# Supplementary material for: Clean synthesis of primary to tertiary carboxamides by CsOH-catalyzed aminolysis of nitriles in water
Source: Royal Society of Chemistry journal article supplement (doi:10.1039/c6gc01565d), 2016-01-01

## Electronic Supplementary Information

# Clean Synthesis of Primary to Tertiary Carboxamides by CsOH-Catalyzed Aminolysis of Nitriles in Water

Yang Li,<sup>+a</sup> Haonan Chen,<sup>+a</sup> Jianping Liu,<sup>\*,a</sup> Xujun Wan,<sup>a</sup> and Qing Xu<sup>\*,a,b</sup>

<sup>a</sup> College of Chemistry and Materials Engineering, Wenzhou University, Wenzhou, Zhejiang 325035,  
P. R. China

<sup>b</sup> School of Chemistry and Chemical Engineering, Yangzhou University, Yangzhou, Jiangsu 225002, P.  
R. China

<sup>+</sup>These two authors contributed equally to this work.

E-mail: [518liujianping@163.com](mailto:518liujianping@163.com); [qing-xu@wzu.edu.cn](mailto:qing-xu@wzu.edu.cn)

## Contents

|                                                                               |     |
|-------------------------------------------------------------------------------|-----|
| Detailed Condition Screening Table.....                                       | S2  |
| Control Reactions.....                                                        | S3  |
| Experimental, Synthetic Procedures, and Characterization of the Products..... | S10 |
| Copies of <sup>1</sup> H and <sup>13</sup> C NMR Spectra of All Products..... | S26 |

**Table S1.** Condition Screening and Optimization for Primary Carboxamide Synthesis by Nitrile Aminolysis with Ammonia.<sup>a</sup>

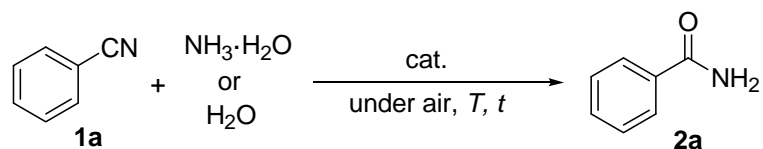

| run | cat. (mol%)                          | reactant                          | <i>T, t</i>  | <b>2a</b> % <sup>b</sup> |
|-----|--------------------------------------|-----------------------------------|--------------|--------------------------|
| 1   | CsOH·H <sub>2</sub> O (10)           | H <sub>2</sub> O                  | 100 °C, 24 h | 61 <sup>c</sup>          |
| 2   | CsOH·H <sub>2</sub> O (10)           | H <sub>2</sub> O                  | 100 °C, 2 h  | 57 <sup>d</sup>          |
| 3   | CsOH·H <sub>2</sub> O (10)           | H <sub>2</sub> O                  | 100 °C, 1 h  | 48 <sup>e</sup>          |
| 4   | CsOH·H <sub>2</sub> O (10)           | NH <sub>3</sub> ·H <sub>2</sub> O | 100 °C, 1 h  | >99 (94)                 |
| 5   | KOH (10)                             | NH <sub>3</sub> ·H <sub>2</sub> O | 100 °C, 2 h  | 64                       |
| 6   | KOH (10)                             | H <sub>2</sub> O                  | 100 °C, 2 h  | 41                       |
| 7   | NaOH (10)                            | NH <sub>3</sub> ·H <sub>2</sub> O | 100 °C, 2 h  | 80                       |
| 8   | NaOH (10)                            | H <sub>2</sub> O                  | 100 °C, 2 h  | 11                       |
| 9   | <i>t</i> -BuOK (10)                  | NH <sub>3</sub> ·H <sub>2</sub> O | 100 °C, 2 h  | 60                       |
| 10  | <i>t</i> -BuOK (10)                  | H <sub>2</sub> O                  | 100 °C, 2 h  | 38                       |
| 11  | <i>t</i> -BuONa (10)                 | NH <sub>3</sub> ·H <sub>2</sub> O | 100 °C, 2 h  | 81                       |
| 12  | <i>t</i> -BuONa (10)                 | H <sub>2</sub> O                  | 100 °C, 2 h  | 46                       |
| 13  | Cs <sub>2</sub> CO <sub>3</sub> (10) | NH <sub>3</sub> ·H <sub>2</sub> O | 100 °C, 5 h  | 0                        |
| 14  | CsF (10)                             | NH <sub>3</sub> ·H <sub>2</sub> O | 100 °C, 5 h  | 0                        |
| 15  | --                                   | NH <sub>3</sub> ·H <sub>2</sub> O | 100 °C, 24 h | 0                        |
| 16  | CsOH·H <sub>2</sub> O (10)           | NH <sub>3</sub> ·H <sub>2</sub> O | 80 °C, 6 h   | 96                       |
| 17  | CsOH·H <sub>2</sub> O (5)            | NH <sub>3</sub> ·H <sub>2</sub> O | 100 °C, 24 h | 80                       |

<sup>a</sup> The mixture of **1a** (1.0 mmol) and base catalyst in NH<sub>3</sub>·H<sub>2</sub>O or distilled water (0.5 mL) was directly sealed under air in a Schlenk tube and then heated and monitored by GC-MS/TLC. <sup>b</sup> GC yields (isolated yield in parenthesis) based on **1a**. <sup>c</sup> 28% PhCN and 11% PhCOOH were detected. <sup>d</sup> 33% PhCN and 10% PhCOOH were detected. <sup>e</sup> 44% PhCN and 8% PhCOOH were detected.

## Control Reactions

### 1. Reaction progress monitoring of the hydration reaction (runs 1-3 in Table 1 in the manuscript and also in Table S1 of ESI)

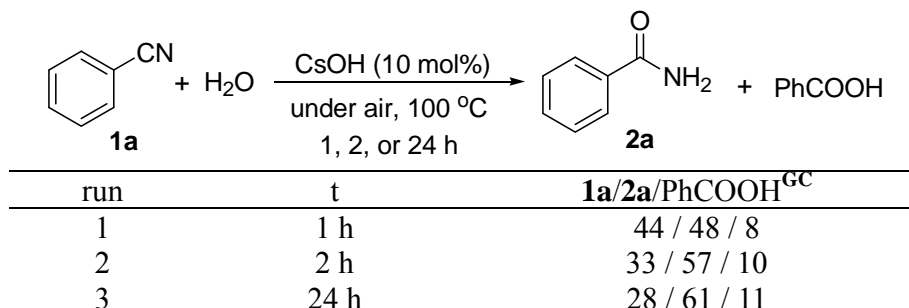

**Typical procedure:** The mixture of **1a** (0.103 g, 1.0 mmol), CsOH:H<sub>2</sub>O (0.018 g, 0.1 mmol, 10 mol%), H<sub>2</sub>O (0.5 mL) in a 20 mL Schlenk tube under air and heated at 100 °C for 1 h. The mixture was then quenched with ethyl acetate and carefully acidified with 0.5 mL HCl (1 M). The organic layer was separated and water layer extracted by ethyl acetate. The combined organic layer was then concentrated, and the crude reaction residues were then subjected to GC-MS analysis (data shown in above table, see also Table 1 in the manuscript and Table S1 in ESI, runs 1-3).

To isolate the generated PhCOOH, the crude reaction residue was again dissolved in ethyl acetate and washed with dilute NaOH for several times to convert PhCOOH to PhCOONa. The separated water layer was also extracted with small amounts of ethyl acetate to remove any organic chemicals. The water layer was then neutralized by HCl to convert PhCOONa back into PhCOOH. However, although we tried several times, the generated low yields of PhCOOH could not be successfully isolated. This is very possibly because the reactions are too small in scale and that the tedious workup procedure involved the use of water. Therefore, GC data were adopted for discussion.

### GC spectra of 1 h reaction:

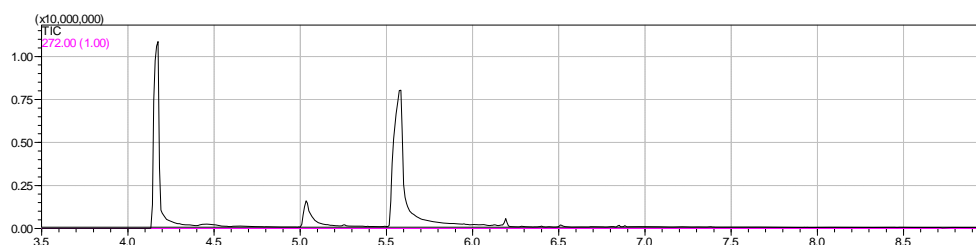

| Ret.time | Start TM | End TM | m/z | Area     | Area% | Height   | Height% A/H |         |
|----------|----------|--------|-----|----------|-------|----------|-------------|---------|
| 4.171    | 4.125    | 4.833  | TIC | 30148241 | 43.55 | 10859644 | 53.45       | 2.78 MI |
| 5.035    | 4.983    | 5.258  | TIC | 5712492  | 8.25  | 1534540  | 7.55        | 3.72 MI |
| 5.579    | 5.500    | 5.767  | TIC | 33373852 | 48.20 | 7925131  | 39.00       | 4.21 MI |

### Mass spectra:

Ret.time: 4.171 min, PhCN (**1a**)

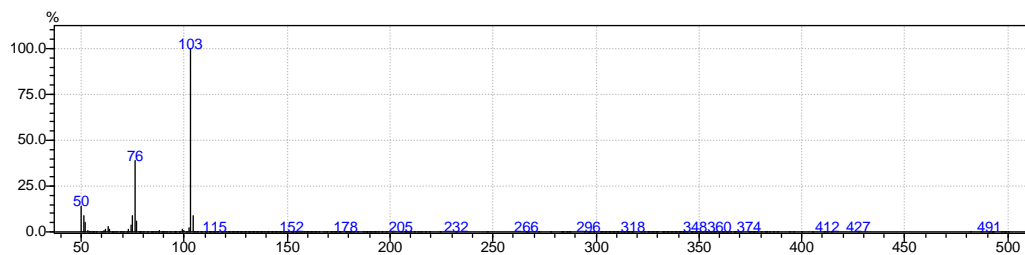

Ret.time: 5.035 min, PhCOOH

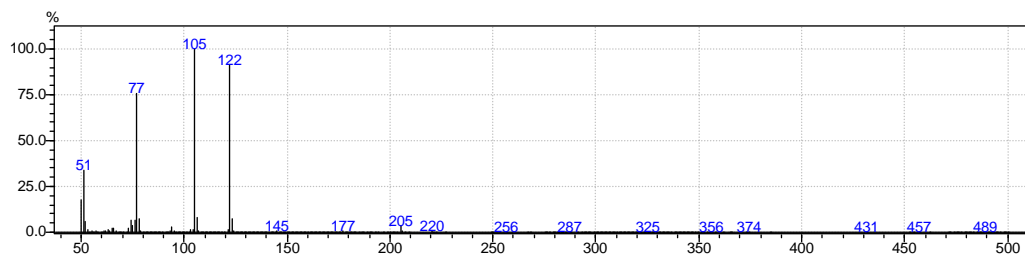

Ret.time: 5.579 min, PhCONH<sub>2</sub> (**2a**)

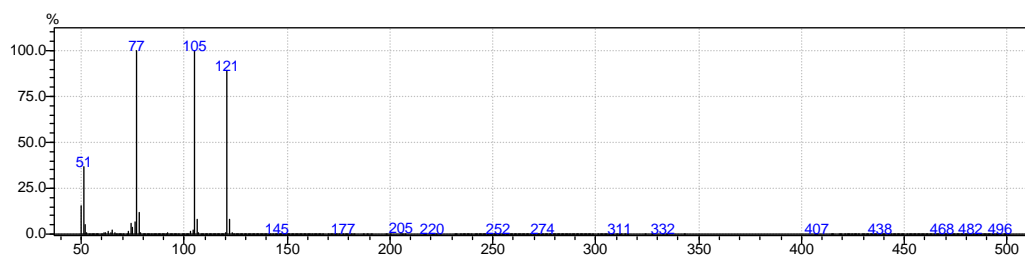

### GC spectra of 2 h reaction:

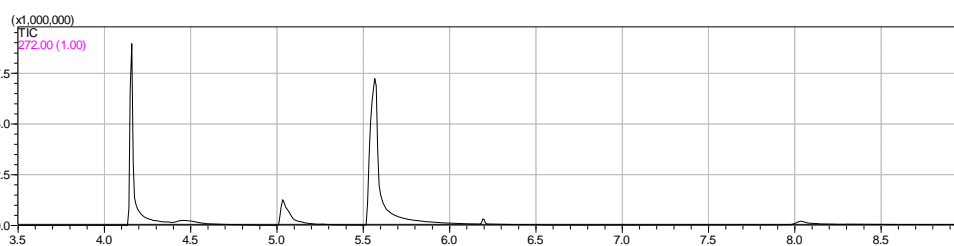

| Ret.time | Start TM | End TM | m/z | Area     | Area% | Height  | Height% | A/H     |
|----------|----------|--------|-----|----------|-------|---------|---------|---------|
| 4.156    | 4.117    | 4.642  | TIC | 17314856 | 33.31 | 8955039 | 51.33   | 1.93 MI |
| 5.035    | 4.992    | 5.325  | TIC | 5146724  | 9.90  | 1263932 | 7.25    | 4.07 MI |
| 5.567    | 5.508    | 5.967  | TIC | 29515149 | 56.79 | 7225084 | 41.42   | 4.09 MI |

### Mass spectra:

Ret.time: 4.156 min, PhCN (**1a**)

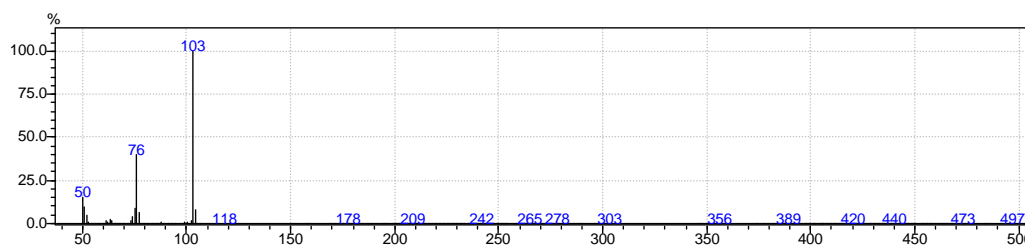

Ret.time: 5.035 min, PhCOOH

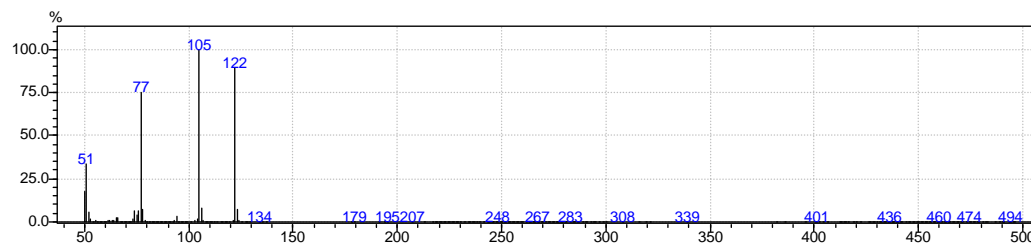

Ret.time: 5.567 min, PhCONH<sub>2</sub> (2a)

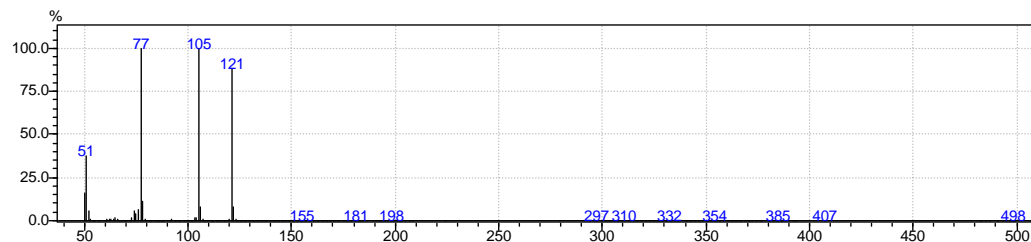

**GC spectra of 24 h reaction:**

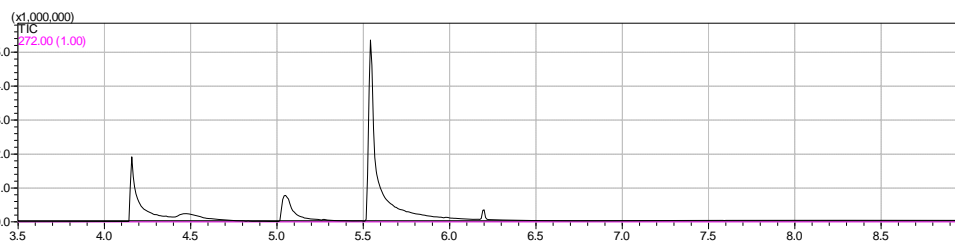

| Ret.time | Start TM | End TM | m/z | Area     | Area% | Height  | Height% | A/H     |
|----------|----------|--------|-----|----------|-------|---------|---------|---------|
| 4.159    | 4.117    | 4.700  | TIC | 8996261  | 28.28 | 1905119 | 23.80   | 4.72 MI |
| 5.047    | 4.992    | 5.200  | TIC | 3474531  | 10.92 | 765860  | 9.57    | 4.54 MI |
| 5.543    | 5.492    | 6.067  | TIC | 19340824 | 60.80 | 5333476 | 66.63   | 3.63 MI |

**Mass spectra:**

Ret.time: 4.159 min, PhCN (1a)

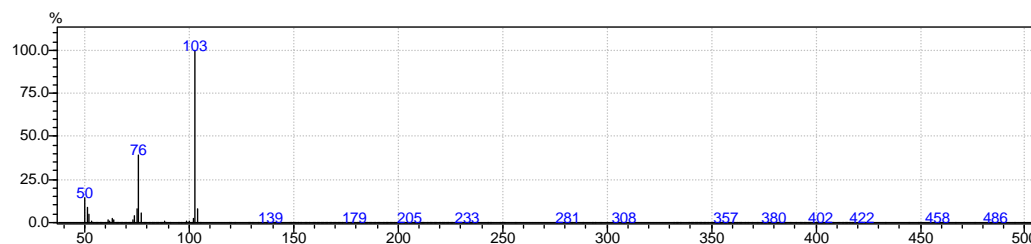

Ret.time: 5.047 min, PhCOOH

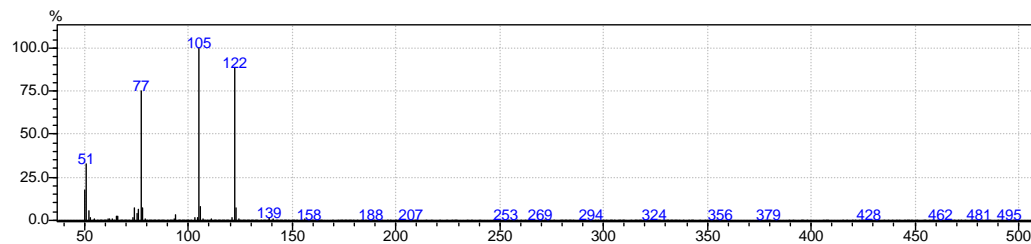

Ret.time: 5.543 min, PhCONH<sub>2</sub> (**2a**)

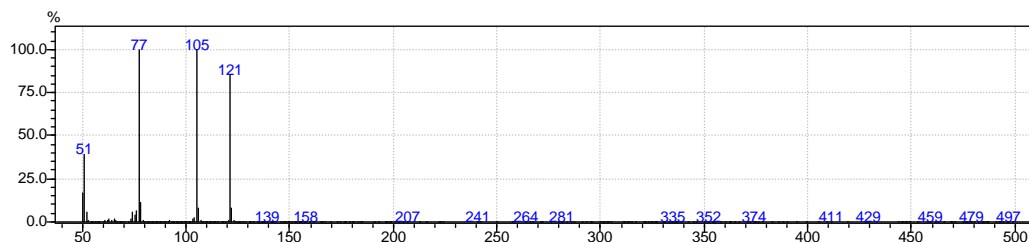

## 2. Condensation of PhCOOH and ammonia (eq. 1 in the manuscript)

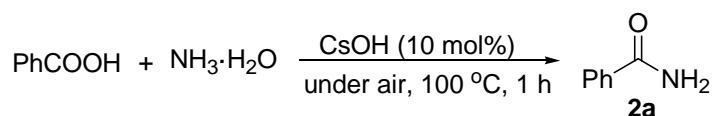

not detected by both TLC and GC

**Procedure:** The mixture of benzoic acid (0.122 g, 1.0 mmol), NH<sub>3</sub>·H<sub>2</sub>O (0.5 mL), CsOH·H<sub>2</sub>O (0.017 g, 0.1 mmol, 10 mol%) in a 20 mL Schlenk tube was sealed under air and heated at 100 °C for 1 h. The reaction mixture was then quenched with ethyl acetate and monitored by TLC and GC-MS analysis. No **2a** could be detected by TLC analysis by comparison with the authentic sample. No formation of **2a** was also detected by GC-MS analysis.

## 3. Reaction progress monitoring of the aminolysis reaction with amines (eq. 2 in the manuscript)

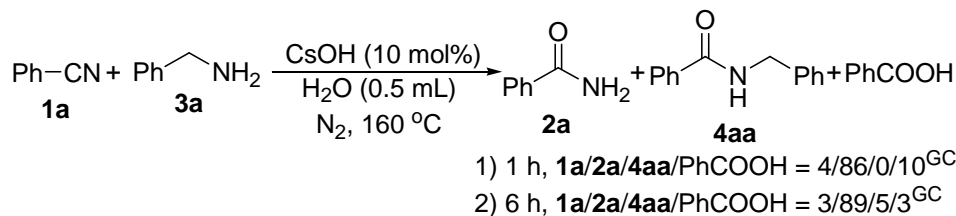

**Procedure:** The mixture of **1a** (0.103 g, 1.0 mmol), **3a** (0.129 g, 1.2 mmol, 1.2 equiv.), CsOH·H<sub>2</sub>O (0.017 g, 0.1 mmol, 10 mol%), H<sub>2</sub>O (0.5 mL) in a 20 mL Schlenk tube was sealed under N<sub>2</sub> and heated at 160 °C for 1 h or 6 h. The reaction mixture was then quenched with ethyl acetate and carefully acidified with 0.5 mL HCl (1M). The organic layer was separated and water layer extracted by ethyl acetate. The combined organic layer was then concentrated and the residue subjected to GC-MS analysis.

### GC spectra of 1 h reaction:

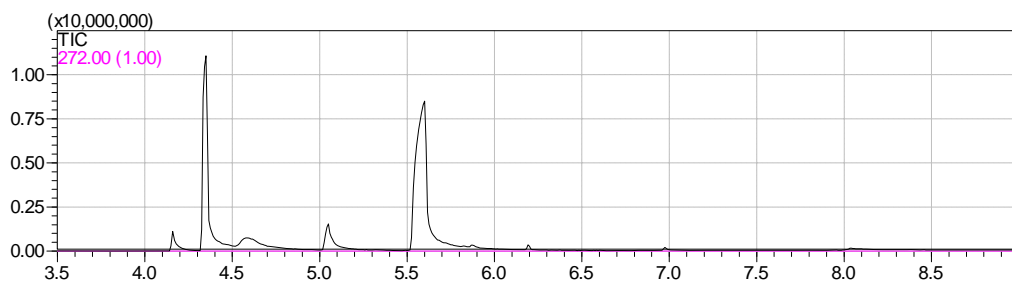

| Ret.time | Start TM | End TM | m/z | Area     | Area% | Height  | Height% | A/H     |
|----------|----------|--------|-----|----------|-------|---------|---------|---------|
| 4.160    | 4.117    | 4.275  | TIC | 2089272  | 4.27  | 1106069 | 9.99    | 1.89 MI |
| 5.048    | 4.975    | 5.300  | TIC | 4760488  | 9.73  | 1493550 | 13.49   | 3.19 MI |
| 5.596    | 5.500    | 6.075  | TIC | 42065059 | 86.00 | 8469612 | 76.52   | 4.97 MI |

### Mass spectra:

Ret.time: 4.160 min, PhCN (**1a**)

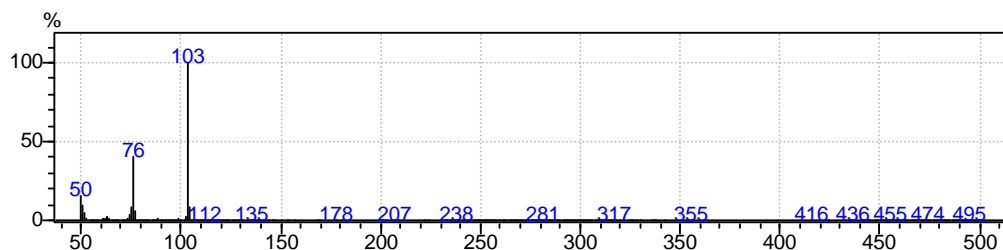

Ret.time: 5.048 min, PhCOOH

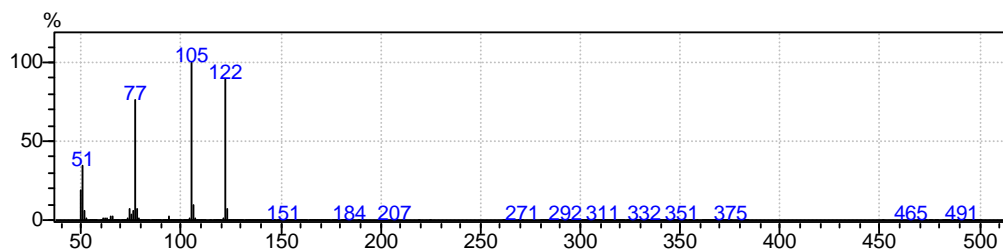

Ret.time: 5.596 min, PhCONH<sub>2</sub> (**2a**)

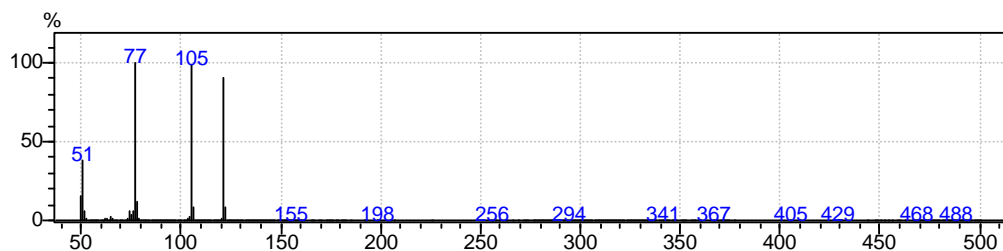

### GC spectra of 6 h reaction:

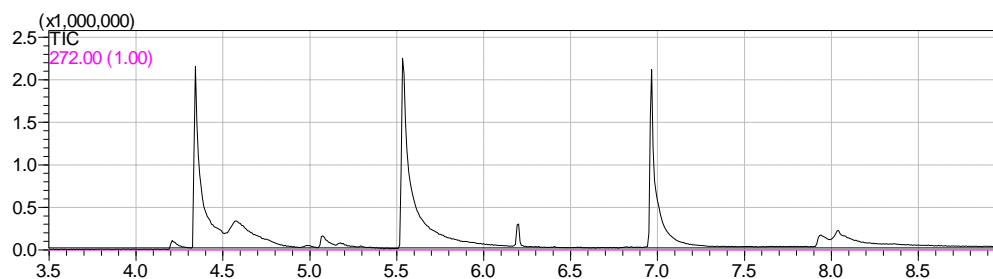

| Ret.time | Start TM | End TM | m/z | Area     | Area% | Height  | Height% | A/H     |
|----------|----------|--------|-----|----------|-------|---------|---------|---------|
| 4.210    | 4.100    | 4.300  | TIC | 319908   | 2.83  | 103301  | 4.00    | 3.09 MI |
| 5.073    | 5.017    | 5.367  | TIC | 602252   | 5.33  | 131869  | 5.10    | 4.57 MI |
| 5.537    | 5.500    | 6.125  | TIC | 10038474 | 88.81 | 2235666 | 86.51   | 4.49 MI |
| 7.940    | 7.917    | 7.975  | TIC | 342722   | 3.03  | 113497  | 4.39    | 3.05 MI |

### Mass spectra:

Ret.time: 4.210 min, PhCN (**1a**)

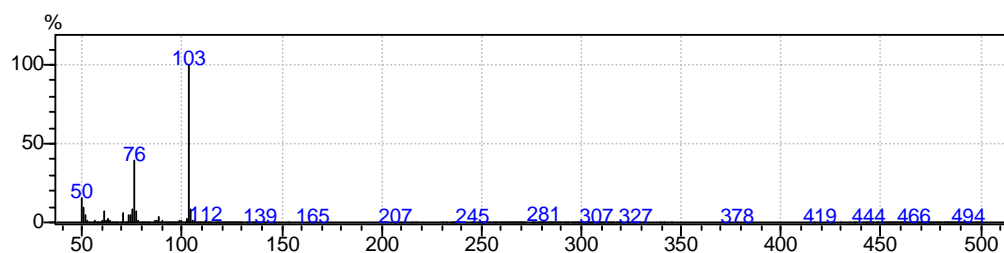

Ret.time: 5.073 min, PhCOOH

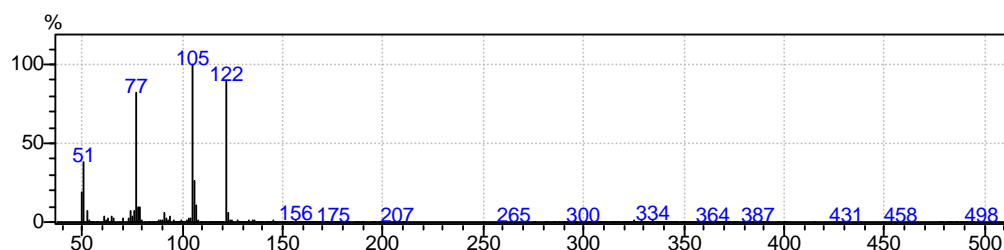

Ret.time: 5.537 min, PhCONH<sub>2</sub> (**2a**)

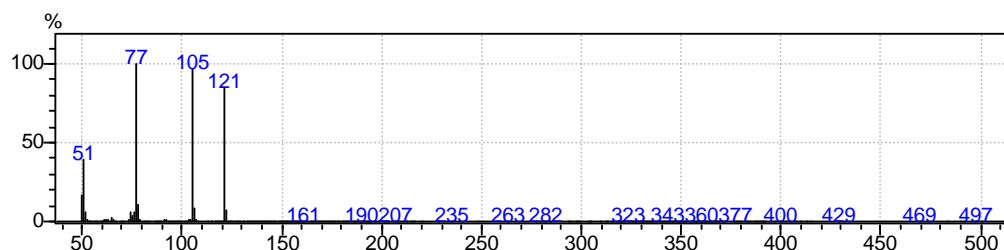

Ret.time: 7.940 min, PhCONHCH<sub>2</sub>Ph (**4aa**)



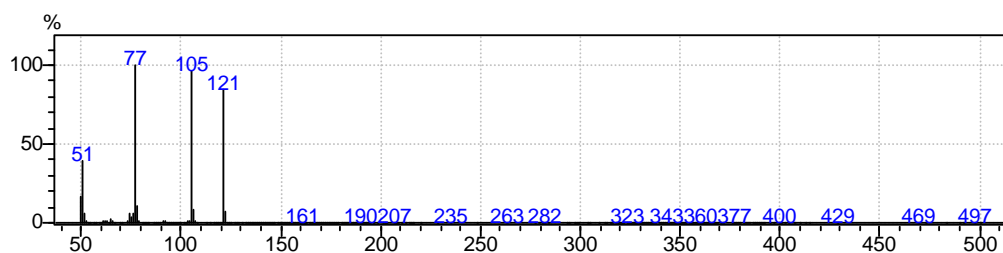

#### 4. Transamidation reaction (eq. 3 in the manuscript)

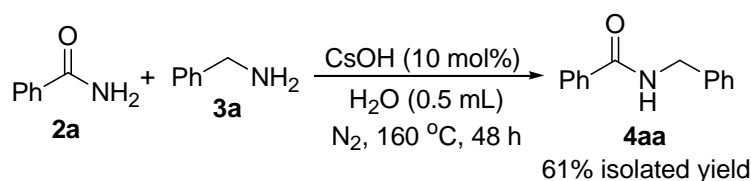

**Procedure:** The mixture of **2a** (0.242 g, 2.0 mmol), **3a** (0.259 g, 2.4 mmol, 1.2 equiv.), CsOH·H<sub>2</sub>O (0.040 g, 0.2 mmol, 10 mol%), H<sub>2</sub>O (0.5 mL) in a 20 mL Schlenk tube was sealed under N<sub>2</sub> and heated at 160 °C for 48 h. The mixture was then quenched with ethyl acetate, solvent evaporated under vacuum, and the residue purified by column chromatography using ethyl acetate and petroleum ether (60-90 °C) (v/v 1/5) as the eluent. 61% Isolated yield (0.254 g) of **4aa** was obtained.

#### 5. Condensation of PhCOOH and benzyl amine (eq. 4 in the manuscript)

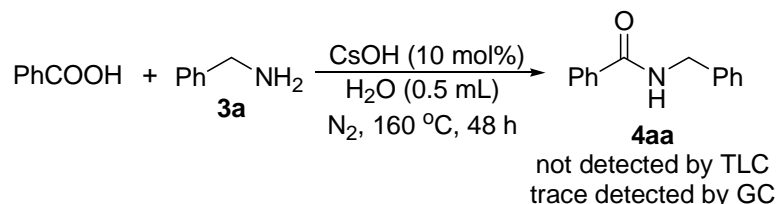

**Procedure:** The mixture of benzoic acid (0.122 g, 1.0 mmol), **3a** (0.129 g, 1.2 mmol, 1.2 equiv.), CsOH·H<sub>2</sub>O (0.017 g, 0.1 mmol, 10 mol%), H<sub>2</sub>O (0.5 mL) in a 20 mL Schlenk tube was sealed under N<sub>2</sub> and heated at 160 °C for 48 h. The mixture was then quenched with ethyl acetate and monitored by TLC and GC-MS analysis. No **4aa** could be detected by TLC by comparison with the authentic sample. Only trace amounts of **4aa** was detected by GC-MS analysis.

## Experimental

**General.** Substrates and catalysts were all purchased and used as received. Progresses of the reactions were monitored by TLC and/or GC-MS. Products were purified by column chromatography on silica gel using petroleum ether and ethyl acetate as the eluent.  $^1\text{H}$  and  $^{13}\text{C}$  NMR spectra were recorded on a Bruker Avance-III 500 instrument (500 MHz for  $^1\text{H}$  and 125.4 MHz for  $^{13}\text{C}$  NMR spectroscopy). Unless otherwise noted,  $d_6$ -DMSO or  $\text{CDCl}_3$  was used as the solvent. Chemical shifts for  $^1\text{H}$  and  $^{13}\text{C}$  NMR were referred to internal  $\text{Me}_4\text{Si}$  (0 ppm). Mass spectra were measured on a Shimadzu GCMS-QP2010 Plus spectrometer (EI).

**Typical Procedure for CsOH-Catalyzed Nitrile Aminolysis with Ammonia for Preparation of Primary Amides.** The mixture of benzonitrile **1a** (0.103g, 1.0 mmol) and  $\text{CsOH}\cdot\text{H}_2\text{O}$  (0.017 g, 0.1 mmol, 10 mol%) in  $\text{NH}_3\cdot\text{H}_2\text{O}$  (0.5 mL) was directly sealed under air in a Schlenk tube and then heated at  $100\text{ }^\circ\text{C}$  for 1 h. After completion of the reaction as monitored by GC-MS and/or TLC, the mixture was directly purified, without any workup, through a silica gel column by using ethyl acetate and petroleum ether as the eluent, affording benzamide **2a** in 94% isolated yield.

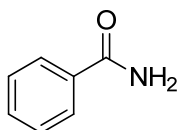

**Benzamide (2a).**  $^1\text{H}$  NMR (500 MHz,  $d_6$ -DMSO):  $\delta$  7.97 (b, 1H), 7.89-7.86 (m, 2H), 7.54-7.51 (m, 1H), 7.47-7.44 (m, 2H), 7.36 (b, 1H).  $^{13}\text{C}$  NMR (125.4 MHz,  $d_6$ -DMSO):  $\delta$  167.9, 134.2, 131.2, 128.2, 127.4. MS (EI):  $m/z$  (%) 122 (6), 121 (86), 106 (8), 105 (100), 78 (12), 77 (83), 76 (6), 75 (4), 74 (6), 65 (2), 52 (6), 51 (35), 50 (20), 44 (8), 39 (6), 38 (4), 37 (3), 27 (4). This compound was known: Li, Z.; Wang, L.; Zhou, X. *Adv. Synth. Catal.* **2012**, 354, 584-588.

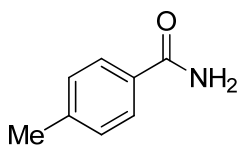

**4-Methylbenzamide (2b).**  $^1\text{H}$  NMR (500 MHz,  $d_6$ -DMSO):  $\delta$  7.71 (d,  $J = 8.0$  Hz, 2H), 7.25 (d,  $J = 8.0$  Hz, 2H), 6.01 (b, 2H), 2.40 (s, 3H).  $^{13}\text{C}$  NMR (125.4 MHz,  $d_6$ -DMSO):  $\delta$  169.4, 142.5, 130.6, 129.3, 127.4, 21.5. MS (EI):  $m/z$  (%) 136 (5), 135 (60), 120 (8), 119 (100), 117 (3), 92 (5), 91 (74), 90 (8), 89 (10), 65 (33), 64 (4), 63 (13), 51 (9), 50 (6), 44 (12), 41 (5), 40 (9), 39 (20), 38 (4). This compound was known: Li, Z.; Wang, L.; Zhou, X. *Adv. Synth. Catal.* **2012**, 354, 584-588.

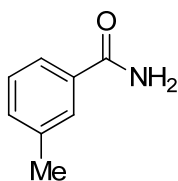

**3-Methylbenzamide (2c).**  $^1\text{H}$  NMR (500 MHz,  $d_6$ -DMSO):  $\delta$  7.92 (b, 1H), 7.71 (s, 1H), 7.68-7.66 (m, 1H), 7.33 (d,  $J = 5.0$  Hz, 2H), 7.30 (b, 1H), 2.35 (s, 3H).  $^{13}\text{C}$  NMR (125.4 MHz,  $d_6$ -DMSO):  $\delta$  168.0, 137.4, 134.2, 131.7, 128.0, 124.5, 20.9. MS (EI):  $m/z$  (%) 136 (6), 135 (63), 120 (9), 119 (100), 117 (4), 116 (2), 92 (6), 91 (77), 90 (5), 89 (7), 65 (18), 63 (6), 62 (2), 51(4), 44 (3), 39 (6). This compound was known: Li, Z.; Wang, L.; Zhou, X. *Adv. Synth. Catal.* **2012**, 354, 584-588.

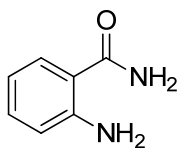

**2-Aminobenzamide (2d).**  $^1\text{H}$  NMR (500 MHz,  $d_6$ -DMSO):  $\delta$  7.70 (b, 1H), 7.51 (d,  $J = 8.0$  Hz, 1H), 7.13-7.10 (m, 1H), 7.03 (b, 1H), 6.66 (d,  $J = 8.0$  Hz, 1H), 6.53 (b, 2H), 6.48-6.45 (m, 1H).  $^{13}\text{C}$  NMR (125.4 MHz,  $d_6$ -DMSO):  $\delta$  171.3, 150.1, 131.8, 128.7, 116.4, 114.4, 113.7. MS (EI):  $m/z$  (%) 137(6), 136 (74), 120 (15), 119 (100), 118 (6), 93 (4), 92 (52), 91 (15), 66 (4), 65 (24), 64 (9), 63 (6), 52 (5), 39 (9). This compound was known: Tao, T.; Wang, Z.; Liu, Z.; Feng, X.; Wang, Q. *Green. Chem.* **2012**, 14, 921-924.

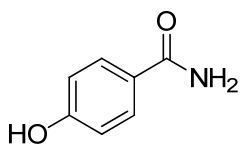

**4-Hydroxybenzamide (2e).**  $^1\text{H}$  NMR (500 MHz,  $d_6$ -DMSO):  $\delta$  9.94 (b, 1H), 7.73 (d,  $J = 8.5$  Hz, 2H), 7.71 (b, 1H), 7.05 (b, 1H), 6.78 (d,  $J = 9.0$  Hz, 2H).  $^{13}\text{C}$  NMR (125.4 MHz,  $d_6$ -DMSO):  $\delta$  167.6, 160.1, 129.4, 125.0, 114.6. MS (EI):  $m/z$  (%) 138 (5), 137 (59), 122 (8), 121 (100), 93 (36), 92 (6), 66 (4), 65 (33), 64 (6), 63 (12), 62 (6), 55 (4), 53 (7), 50 (4), 44 (7), 39 (22), 38 (7), 37 (3). This compound was known: Datta, B.; Pasha, M. A. *Bull. Korean Chem. Soc.* **2012**, 33(7), 2129-2130.

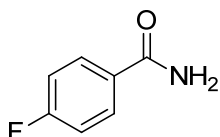

**4-Fluorobenzamide (2f).**  $^1\text{H}$  NMR (500 MHz,  $d_6$ -DMSO):  $\delta$  7.98 (b, 1H), 7.96-7.93 (m, 2H), 7.38 (b, 1H), 7.28-7.25 (m, 2H).  $^{13}\text{C}$  NMR (125.4 MHz,  $d_6$ -DMSO):  $\delta$  166.8, 163.9 (d,  $J_{\text{C-F}} = 247.7$  Hz), 130.7, 130.0, 115.0 (d,  $J_{\text{C-F}} = 21.7$  Hz). MS (EI):  $m/z$  (%) 140 (6), 139 (62), 124 (8), 123 (100), 122 (2), 121 (5), 96 (10), 95 (80), 94 (8), 93 (3), 83 (3), 76 (4), 75 (35), 74 (10), 70 (4), 69 (8), 68 (6), 63

(4), 62 (3), 61 (3), 57 (4), 51 (7), 50 (14), 44 (11), 39 (3), 38 (3), 37 (4), 31 (3). This compound was known: Tao, T.; Wang, Z.; Liu, Z.; Feng, X.; Wang, Q. *Green. Chem.* **2012**, *14*, 921-924.

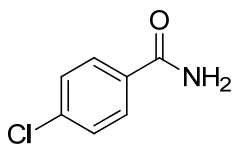

**4-Chlorobenzamide (2g).**  $^1\text{H}$  NMR (500 MHz,  $d_6$ -DMSO):  $\delta$  8.04 (b, 1H), 7.89 (d,  $J = 8.5$  Hz, 2H), 7.53 (d,  $J = 8.5$  Hz, 2H), 7.45 (b, 1H).  $^{13}\text{C}$  NMR (125.4 MHz,  $d_6$ -DMSO):  $\delta$  166.8, 136.0, 133.0, 129.4, 128.2. MS (EI):  $m/z$  (%) 157 (16), 155 (50), 141 (29), 140 (8), 139 (100), 137 (8), 113 (16), 112 (5), 111 (51), 85 (4), 77 (5), 76 (8), 75 (35), 74 (15), 73 (5), 51 (10), 50 (21), 44 (10), 38 (5), 28 (4). This compound was known: Li, Z.; Wang, L.; Zhou, X. *Adv. Synth. Catal.* **2012**, *354*, 584-588.

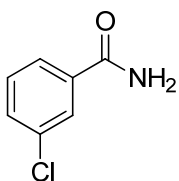

**3-Chlorobenzamide (2h).**  $^1\text{H}$  NMR (500 MHz,  $d_6$ -DMSO):  $\delta$  8.09 (b, 1H), 7.92-7.91 (m, 1H), 7.85-7.83 (m, 1H), 7.61-7.59 (m, 1H), 7.52 (b, 1H), 7.51-7.48 (m, 2H).  $^{13}\text{C}$  NMR (125.4 MHz,  $d_6$ -DMSO):  $\delta$  166.4, 136.3, 133.1, 131.0, 130.2, 127.3, 126.1. MS (EI):  $m/z$  (%) 157 (16), 156 (4), 155 (50), 141 (29), 140 (8), 139 (100), 137 (8), 113 (16), 112 (5), 111 (51), 85 (4), 77 (5), 76 (8), 75 (35), 74 (15), 73 (5), 51 (10), 50 (21), 44 (10), 28 (4). This compound was known: Tao, T.; Wang, Z.; Liu, Z.; Feng, X.; Wang, Q. *Green. Chem.* **2012**, *14*, 921-924.

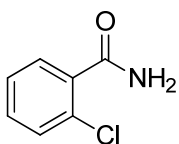

**2-Chlorobenzamide (2i).**  $^1\text{H}$  NMR (500 MHz,  $d_6$ -DMSO):  $\delta$  7.88 (b, 1H), 7.58 (b, 1H), 7.49-7.47 (m, 1H), 7.46-7.42 (m, 2H), 7.40-7.38 (m, 1H).  $^{13}\text{C}$  NMR (125.4 MHz,  $d_6$ -DMSO):  $\delta$  168.2, 137.1, 130.5, 129.60, 129.57, 128.6, 127.0. MS (EI):  $m/z$  (%) 157 (18), 156 (4), 155 (58), 142 (2), 141 (32), 140 (8), 139 (100), 113 (12), 112 (6), 111 (38), 85 (3), 77 (9), 76 (8), 75 (26), 74 (8), 51 (9), 50 (16), 44 (11), 38 (4), 37 (3). This compound was known: Li, Z.; Wang, L.; Zhou, X. *Adv. Synth. Catal.* **2012**, *354*, 584-588.

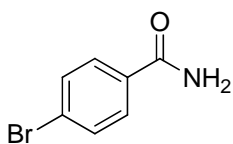

**4-Bromobenzamide (2j).**  $^1\text{H}$  NMR (500 MHz,  $d_6$ -DMSO):  $\delta$  8.05 (b, 1H), 7.83-7.81 (m, 2H),

7.67-7.65 (m, 2H), 7.46 (b, 1H).  $^{13}\text{C}$  NMR (125.4 MHz,  $d_6$ -DMSO):  $\delta$  167.0, 133.4, 131.2, 129.6, 125.0. MS (EI):  $m/z$  (%) 201 (51), 199 (53), 185 (94), 184 (7), 183 (100), 157 (37), 155 (38), 77 (20), 76 (46), 75 (45), 74 (26), 73 (6), 65 (6), 51 (22), 50 (67), 49 (6), 44 (25). This compound was known: Tao, T.; Wang, Z.; Liu, Z.; Feng, X.; Wang, Q. *Green. Chem.* **2012**, *14*, 921-924.

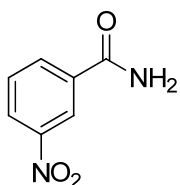

**3-Nitrobenzamide (2k).**  $^1\text{H}$  NMR (500 MHz,  $d_6$ -DMSO):  $\delta$  8.69 (s, 1H), 8.39 (b, 1H), 8.36 (d,  $J$  = 8.0 Hz, 1H), 8.31 (d,  $J$  = 7.5 Hz, 1H), 7.79-7.76 (m, 1H), 7.73 (b, 1H).  $^{13}\text{C}$  NMR (125.4 MHz,  $d_6$ -DMSO):  $\delta$  165.8, 147.8, 135.7, 133.8, 130.1, 125.9, 122.2. MS (EI):  $m/z$  (%) 167 (6), 166 (67), 151 (8), 150 (100), 105 (3), 104 (33), 103 (8), 92 (17), 77 (14), 76 (54), 75 (32), 74 (32), 73 (6), 65 (26), 64 (6), 63 (9), 62 (5), 53 (4), 52 (5), 51 (26), 50 (52), 46 (20), 44 (50), 39 (9), 38 (8), 37 (5), 30 (31). This compound was known: Li, Z.; Wang, L.; Zhou, X. *Adv. Synth. Catal.* **2012**, *354*, 584-588.

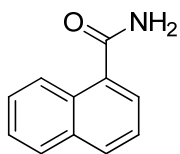

**1-Naphthamide (2l).**  $^1\text{H}$  NMR (500 MHz,  $d_6$ -DMSO):  $\delta$  8.31 (d,  $J$  = 8.5 Hz, 1H), 8.01-7.96 (m, 3H), 7.64 (d,  $J$  = 6.5 Hz, 1H), 7.59-7.52 (m, 4H).  $^{13}\text{C}$  NMR (125.4 MHz,  $d_6$ -DMSO):  $\delta$  171.4, 135.4, 134.0, 130.53, 130.50, 128.9, 127.4, 126.9, 126.4, 125.9, 125.7. MS (EI):  $m/z$  (%) 172 (9), 171 (72), 170 (26), 156 (9), 155 (75), 154 (7), 153 (4), 128 (15), 127 (100), 126 (28), 125.4 (3), 115 (9), 101 (9), 85 (4), 77 (12), 76 (5), 75 (10), 63 (12), 51 (8), 50 (6), 44 (4). This compound was known: Tao, T.; Wang, Z.; Liu, Z.; Feng, X.; Wang, Q. *Green. Chem.* **2012**, *14*, 921-924.

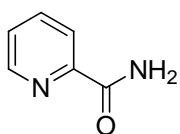

**Picolinamide (2m).**  $^1\text{H}$  NMR (500 MHz,  $d_6$ -DMSO):  $\delta$  8.58 (d,  $J$  = 4.5 Hz, 1H), 8.22 (d,  $J$  = 8.0 Hz, 1H), 7.88-7.85 (m, 2H), 7.47-7.44 (m, 1H), 5.97 (b, 1H).  $^{13}\text{C}$  NMR (125.4 MHz,  $d_6$ -DMSO):  $\delta$  166.5, 150.8, 149.0, 138.2, 127.0, 122.4. MS (EI):  $m/z$  (%) 123 (2), 122 (29), 80 (6), 79 (100), 78 (34), 76 (5), 53 (7), 52 (50), 51 (39), 50 (20), 49 (5), 44 (19), 39 (8), 38 (6), 37 (4), 28 (7), 27 (8), 26 (7), 16 (5). This compound was known: Tamura, M.; Wakasugi, H.; Shimizu, K.; Satsuma, A. *Chem. Eur. J.* **2011**, *17*, 11428-11431.

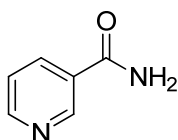

**Nicotinamide (2n).**  $^1\text{H}$  NMR (500 MHz,  $d_6$ -DMSO):  $\delta$  9.02 (s, 1H), 8.69 (dd,  $J = 1.5$ ,  $J = 5.0$  Hz, 1H), 8.20 (d,  $J = 7.5$  Hz, 1H), 8.14 (b, 1H), 7.58 (b, 1H), 7.48 (dd,  $J = 8.0$ ,  $J = 5.0$  Hz, 1H).  $^{13}\text{C}$  NMR (125.4 MHz,  $d_6$ -DMSO):  $\delta$  166.4, 151.8, 148.6, 135.1, 129.7, 123.4. MS (EI):  $m/z$  (%) 123 (8), 122 (100), 106 (60), 105 (6), 104 (3), 94 (3), 79 (8), 78 (69), 77 (7), 76 (3), 75 (2), 53 (3), 52 (12), 51 (30), 50 (13), 49 (2), 44 (8), 39 (3), 38 (2). This compound was known: Li, Z.; Wang, L.; Zhou, X. *Adv. Synth. Catal.* **2012**, 354, 584-588.

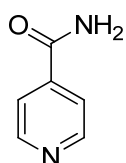

**Isonicotinamide (2o).**  $^1\text{H}$  NMR (500 MHz,  $d_6$ -DMSO):  $\delta$  8.72 (d,  $J = 6.0$  Hz, 2H), 8.24 (b, 1H), 7.77 (d,  $J = 5.5$  Hz, 2H), 7.71 (b, 1H).  $^{13}\text{C}$  NMR (125.4 MHz,  $d_6$ -DMSO):  $\delta$  166.3, 150.2, 141.3, 121.4. MS (EI):  $m/z$  (%) 123 (8), 122 (100), 107 (2), 106 (40), 79 (12), 78 (56), 77 (2), 53 (2), 52 (15), 51 (36), 50 (14), 49 (2), 44 (13), 39 (3), 28 (3), 26 (2). This compound was known: Tao, T.; Wang, Z.; Liu, Z.; Feng, X.; Wang, Q. *Green. Chem.* **2012**, 14, 921-924.

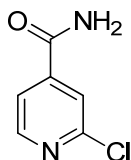

**2-Chloroisonicotinamide (2p).**  $^1\text{H}$  NMR (500 MHz,  $d_6$ -DMSO):  $\delta$  8.56 (d,  $J = 5.0$  Hz, 1H), 8.33 (b, 1H), 7.87 (b, 2H), 7.78 (dd,  $J = 5.0$ ,  $J = 1.5$  Hz, 1H).  $^{13}\text{C}$  NMR (125.4 MHz,  $d_6$ -DMSO):  $\delta$  164.9, 150.9, 150.7, 144.9, 122.1, 121.0. MS (EI):  $m/z$  (%) 158 (25), 157 (7), 156 (78), 142 (32), 141 (8), 140 (100), 114 (16), 112 (48), 85 (14), 78 (8), 76 (19), 75 (4), 51 (10), 50 (16), 44(13), 28 (3). This compound was known: Sahnoun, S.; Messaoudi, S.; Peyrat, J.; Brion, J.; Alami, M. *Tetrahedron Lett.* **2012**, 53, 2860-2863.

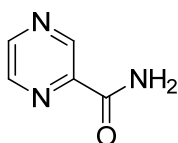

**Pyrazine-2-Carboxamide (2q).**  $^1\text{H}$  NMR (500 MHz,  $d_6$ -DMSO):  $\delta$  9.19 (d,  $J = 1.5$  Hz, 1H), 8.85 (d,  $J = 2.5$  Hz, 1H), 8.71 (dd,  $J = 2.5$ ,  $J = 1.5$  Hz, 1H), 8.25 (b, 1H), 7.86 (b, 1H).  $^{13}\text{C}$  NMR (125.4 MHz,  $d_6$ -DMSO):  $\delta$  170.3, 152.6, 150.3, 148.9, 148.8. MS (EI):  $m/z$  (%) 124 (7), 123 (100), 81 (4), 80 (80), 79 (18), 54 (2), 53 (51), 52 (32), 51 (9), 44 (18), 40 (2), 28 (12), 26 (15). This compound was known:

Tamura, M.; Wakasugi, H.; Shimizu, K.; Satsuma, A. *Chem. Eur. J.* **2011**, *17*, 11428-11431.

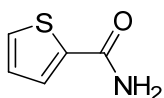

**Thiophene-2-Carboxamide (2r).** <sup>1</sup>H NMR (500 MHz, *d*<sub>6</sub>-DMSO):  $\delta$  7.99 (b, 1H), 7.78-7.77 (m, 2H), 7.40 (b, 1H), 7.18-7.16 (m, 1H). <sup>13</sup>C NMR (125.4 MHz, *d*<sub>6</sub>-DMSO):  $\delta$  168.1, 145.5, 136.2, 133.9, 133.1. MS (EI): *m/z* (%) 129 (4), 128 (5), 127(75), 113 (6), 112 (7), 111 (100), 83 (13), 82 (8), 81 (7), 58 (13), 57 (18), 54 (4), 53 (4), 50 (5), 45 (19), 44 (18), 39 (60), 38 (10). This compound was known: Rocío, G.-Á.; Josefina, D.; Pascale, C.; Victorio, C. *Organometallics.* **2011**, *30*, 5442–5451.

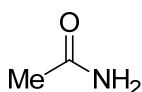

**Acetamide (2s).** <sup>1</sup>H NMR (500 MHz, *d*<sub>6</sub>-DMSO):  $\delta$  7.30 (b, 1H), 6.68 (b, 1H), 1.77 (s, 3H). <sup>13</sup>C NMR (125.4 MHz, *d*<sub>6</sub>-DMSO):  $\delta$  171.6, 22.4. MS (EI): *m/z* (%) 59 (M<sup>+</sup>). This compound was known: Li, Z.; Wang, L.; Zhou, X. *Adv. Synth. Catal.* **2012**, *354*, 584-588.

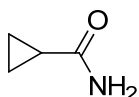

**Cyclopropanecarboxamide (2t).** <sup>1</sup>H NMR (500 MHz, *d*<sub>6</sub>-DMSO):  $\delta$  7.49 (b, 1H), 6.72 (b, 1H), 1.52-1.47 (m, 1H), 0.65-0.59 (m, 4H). <sup>13</sup>C NMR (125.4 MHz, *d*<sub>6</sub>-DMSO):  $\delta$  175.2, 13.8, 6.7. MS (EI): *m/z* (%) 85 (8), 84 (61), 69 (25), 68 (8), 54 (5), 44 (100), 43 (8), 42 (41), 41 (72), 40 (16), 39 (90), 38 (20), 37 (12), 28 (26), 27 (20), 26 (12), 16 (10), 15 (7), 14 (6). This compound was known: Jiang, D.; Yuan, F.; Jiang, B.; Li, C. *Chinese Patent Application*, **2011**, CN102249949A (20111123).

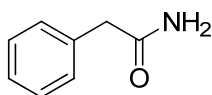

**2-Phenylacetamide (2u).** <sup>1</sup>H NMR (500 MHz, CDCl<sub>3</sub>):  $\delta$  7.38-7.35 (m, 2H), 7.32-7.27 (m, 3H), 5.56 (b, 1H), 5.38 (b, 1H), 3.59 (s, 2H). <sup>13</sup>C NMR (125.4 MHz, CDCl<sub>3</sub>):  $\delta$  173.4, 134.9, 129.4, 129.1, 127.5, 43.4. MS (EI): *m/z* (%) 135 (18), 93 (7), 92 (92), 91 (100), 90 (5), 89 (8), 65 (25), 64 (3), 63 (11), 51 (8), 50 (4), 44 (21), 41 (3), 39 (16), 38 (3). This compound was known: Li, Z.; Wang, L.; Zhou, X. *Adv. Synth. Catal.* **2012**, *354*, 584-588.

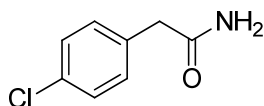

**2-(4-Chlorophenyl)acetamide (2v).** <sup>1</sup>H NMR (500 MHz, *d*<sub>6</sub>-DMSO):  $\delta$  7.48 (b, 1H), 7.36 (d, *J* = 8.5 Hz, 2H), 7.28 (d, *J* = 8.5 Hz, 2H), 6.90 (b, 1H), 3.38 (s, 2H). <sup>13</sup>C NMR (125.4 MHz, *d*<sub>6</sub>-DMSO):  $\delta$  171.8, 135.5, 130.96, 130.91, 128.0, 41.3. MS (EI): *m/z* (%) 158 (14), 156 (41), 128 (15), 127 (24),

126 (46), 125 (63), 112 (4), 99 (6), 92 (8), 91 (100), 90 (7), 89 (16), 77 (5), 65 (5), 63 (9), 51 (6), 39 (7), 31 (17). This compound was known: Khodaei, M. M.; Nazari, E. *Tetrahedron Lett.* **2012**, 53, 2881-2884.

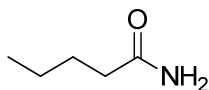

**Pentanamide (2w).**  $^1\text{H}$  NMR (500 MHz,  $d_6$ -DMSO):  $\delta$  7.22 (b, 1H), 6.66 (b, 1H), 2.03 (t,  $J = 7.5$  Hz, 2H), 1.49-1.43 (m, 2H), 1.29-1.24 (m, 2H), 0.89-0.85 (m, 3H).  $^{13}\text{C}$  NMR (125.4 MHz,  $d_6$ -DMSO):  $\delta$  174.3, 34.8, 27.2, 21.8, 13.7. MS (EI):  $m/z$  (%) 86 (3), 85 (2), 73 (3), 72 (18), 60 (3), 59 (100), 57 (11), 55 (5), 44 (39), 43 (9), 42 (4), 41 (16), 39 (6), 29 (19), 28 (4). This compound was known: Das, R.; Chakraborty, D. *Catal. Commun.* **2012**, 26, 48-53.

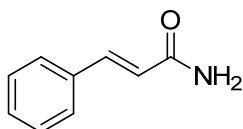

**Cinnamamide (2x).**  $^1\text{H}$  NMR (500 MHz,  $d_6$ -DMSO):  $\delta$  7.57-7.54 (m, 3H), 7.44-7.37 (m, 4H), 7.10 (b, 1H), 6.62 (d,  $J = 16.0$  Hz, 1H).  $^{13}\text{C}$  NMR (125.4 MHz,  $d_6$ -DMSO):  $\delta$  166.6, 139.1, 134.9, 129.4, 128.9, 127.5, 122.3. MS (EI):  $m/z$  (%) 148 (6), 147 (55), 146 (100), 131 (60), 130 (22), 129 (61), 128 (18), 104 (8), 103 (80), 102 (35), 78 (12), 77 (49), 76 (10), 63 (8), 51 (32), 50 (13), 44 (9), 39 (7). This compound was known: Li, Z.; Wang, L.; Zhou, X. *Adv. Synth. Catal.* **2012**, 354, 584-588.

**Typical Procedure for CsOH-Catalyzed Nitrile Aminolysis with Primary and Secondary Amines for Preparation of Secondary and Tertiary Carboxamides.** The mixture of benzonitrile **1a** (0.103g, 1.0 mmol), benzylamine **3a** (0.129g, 1.2 mmol, 1.2 equiv.), and CsOH·H<sub>2</sub>O (0.017 g, 0.1 mmol, 10 mol%) in distilled H<sub>2</sub>O (0.5 mL) was sealed under nitrogen in a Schlenk tube and then heated at 160 °C for 2 days. After completion of the reaction as monitored by GC-MS and/or TLC, the mixture was directly purified, without any workup, through a silica gel column by using ethyl acetate and petroleum ether as the eluent, affording *N*-benzylbenzamide **4aa** in 68% isolated yield.

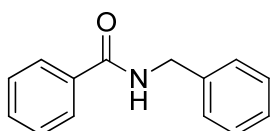

***N*-Benzyl benzamide (4aa).**  $^1\text{H}$  NMR (500 MHz,  $d_6$ -DMSO):  $\delta$  9.05 (t,  $J = 6.0$  Hz, 1H), 7.91 (d,  $J = 7.5$  Hz, 2H), 7.56-7.53 (m, 1H), 7.50-7.47 (m, 2H), 7.34-33 (m, 4H), 7.27-7.24 (m, 1H), 4.50 (d,  $J = 6.0$  Hz, 2H).  $^{13}\text{C}$  NMR (125.4 MHz,  $d_6$ -DMSO):  $\delta$  166.2, 139.7, 134.3, 131.2, 128.28, 128.24, 127.20, 127.17, 126.7, 42.6. MS (EI):  $m/z$  (%) 212 (13), 211 (82), 210 (25), 107 (3), 106 (9), 105



(100), 104 (4), 91 (9), 79 (4), 78 (5), 77 (42), 76 (2), 65 (4), 51 (11), 50 (3). This compound was known: Rattanaburi, P.; Khumraksa, B.; Pattarawarapan, M. *Tetrahedron Lett.* **2012**, 53, 2689-269.

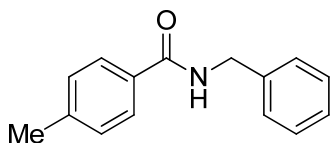

**N-Benzyl 4-methylbenzamide (4ba).**  $^1\text{H}$  NMR (500 MHz,  $\text{CDCl}_3$ ):  $\delta$  7.68 (d,  $J = 8.0$  Hz, 2H), 7.36-7.34 (m, 4H), 7.31-7.28 (m, 1H), 7.22 (d,  $J = 8.0$  Hz, 2H), 6.40 (b, 1H), 4.64 (d,  $J = 6.0$  Hz, 2H), 2.39 (s, 3H).  $^{13}\text{C}$  NMR (125.4 MHz,  $\text{CDCl}_3$ ):  $\delta$  167.3, 142.0, 138.3, 131.6, 129.3, 128.8, 127.9, 127.6, 127.0, 44.1, 21.4. MS (EI):  $m/z$  (%) 226 (6), 225 (41), 120 (7), 119 (100), 107 (2), 92 (2), 91 (28), 89 (2), 77 (2), 65 (6). This compound was known: Muthaiah, S.; Ghosh, S. C.; Jee, J.-E.; Chen, C.; Zhang, J.; Hong, S. H. *J. Org. Chem.* **2010**, 75, 3002-3006.

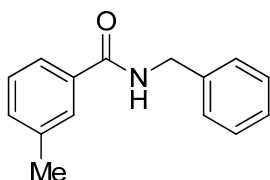

**N-Benzyl 3-methylbenzamide (4ca).**  $^1\text{H}$  NMR (500 MHz,  $\text{CDCl}_3$ ):  $\delta$  7.61 (s, 1H), 7.56-7.54 (m, 1H), 7.34-7.33 (m, 4H), 7.29-7.27 (m, 3H), 6.47 (b, 1H), 4.62 (d,  $J = 5.5$  Hz, 2H), 2.37 (s, 3H).  $^{13}\text{C}$  NMR (125.4 MHz,  $\text{CDCl}_3$ ):  $\delta$  167.5, 138.4, 138.2, 134.4, 132.2, 128.7, 128.4, 127.9, 127.7, 127.6, 123.9, 44.1, 21.3. MS (EI):  $m/z$  (%) 226 (8), 225 (50), 107 (2), 106 (3), 104 (2), 92 (20), 91 (100), 89 (3), 77 (4), 65 (15), 63 (3), 51 (5), 50 (3), 43 (2), 41 (2). This compound was known: De Sarkar, S.; Studer, A. *Org. Lett.* **2010**, 12, 1992-1995.

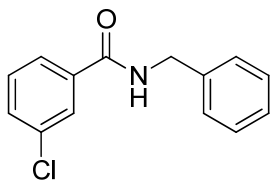

**N-Benzyl 3-chlorobenzamide (4ha).**  $^1\text{H}$  NMR (500 MHz,  $\text{CDCl}_3$ ):  $\delta$  7.77 (t,  $J = 2.0$  Hz, 1H), 7.65 (d,  $J = 7.5$  Hz, 1H), 7.48-7.46 (m, 1H), 7.37-7.33 (m, 5H), 7.32-7.30 (m, 1H), 6.42 (b, 1H), 4.63 (d,  $J = 6.0$  Hz, 2H).  $^{13}\text{C}$  NMR (125.4 MHz,  $\text{CDCl}_3$ ):  $\delta$  166.0, 137.9, 136.2, 134.8, 131.6, 129.9, 128.9, 128.0, 127.8, 127.4, 125.1, 44.3. MS (EI):  $m/z$  (%) 248 (2), 247 (12), 246 (6), 245 (37), 210 (4), 142 (2), 141 (34), 140 (7), 139 (100), 113 (6), 111 (17), 107 (2), 77 (3), 75 (4). This compound was known: De Sarkar, S.; Studer, A. *Org. Lett.* **2010**, 12, 1992-1995.

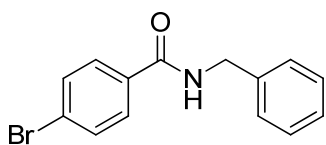

**N-Benzyl 4-bromobenzamide (4ja).**  $^1\text{H}$  NMR (500 MHz,  $\text{CDCl}_3$ ):  $\delta$  7.65 (d,  $J = 8.5$  Hz, 2H), 7.56 (d,  $J = 8.5$  Hz, 2H), 7.38-7.29 (m, 5H), 6.37 (b, 1H), 4.62 (d,  $J = 5.5$  Hz, 2H).  $^{13}\text{C}$  NMR (125.4 MHz,  $\text{CDCl}_3$ ):  $\delta$  166.4, 137.9, 133.2, 131.9, 128.9, 128.6, 128.0, 127.8, 126.3, 44.3. MS (EI):  $m/z$  (%) 292 (8), 291 (51), 290 (9), 289 (53), 186 (8), 185 (99), 184 (8), 183 (100), 157 (25), 155 (25), 108 (3), 107 (4), 106 (4), 104 (5), 77 (8), 76 (13), 75 (7), 50 (3). This compound was known: Ren, W.; Yamane, M. *J. Org. Chem.* **2010**, *75*, 8410-8415.

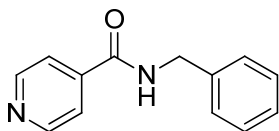

**N-Benzyl isonicotinamide (4oa).**  $^1\text{H}$  NMR (500 MHz,  $\text{CDCl}_3$ ):  $\delta$  8.68 (d,  $J = 5.0$  Hz, 2H), 7.62-7.61 (m, 2H), 7.37-7.31 (m, 5H), 6.81 (b, 1H), 4.63 (d,  $J = 6.0$  Hz, 2H).  $^{13}\text{C}$  NMR (125.4 MHz,  $\text{CDCl}_3$ ):  $\delta$  165.5, 150.5, 141.5, 137.5, 128.9, 128.0, 127.9, 121.0, 44.3. MS (EI):  $m/z$  (%) 213 (15), 212 (100), 211 (23), 183 (2), 168 (2), 155 (3), 107 (6), 106 (54), 104 (7), 91 (10), 79 (10), 78 (22), 77 (6), 65 (3), 51 (8), 50 (2), 28 (3). This compound was known: Kim, B. R.; Lee, H.-G.; Kang, S.-B.; Sung, G. H.; Kim, J.-J.; Park, J. K.; Lee, S.-G.; Yoon, Y.-J. *Synthesis.* **2012**, *44*, 42-50.

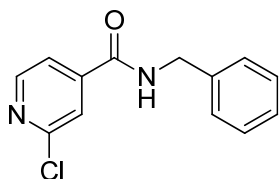

**N-Benzyl 2-chloroisonicotinamide (4pa).**  $^1\text{H}$  NMR (500 MHz,  $\text{CDCl}_3$ ):  $\delta$  8.46 (d,  $J = 5.0$  Hz, 1H), 7.66 (s, 1H), 7.53 (dd,  $J = 5.0$  Hz,  $J = 1.0$  Hz, 1H), 7.38-7.31 (m, 5H), 6.66 (b, 1H), 4.61 (d,  $J = 5.5$  Hz, 2H).  $^{13}\text{C}$  NMR (125.4 MHz,  $\text{CDCl}_3$ ):  $\delta$  164.1, 152.5, 150.5, 144.5, 137.2, 129.0, 128.04, 128.00, 122.0, 119.8, 44.4. MS (EI):  $m/z$  (%) 249 (5), 248 (28), 247 (21), 246 (100), 245 (27), 211 (42), 210 (12), 182 (7), 169 (7), 139 (10), 135 (11), 111 (11), 107 (27), 106 (8), 85 (9), 80 (12), 79 (7), 69 (19), 53 (9), 52 (9). This compound was known: Ferraccioli, R.; Carezzi, D.; Rombola, O.; Catellani, M. *Org. Lett.* **2004**, *6*, 4759-4762.

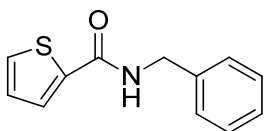

**N-Benzyl thiophene-2-carboxamide (4ra).**  $^1\text{H}$  NMR (500 MHz,  $\text{CDCl}_3$ ):  $\delta$  7.51 (dd,  $J = 3.5$  Hz,  $J = 1.0$  Hz, 1H), 7.47 (dd,  $J = 5.0$  Hz,  $J = 1.0$  Hz, 1H), 7.35-7.34 (m, 4H), 7.32-7.28 (m, 1H), 7.06 (dd,  $J = 4.0$  Hz,  $J = 5.0$  Hz, 1H), 6.31 (b, 1H), 4.61 (d,  $J = 5.5$  Hz, 2H).  $^{13}\text{C}$  NMR (125.4 MHz,  $\text{CDCl}_3$ ):  $\delta$  161.8, 138.8, 138.1, 130.0, 128.8, 128.2, 128.0, 127.7, 127.6, 44.0. MS (EI):  $m/z$  (%) 219 (4), 218 (11), 217 (72), 216 (4), 113 (8), 112 (13), 111 (100), 106 (42), 105 (12), 104 (7), 91 (20), 84 (10), 83

(11), 79 (8), 77 (11), 65 (10), 51 (8), 39 (24). This compound was known: De Sarkar, S.; Studer, A. *Org. Lett.* **2010**, *12*, 1992-1995.

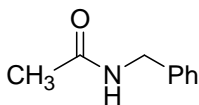

**N-Benzyl acetamide (4sa).**  $^1\text{H}$  NMR (500 MHz,  $\text{CDCl}_3$ ):  $\delta$  7.34-7.31 (m, 2H), 7.28-7.26 (m, 3H), 6.03 (b, 1H), 4.40 (d,  $J = 5.5$  Hz, 2H), 2.00 (s, 3H).  $^{13}\text{C}$  NMR (125.4 MHz,  $\text{CDCl}_3$ ):  $\delta$  169.9, 138.2, 128.7, 127.8, 127.5, 43.7, 23.2. MS (EI):  $m/z$  (%) 150 (8), 149 (80), 148 (4), 107 (23), 106 (100), 104 (6), 92 (4), 91 (34), 89 (3), 79 (14), 78 (6), 77 (12), 65 (7), 51 (8), 43 (32), 39 (5), 30 (10), 15 (3). This compound was known: Atkinson, B. N.; Chhatwal, A. R.; Lomax, H. V.; Walton, J. W.; Williams, J. M. J. *Chem. Commun.* **2012**, *48*, 11626-11628.

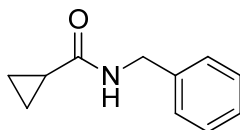

**N-Benzyl cyclopropanecarboxamide (4ta).**  $^1\text{H}$  NMR (500 MHz,  $\text{CDCl}_3$ ):  $\delta$  7.35-7.27 (m, 5H), 5.96 (b, 1H), 4.45 (d,  $J = 6.0$  Hz, 2H), 1.38-1.33 (m, 1H), 1.02-0.99 (m, 2H), 0.76-0.73 (m, 2H).  $^{13}\text{C}$  NMR (125.4 MHz,  $\text{CDCl}_3$ ):  $\delta$  173.4, 138.5, 128.7, 127.9, 127.5, 43.9, 14.8, 7.2. MS (EI):  $m/z$  (%) 176 (8), 175 (56), 174 (13), 160 (6), 146 (9), 132 (10), 131 (26), 130 (8), 117 (12), 116 (7), 107 (8), 106 (48), 105 (12), 104 (100), 92 (8), 91 (94), 79 (12), 77 (18), 69 (45), 65 (22), 59 (12), 55 (9), 51 (15), 50 (6), 41 (57), 39 (34), 28 (12), 27 (5). This compound was known: Rolfe, A.; Probst, D. A.; Volp, K. A.; Omar, I.; Flynn, D. L.; Hanson, P. R. *J. Org. Chem.* **2008**, *73*, 8785-8790.

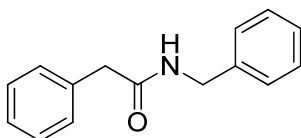

**N-Benzyl 2-phenylacetamide (4ua).**  $^1\text{H}$  NMR (500 MHz,  $\text{CDCl}_3$ ):  $\delta$  7.36-7.24 (m, 8H), 7.17 (d,  $J = 7.0$  Hz, 2H), 5.73 (b, 1H), 4.41 (d,  $J = 6.0$  Hz, 2H), 3.62 (s, 2H).  $^{13}\text{C}$  NMR (125.4 MHz,  $\text{CDCl}_3$ ):  $\delta$  170.8, 138.1, 134.8, 129.5, 129.1, 128.7, 127.5, 127.44, 127.42, 43.9, 43.6. MS (EI):  $m/z$  (%) 226 (8), 225 (50), 107 (2), 106 (3), 104 (2), 92 (20), 91 (100), 89 (3), 77 (4), 65 (15), 63 (3), 51 (5), 50 (2), 43 (2), 41 (2). This compound was known: Muthaiah, S.; Ghosh, S. C.; Jee, J.-E.; Chen, C.; Zhang, J.; Hong, S. H. *J. Org. Chem.* **2010**, *75*, 3002-3006.

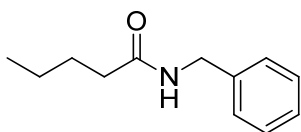

**N-Benzyl pentanamide (4wa).**  $^1\text{H}$  NMR (500 MHz,  $\text{CDCl}_3$ ):  $\delta$  7.34-7.26 (m, 5H), 5.82 (b, 1H), 4.42

(d,  $J = 6.0$  Hz, 2H), 2.21 (t,  $J = 7.5$  Hz, 2H), 1.67-1.61 (m, 2H), 1.39-1.33 (m, 2H), 0.92 (t,  $J = 7.5$  Hz, 2H).  $^{13}\text{C}$  NMR (125.4 MHz,  $\text{CDCl}_3$ ):  $\delta$  173.0, 138.5, 128.7, 127.8, 127.5, 43.6, 36.5, 27.9, 22.4, 13.8. MS (EI):  $m/z$  (%) 192 (6), 191 (42), 148 (18), 130 (3), 107 (33), 106 (100), 105 (13), 104 (4), 103 (3), 92 (3), 91 (29), 85 (2), 79 (10), 77 (4), 65 (4), 58 (5), 43 (10), 42 (3), 28 (2). This compound was known: Sabot, C.; Kumar, K. A.; Meunier, S.; Mioskowski, C. *Tetrahedron Lett.* **2007**, *48*, 3863-3866.

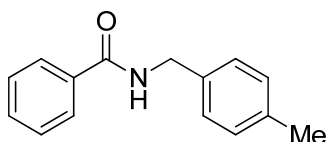

***N*-(4-Methylbenzyl) benzamide (4ab).**  $^1\text{H}$  NMR (500 MHz,  $\text{CDCl}_3$ ):  $\delta$  7.78 (d,  $J = 7.0$  Hz, 2H), 7.51-7.48 (m, 1H), 7.42-7.40 (m, 2H), 7.26-7.24 (m, 2H), 7.16 (d,  $J = 8.0$  Hz, 2H), 6.41 (b, 1H), 4.60 (d,  $J = 5.5$  Hz, 2H), 2.35 (s, 3H).  $^{13}\text{C}$  NMR (125.4 MHz,  $\text{CDCl}_3$ ):  $\delta$  167.3, 137.4, 135.1, 134.5, 131.5, 129.5, 128.6, 128.0, 126.9, 44.0, 21.1. MS (EI):  $m/z$  (%) 226 (8), 225 (44), 210 (10), 156 (22), 120 (8), 113 (6), 106 (10), 105 (100), 104 (28), 79 (6), 78 (10), 77 (58), 56 (8), 51 (17), 50 (5), 42 (7). This compound was known: Maki, T.; Ishihara, K.; Yamamoto, H. *Tetrahedron.* **2007**, *63*, 8645-8657.

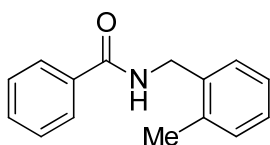

***N*-(2-Methylbenzyl) benzamide (4ac).**  $^1\text{H}$  NMR (500 MHz,  $\text{CDCl}_3$ ):  $\delta$  7.77 (d,  $J = 7.0$  Hz, 2H), 7.48-7.46 (m, 1H), 7.42-7.39 (m, 2H), 7.28 (d,  $J = 7.0$  Hz, 1H), 7.22-7.18 (m, 3H), 6.35 (b, 1H), 4.61 (d,  $J = 5.5$  Hz, 2H), 2.36 (s, 3H).  $^{13}\text{C}$  NMR (125.4 MHz,  $\text{CDCl}_3$ ):  $\delta$  167.3, 136.6, 135.8, 134.4, 131.5, 130.6, 128.7, 128.6, 127.9, 127.0, 126.3, 42.3, 19.1. MS (EI):  $m/z$  (%) 226 (8), 225 (44), 210 (10), 156 (22), 120 (8), 113 (6), 106 (10), 105 (100), 104 (28), 103 (6), 79 (6), 78 (10), 77 (58), 56 (8), 51 (17), 50 (5), 42(7), 39(4). This compound was known: Molander, G.; Hiebel, M.-A. *Org. Lett.* **2010**, *12*, 4876-4879.

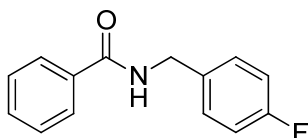

***N*-(4-Fluorobenzyl) benzamide (4ad).**  $^1\text{H}$  NMR (500 MHz,  $\text{CDCl}_3$ ):  $\delta$  7.78 (d,  $J = 7.0$  Hz, 2H), 7.52-7.49 (m, 1H), 7.45-7.42 (m, 2H), 7.34-7.31 (m, 2H), 7.05-7.01 (m, 2H), 6.44 (b, 1H), 4.61 (d,  $J = 6.0$  Hz, 2H).  $^{13}\text{C}$  NMR (125.4 MHz,  $\text{CDCl}_3$ ):  $\delta$  167.4, 162.3 (d,  $J_{\text{C-F}} = 245.3$  Hz), 134.3, 134.1 (d,  $J_{\text{C-F}} = 3.3$  Hz), 131.7, 129.6 (d,  $J_{\text{C-F}} = 8.2$  Hz), 128.6, 126.9, 115.6 (d,  $J_{\text{C-F}} = 21.4$  Hz), 43.4. MS (EI):

m/z (%) 230 (3), 229 (20), 228 (7), 200 (6), 108 (7), 106 (7), 105 (100), 104 (8), 103 (7), 77 (47), 76 (5), 70 (7), 67 (8), 57 (7), 55 (11), 54 (6), 51 (10), 43 (12), 41 (14), 39 (8). This compound was known: Dube, D.; Scholte, A. A. *Tetrahedron Lett.* **1999**, *40*, 2295-2298.

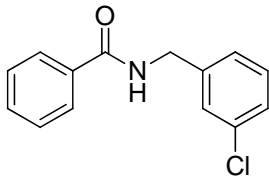

**N-(3-Chlorobenzyl) benzamide (4ae).**  $^1\text{H}$  NMR (500 MHz,  $\text{CDCl}_3$ ):  $\delta$  7.79 (d,  $J = 7.5$  Hz, 2H), 7.52-7.50 (m, 1H), 7.45-7.42 (m, 2H), 7.33 (s, 1H), 7.27-7.22 (m, 3H), 6.58 (b, 1H), 4.61 (d,  $J = 5.5$  Hz, 2H).  $^{13}\text{C}$  NMR (125.4 MHz,  $\text{CDCl}_3$ ):  $\delta$  167.4, 140.3, 134.6, 134.1, 131.7, 130.0, 128.6, 127.8, 127.7, 126.9, 125.9, 43.4. MS (EI): m/z (%) 247 (5), 246 (2), 245 (14), 211 (10), 210 (63), 106 (8), 105 (100), 78 (4), 77 (46), 76 (2), 51 (8). This compound was known: Julius, V. B.; Kuhn, M.; Weismantel, J. J. *Liebigs. Annalen. der. Chem.* **1926**, *449*, 249-77.

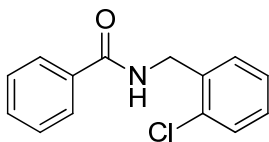

**N-(2-Chlorobenzyl) benzamide (4af).**  $^1\text{H}$  NMR (500 MHz,  $\text{CDCl}_3$ ):  $\delta$  7.78 (d,  $J = 7.0$  Hz, 2H), 7.51-7.37 (m, 5H), 7.25-7.23 (m, 2H), 6.67 (b, 1H), 4.74-4.72 (m, 2H).  $^{13}\text{C}$  NMR (125.4 MHz,  $\text{CDCl}_3$ ):  $\delta$  167.4, 135.7, 134.4, 133.8, 131.7, 130.6, 129.7, 129.2, 128.7, 127.3, 127.1, 42.2. MS (EI): m/z (%) 247 (5), 246 (2), 245 (14), 211 (10), 210 (63), 106 (8), 105 (100), 78 (4), 77 (46), 76 (2), 51 (8). This compound was known: Qu, G.-R.; Song, Y.-W.; Niu, H.-Y.; Guo, H.-M.; Fossey, J. S. *RSC. Adv.* **2012**, *2*, 6161-6163.

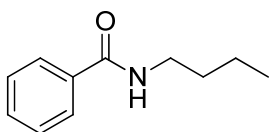

**N-Butyl benzamide (4ag).**  $^1\text{H}$  NMR (500 MHz,  $d_6$ -DMSO):  $\delta$  8.44 (b, 1H), 7.85-7.83 (m, 2H), 7.53-7.50 (m, 1H), 7.47-7.44 (m, 2H), 3.29-3.25 (m, 2H), 1.54-1.48 (m, 2H), 1.37-1.29 (m, 2H), 0.91 (t,  $J = 7.5$  Hz, 3H).  $^{13}\text{C}$  NMR (125.4 MHz,  $d_6$ -DMSO):  $\delta$  166.1, 134.7, 130.9, 128.2, 127.1, 38.8, 31.2, 19.6, 13.7. MS (EI): m/z (%) 178 (2), 177 (13), 176 (2), 148 (4), 136 (3), 135 (15), 134 (11), 106 (8), 105 (100), 78 (3), 77 (32), 76 (2), 51 (9), 50 (3). This compound was known: Rattanaburi, P.; Khumraksa, B.; Pattarawarapan, M. *Tetrahedron Lett.* **2012**, *53*, 2689-269.

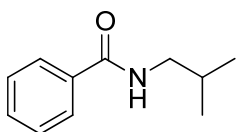

**N-Isobutyl benzamide (4ah).**  $^1\text{H}$  NMR (500 MHz,  $\text{CDCl}_3$ ):  $\delta$  7.77 (d,  $J = 7.5$  Hz, 2H), 7.48-7.45 (m, 1H), 7.40-7.37 (m, 2H), 6.61 (b, 1H), 3.25 (t,  $J = 6.5$  Hz, 2H), 1.92-1.86 (m, 1H), 0.95 (d,  $J = 7.0$  Hz, 6H).  $^{13}\text{C}$  NMR (125.4 MHz,  $\text{CDCl}_3$ ):  $\delta$  167.8, 134.9, 131.3, 128.5, 126.9, 47.4, 28.6, 20.2. MS (EI):  $m/z$  (%) 225 (9), 134 (8), 121 (2), 106 (4), 105 (53), 104 (23), 92 (4), 91 (11), 77 (21), 65 (5), 51 (6), 39 (3), 38 (4), 36 (11), 30 (100), 28 (2). This compound was known: Thomas, G. L.; Boehner, C.; Ladlow, M.; Spring, D. R. *Tetrahedron*. **2005**, *61*, 12153-12159.

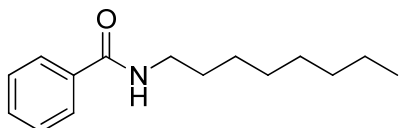

**N-Octyl benzamide (4ai).**  $^1\text{H}$  NMR (500 MHz,  $\text{CDCl}_3$ ):  $\delta$  7.75 (d,  $J = 7.0$  Hz, 2H), 7.50-7.46 (m, 1H), 7.43-7.40 (m, 2H), 6.25 (b, 1H), 3.46-3.42 (m, 2H), 1.64-1.58 (m, 2H), 1.31-1.27 (m, 10H), 0.88 (t,  $J = 7.0$  Hz, 3H).  $^{13}\text{C}$  NMR (125.4 MHz,  $\text{CDCl}_3$ ):  $\delta$  167.5, 134.9, 131.3, 128.5, 126.8, 40.1, 31.8, 29.7, 29.3, 29.2, 27.0, 22.6, 14.1. MS (EI):  $m/z$  (%) 190 (2), 176 (7), 162 (8), 149 (3), 148 (10), 135 (26), 134 (22), 122 (7), 106 (8), 105 (100), 79 (2), 78 (2), 77 (31), 55 (7), 51 (5), 43 (12), 41 (12). This compound was known: Morcillo, S. P.; Alvarez, L.; Mota, A. J.; Justicia, J.; Robles, R. *J. Org. Chem.* **2011**, *76*, 2277-2281.

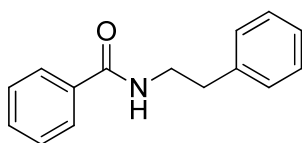

**N-(2-Phenethyl) benzamide (4aj).**  $^1\text{H}$  NMR (500 MHz,  $d_6$ -DMSO):  $\delta$  8.55 (t,  $J = 5.5$  Hz, 1H), 7.81 (d,  $J = 7.0$  Hz, 2H), 7.53-7.50 (m, 1H), 7.47-7.44 (m, 2H), 7.31-7.28 (m, 2H), 7.24 (d,  $J = 7.0$  Hz, 2H), 7.22-7.19 (m, 1H), 3.51-3.47 (m, 2H), 2.85 (t,  $J = 7.5$  Hz, 2H).  $^{13}\text{C}$  NMR (125.4 MHz,  $d_6$ -DMSO):  $\delta$  166.2, 139.5, 134.6, 131.0, 128.6, 128.3, 128.2, 127.1, 126.0, 40.8, 35.1. MS (EI):  $m/z$  (%) 225 (9), 134 (8), 121 (2), 106 (4), 105 (53), 104 (23), 92 (4), 91 (11), 77 (21), 65 (5), 51 (6), 39 (3), 38 (4), 36 (11), 30 (100), 28 (2). This compound was known: Arora, J. S.; Kaur, N.; Phanstiel, Otto, IV. *J. Org. Chem.* **2008**, *73*, 6182-6186.

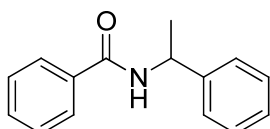

**N-(1-Phenylethyl) benzamide (4ak).**  $^1\text{H}$  NMR (500 MHz,  $\text{CDCl}_3$ ):  $\delta$  7.77 (d,  $J = 7.0$  Hz, 2H), 7.51-7.48 (m, 1H), 7.44-7.35 (m, 6H), 7.30-7.28 (m, 1H), 6.31 (b, 1H), 5.38-5.32 (m, 1H), 1.61 (d,  $J = 7.0$  Hz, 3H).  $^{13}\text{C}$  NMR (125.4 MHz,  $\text{CDCl}_3$ ):  $\delta$  166.6, 143.1, 134.6, 131.5, 128.8, 128.6, 127.5, 126.9, 126.3, 49.2, 21.7. MS (EI):  $m/z$  (%) 225 (9), 134 (8), 121 (2), 106 (4), 105 (53), 104 (23), 92

(4), 91 (11), 77 (21), 65 (5), 51 (6), 39 (3), 38 (4), 36 (11), 30 (100), 28 (2). This compound was known: Liu, X.; Zhang, Y.; Wang, L.; Fu, H.; Jiang, Y.; Zhao, Y. *J. Org. Chem.* **2008**, *73*, 6207-6212.

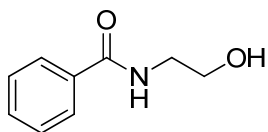

**N-(2-Hydroxyethyl) benzamide (4al).**  $^1\text{H}$  NMR (500 MHz,  $\text{CDCl}_3$ ):  $\delta$  7.74 (d,  $J = 7.5$  Hz, 2H), 7.45-7.42 (m, 1H), 7.34-7.31 (m, 2H), 4.38 (b, 1H), 3.72 (t,  $J = 5.0$  Hz, 2H), 3.53-3.50 (m, 2H), 3.15 (b, 1H).  $^{13}\text{C}$  NMR (125.4 MHz,  $\text{CDCl}_3$ ):  $\delta$  168.9, 134.0, 131.6, 128.5, 127.0, 61.5, 42.7. MS (EI):  $m/z$  (%) 165 (2), 147 (14), 135 (4), 134 (9), 122 (20), 117 (8), 106 (9), 105 (100), 104 (3), 78 (6), 77 (67), 76 (5), 51 (28), 50 (10), 40 (4), 33 (9), 32 (4), 31 (3). This compound was known: Denton, R. M.; An, J.; Adeniran, B.; Blake, A. J.; Lewis, W.; Poulton, A. M. *J. Org. Chem.* **2011**, *76*, 6749-6767.

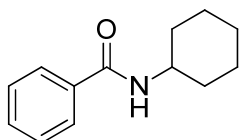

**N-Cyclohexyl benzamide (4am).**  $^1\text{H}$  NMR (500 MHz,  $\text{CDCl}_3$ ):  $\delta$  7.75 (d,  $J = 7.5$  Hz, 2H), 7.50-7.40 (m, 3H), 5.99 (b, 1H), 4.01-3.95 (m, 1H), 2.05-2.02 (m, 2H), 1.90-1.74 (m, 2H), 1.67-1.64 (m, 1H), 1.48-1.39 (m, 2H), 1.28-1.20 (m, 3H).  $^{13}\text{C}$  NMR (125.4 MHz,  $\text{CDCl}_3$ ):  $\delta$  166.6, 135.2, 131.2, 128.5, 126.8, 48.7, 33.2, 25.6, 24.9. MS (EI):  $m/z$  (%) 176 (4), 175 (36), 174 (28), 146 (8), 106 (7), 105 (100), 78 (4), 77 (49), 70 (9), 68 (4), 55 (4), 51 (16), 50 (6), 44 (4), 43 (6), 41 (16). This compound was known: Rattanaburi, P.; Khumraksa, B.; Pattarawarapan, M. *Tetrahedron Lett.* **2012**, *53*, 2689-269.

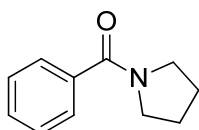

**N-Benzoyl pyrrolidine (4an).**  $^1\text{H}$  NMR (500 MHz,  $\text{CDCl}_3$ ):  $\delta$  7.48-7.46 (m, 2H), 7.35-7.34 (m, 3H), 3.60 (t,  $J = 7.0$  Hz, 2H), 3.37 (t,  $J = 6.5$  Hz, 2H), 1.94-1.88 (m, 2H), 1.85-1.79 (m, 2H).  $^{13}\text{C}$  NMR (125.4 MHz,  $\text{CDCl}_3$ ):  $\delta$  169.7, 137.2, 129.7, 128.2, 127.0, 49.6, 46.1, 26.3, 24.4. MS (EI):  $m/z$  (%) 176 (5), 175 (34), 174 (23), 147 (3), 146 (17), 106 (9), 105 (100), 104 (13), 78 (5), 77 (55), 76 (2), 70 (4), 56 (2), 51 (12), 50 (3). This compound was known: Rolfe, A.; Probst, D. A.; Volp, K. A.; Omar, I.; Flynn, D. L.; Hanson, P. R. *J. Org. Chem.* **2008**, *73*, 8785-8790.

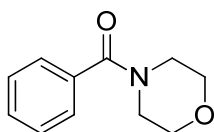

**N-Benzoyl morpholine (4ao).**  $^1\text{H}$  NMR (500 MHz,  $\text{CDCl}_3$ ):  $\delta$  7.44-7.41 (m, 5H), 3.79-3.46 (m, 8H).

$^{13}\text{C}$  NMR (125.4 MHz,  $\text{CDCl}_3$ ):  $\delta$  170.5, 135.3, 129.9, 128.6, 127.1, 66.9, 48.2, 42.6. MS (EI):  $m/z$  (%) 191 (4), 176 (13), 148 (4), 134 (7), 106 (7), 105 (100), 78 (3), 77 (29), 57 (5), 56 (5), 51 (9), 41 (8), 39 (4), 29 (5), 27 (3). This compound was known: Luo, Q.-L.; Lu, L.; Li, Y.; Tan, J.-P.; Nan, W.; Hui, Q. *Eur. J. Org. Chem.* **2011**, *34*, 6916–6922.

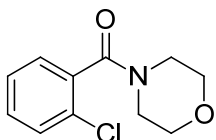

**N-(2-Chlorobenzoyl) morpholine (4io).**  $^1\text{H}$  NMR (500 MHz,  $\text{CDCl}_3$ ):  $\delta$  8.15 (dd,  $J = 8.0$  Hz,  $J = 1.5$  Hz, 1H), 7.51–7.47 (m, 1H), 7.27–7.21 (m, 2H), 3.88 (t,  $J = 4.5$  Hz, 4H), 3.04 (t,  $J = 4.5$  Hz, 4H).  $^{13}\text{C}$  NMR (125.4 MHz,  $\text{CDCl}_3$ ):  $\delta$  168.7, 151.2, 132.6, 131.9, 127.5, 124.9, 120.1, 67.4, 53.6. MS (EI):  $m/z$  (%) 226 (4), 225 (6), 224 (10), 210 (4), 190 (5), 162 (3), 141 (34), 140 (7), 139 (100), 113 (8), 111 (23), 86 (23), 77 (3), 76 (3), 75 (10), 56 (16), 42 (3). This compound was known: Lysén, M.; Kelleher, S.; Begtrup, M.; Kristensen, J. L. *J. Org. Chem.* **2005**, *70*, 5342–5343.

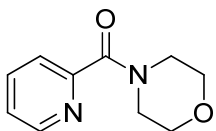

**N-(2-Pyridinoyl) morpholine (4mo).**  $^1\text{H}$  NMR (500 MHz,  $\text{CDCl}_3$ ):  $\delta$  8.57–8.56 (m, 1H), 7.82–7.78 (m, 1H), 7.66 (d,  $J = 8.0$  Hz, 1H), 7.36–7.33 (m, 1H), 3.80 (b, 4H), 3.69–3.63 (m, 4H).  $^{13}\text{C}$  NMR (125.4 MHz,  $\text{CDCl}_3$ ):  $\delta$  167.5, 153.6, 148.3, 137.2, 124.7, 124.2, 67.0, 66.8, 47.8, 42.8. MS (EI):  $m/z$  (%) 149 (3), 107 (3), 106 (19), 94 (5), 93 (4), 87 (7), 86 (100), 79 (3), 78 (6), 72 (3), 65 (3), 58 (12), 56 (5), 51 (3), 42 (6), 30 (9), 29 (5), 27 (3). This compound was known: Wang, X.; Wang, D. Z. *Tetrahedron.* **2011**, *67*, 3406–3411.

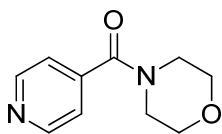

**N-(4-Pyridinoyl) morpholine (4oo).**  $^1\text{H}$  NMR (500 MHz,  $\text{CDCl}_3$ ):  $\delta$  8.71 (dd,  $J = 4.0$  Hz,  $J = 1.5$  Hz, 2H), 7.30 (dd,  $J = 4.0$  Hz,  $J = 1.5$  Hz, 2H), 3.80 (b, 4H), 3.63 (b, 2H), 3.39 (b, 2H).  $^{13}\text{C}$  NMR (125.4 MHz,  $\text{CDCl}_3$ ):  $\delta$  167.7, 150.3, 142.9, 121.2, 66.7, 47.8, 42.4. MS (EI):  $m/z$  (%) 192 (34), 191 (55), 177 (52), 161 (14), 149 (7), 135 (6), 107 (10), 106 (100), 93 (7), 86 (39), 79 (8), 78 (68), 56 (70), 51 (41), 50 (9), 42 (10), 29 (7), 28 (12). This compound was known: Wang, X.; Wang, D. Z. *Tetrahedron.* **2011**, *67*, 3406–3411.

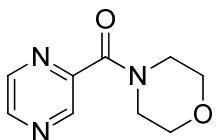



***N*-(2-Pyrazinzoyl) morpholine (4qo)**. <sup>1</sup>H NMR (500 MHz, CDCl<sub>3</sub>): δ 8.92 (d, *J* = 1.0 Hz, 1H), 8.60 (d, *J* = 2.5 Hz, 1H), 8.50 (dd, *J* = 2.0 Hz, *J* = 1.5 Hz, 1H), 3.77 (b, 4H), 3.67-3.63 (m, 4H). <sup>13</sup>C NMR (125.4 MHz, CDCl<sub>3</sub>): δ 165.0, 148.8, 145.9, 145.4, 142.4, 66.9, 66.7, 47.6, 42.8. MS (EI): *m/z* (%) 193 (9), 175 (5), 109 (5), 108 (46), 86 (100), 81 (18), 80 (44), 79 (29), 77 (9), 56 (7), 55 (7), 53 (10), 41 (19), 39 (12), 27 (11). This compound was known: Takács, A.; Jakab, B.; Petz, A.; Kollár, L. *Tetrahedron*. **2007**, *63*, 10372-10378.

# <sup>1</sup>H NMR and <sup>13</sup>C NMR Spectra of the Products

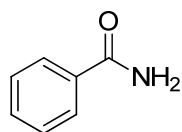

2a

## <sup>1</sup>H NMR

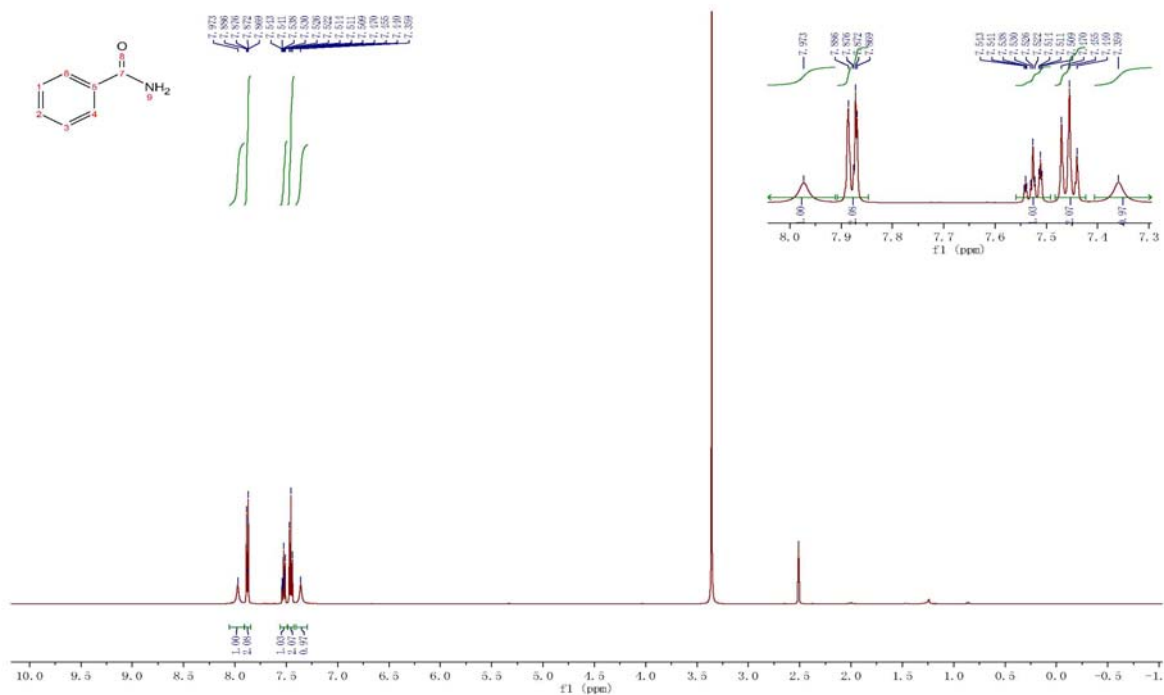

## <sup>13</sup>C NMR

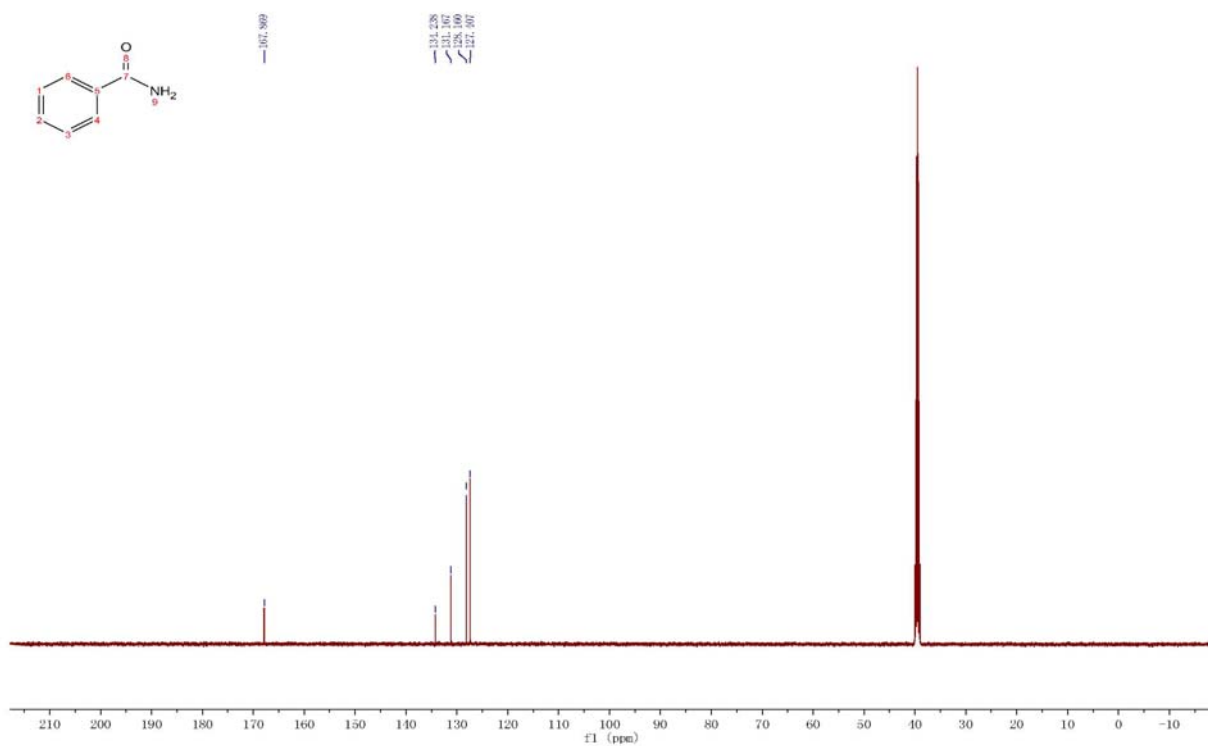

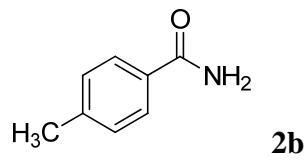

**<sup>1</sup>H NMR**

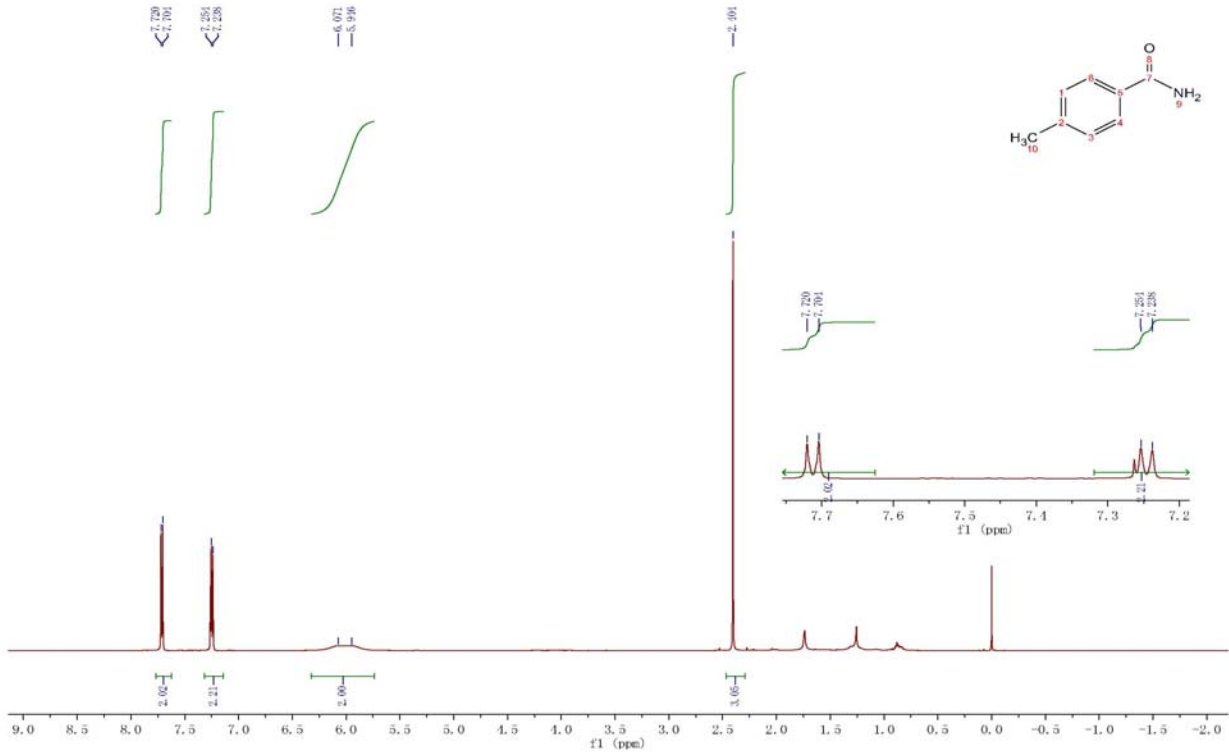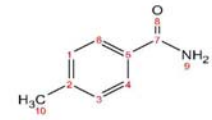

**<sup>13</sup>C NMR**

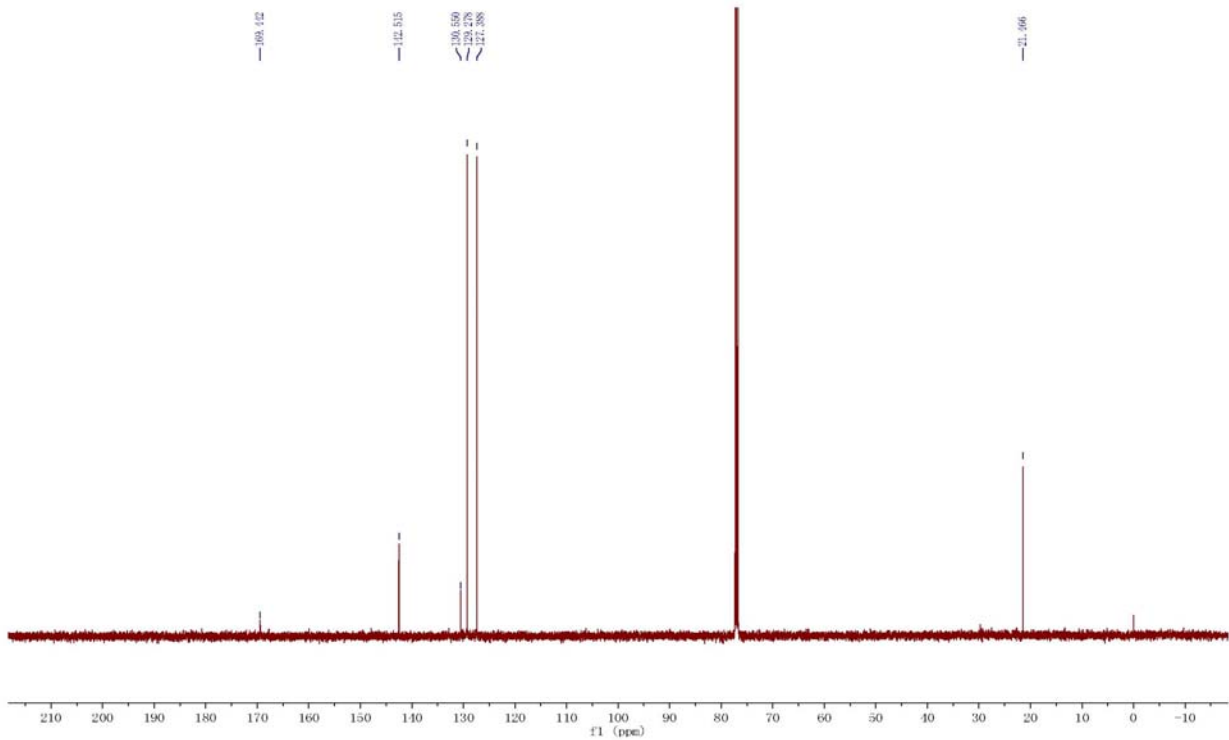

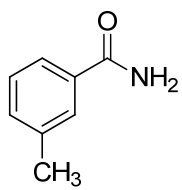

<sup>1</sup>H NMR

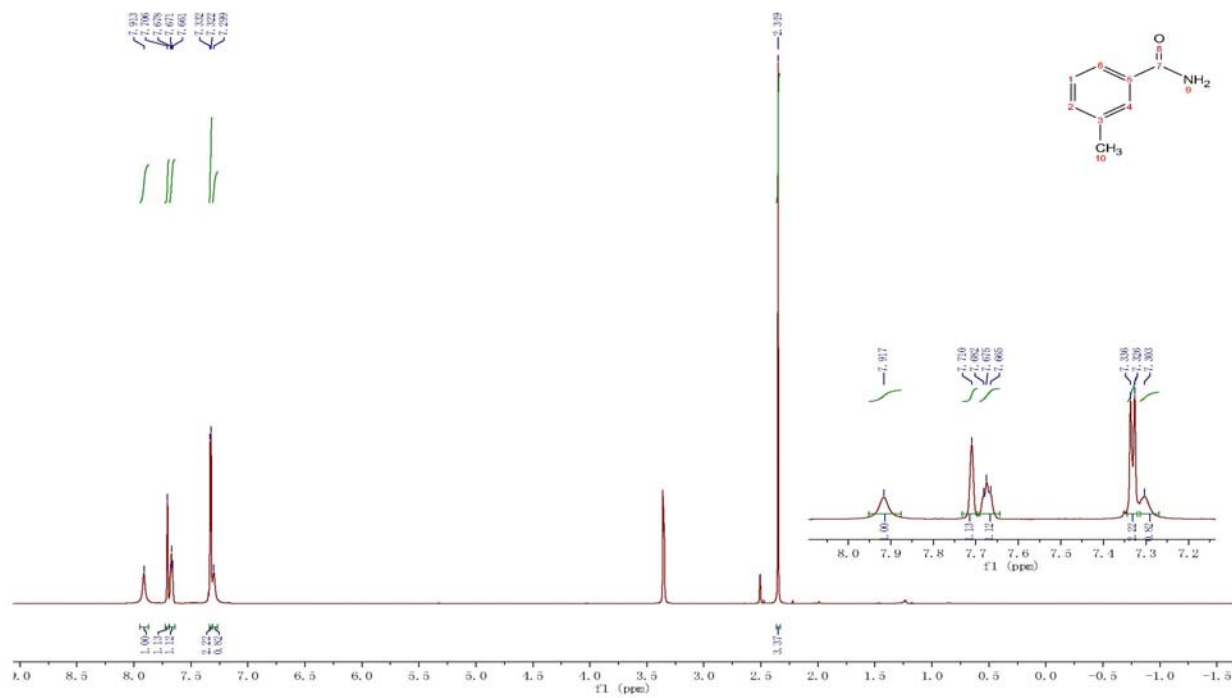

<sup>13</sup>C NMR

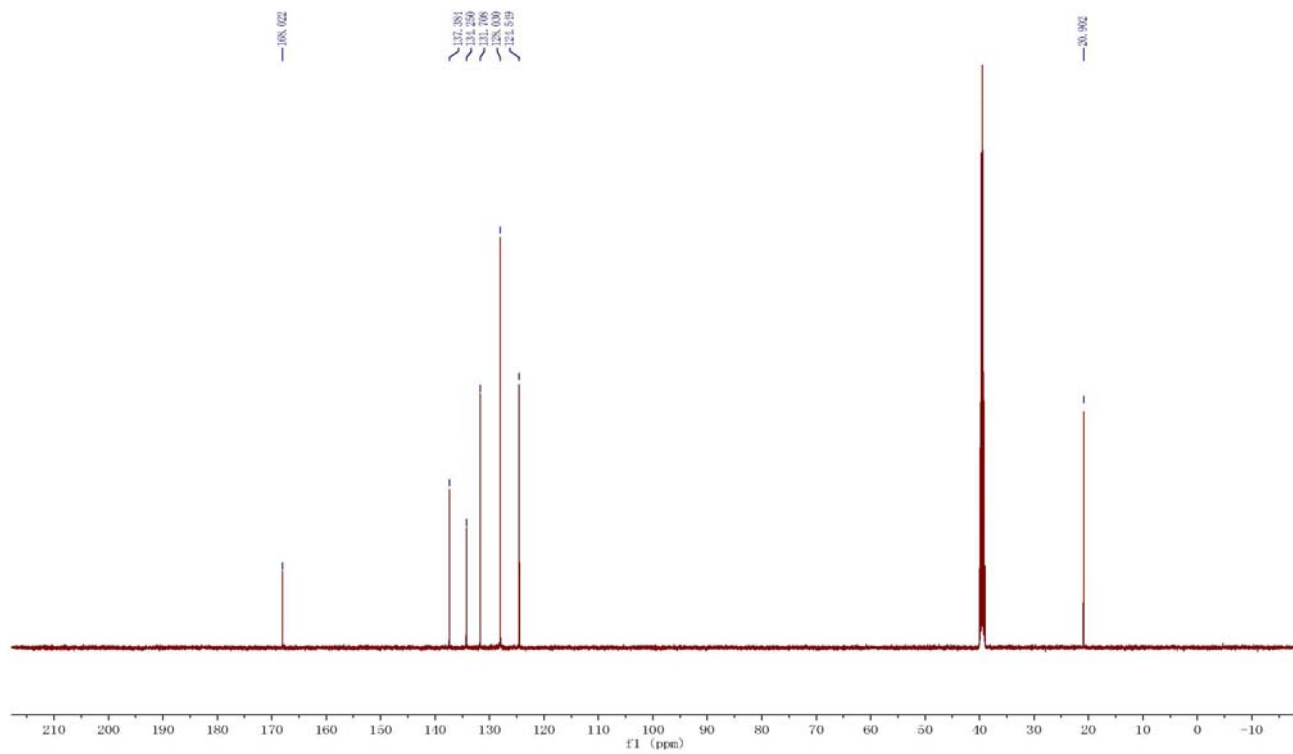

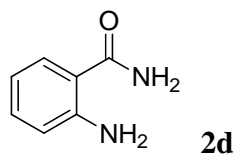

**<sup>1</sup>H NMR**

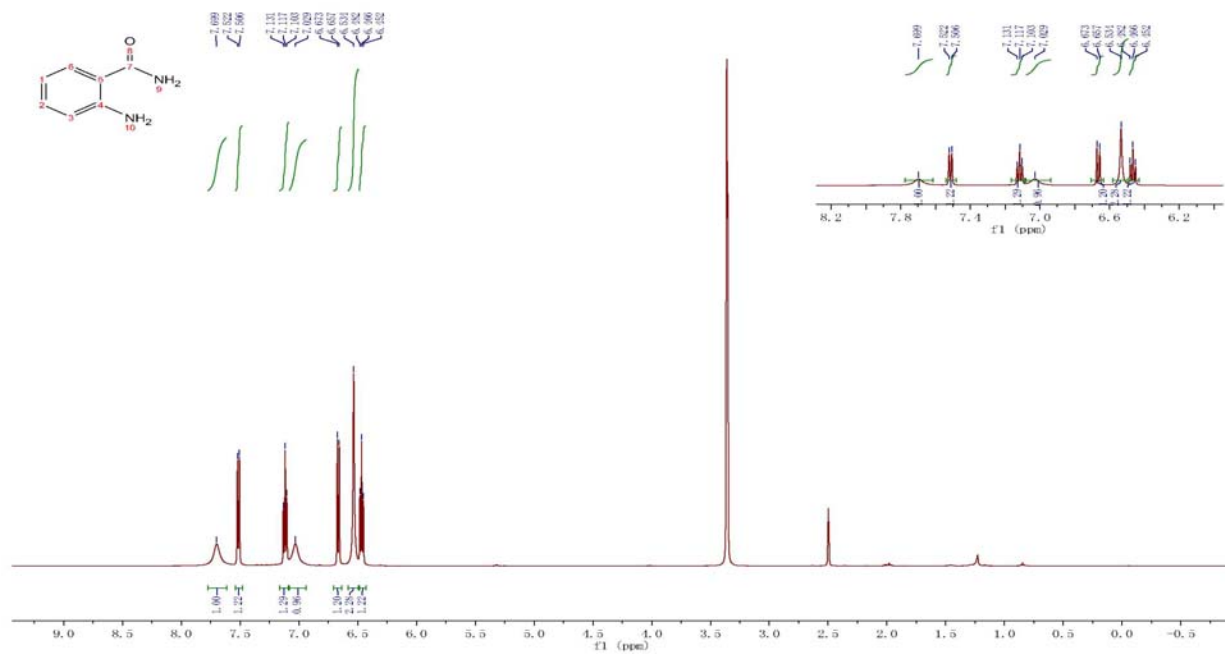

**<sup>13</sup>C NMR**

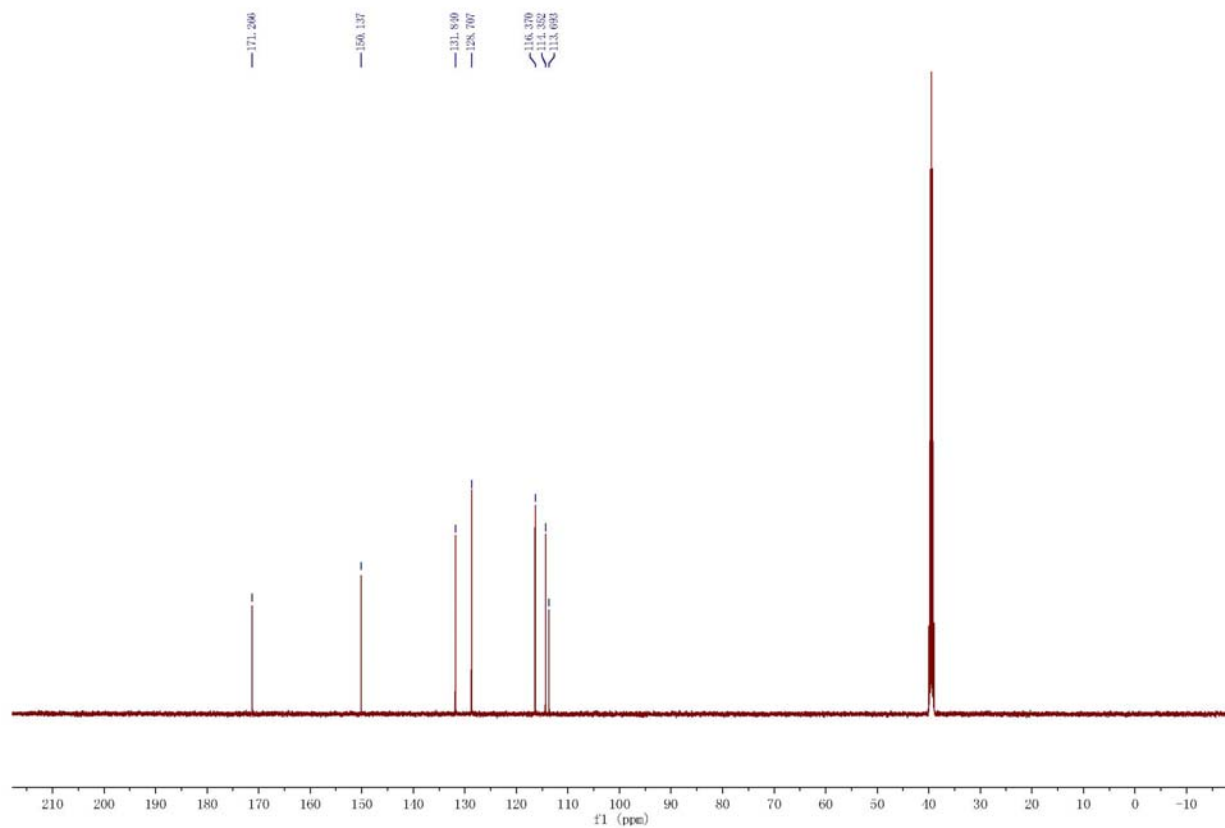

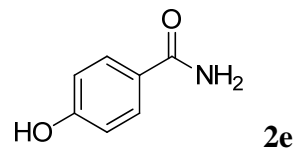

**<sup>1</sup>H NMR**

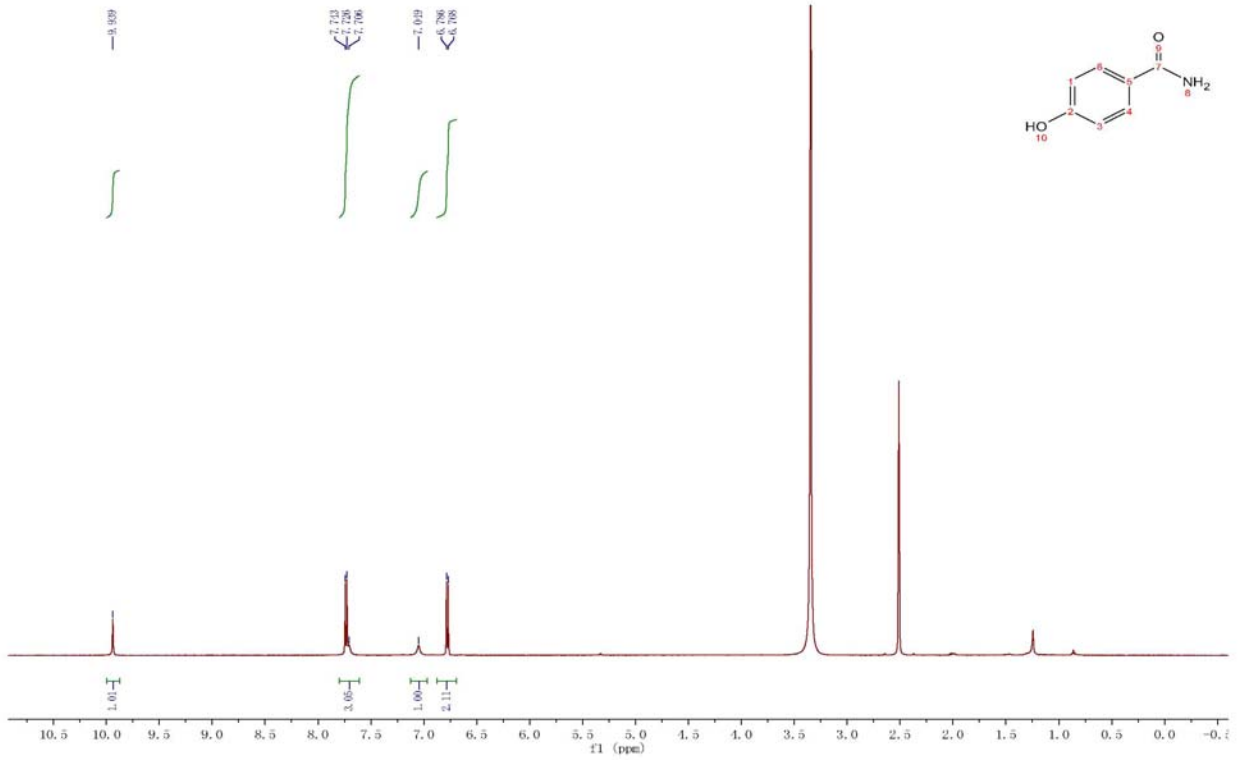

**<sup>13</sup>C NMR**

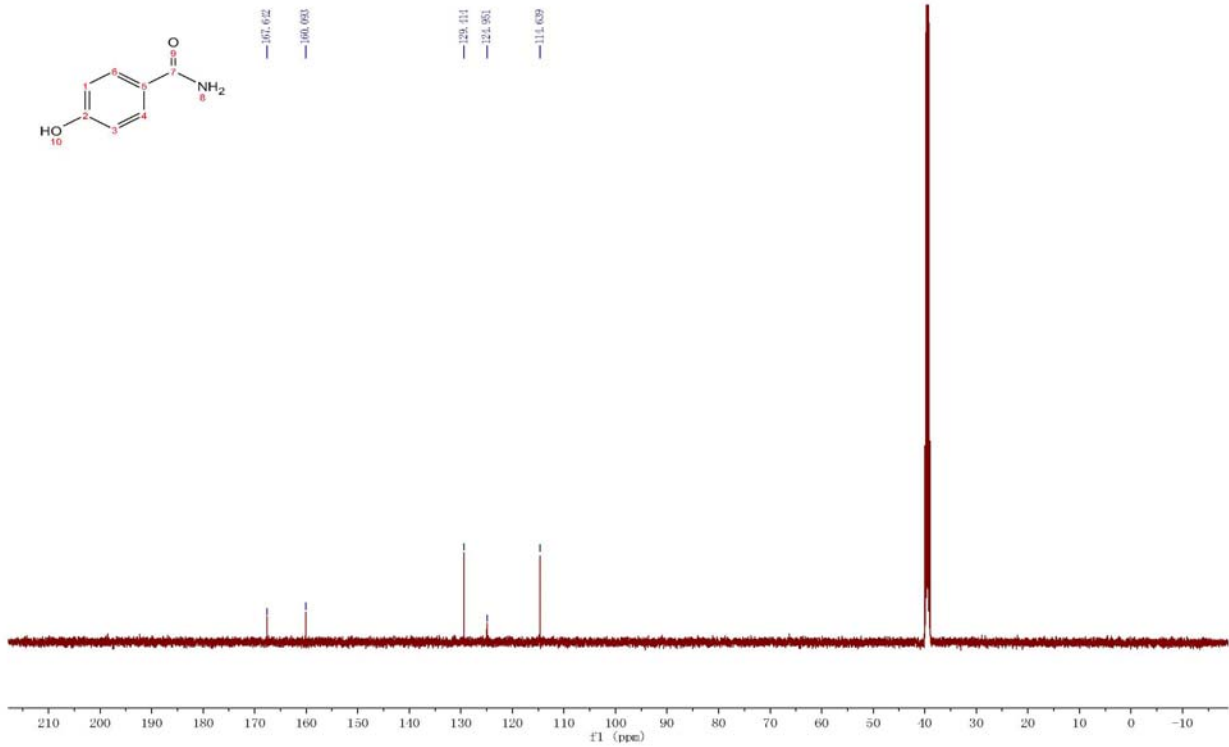

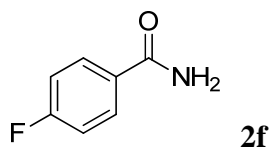

**<sup>1</sup>H NMR**

7.984  
 7.958  
 7.955  
 7.950  
 7.941  
 7.934  
 7.930  
 7.927  
 7.376  
 7.285  
 7.269  
 7.252

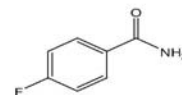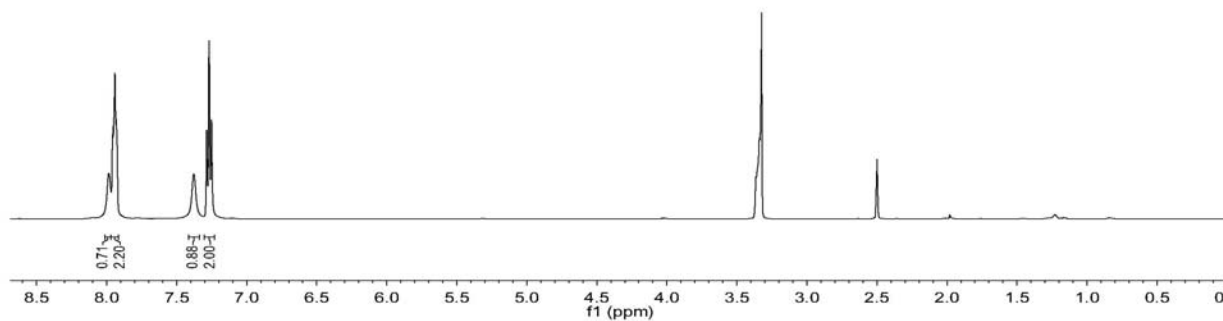

**<sup>13</sup>C NMR**

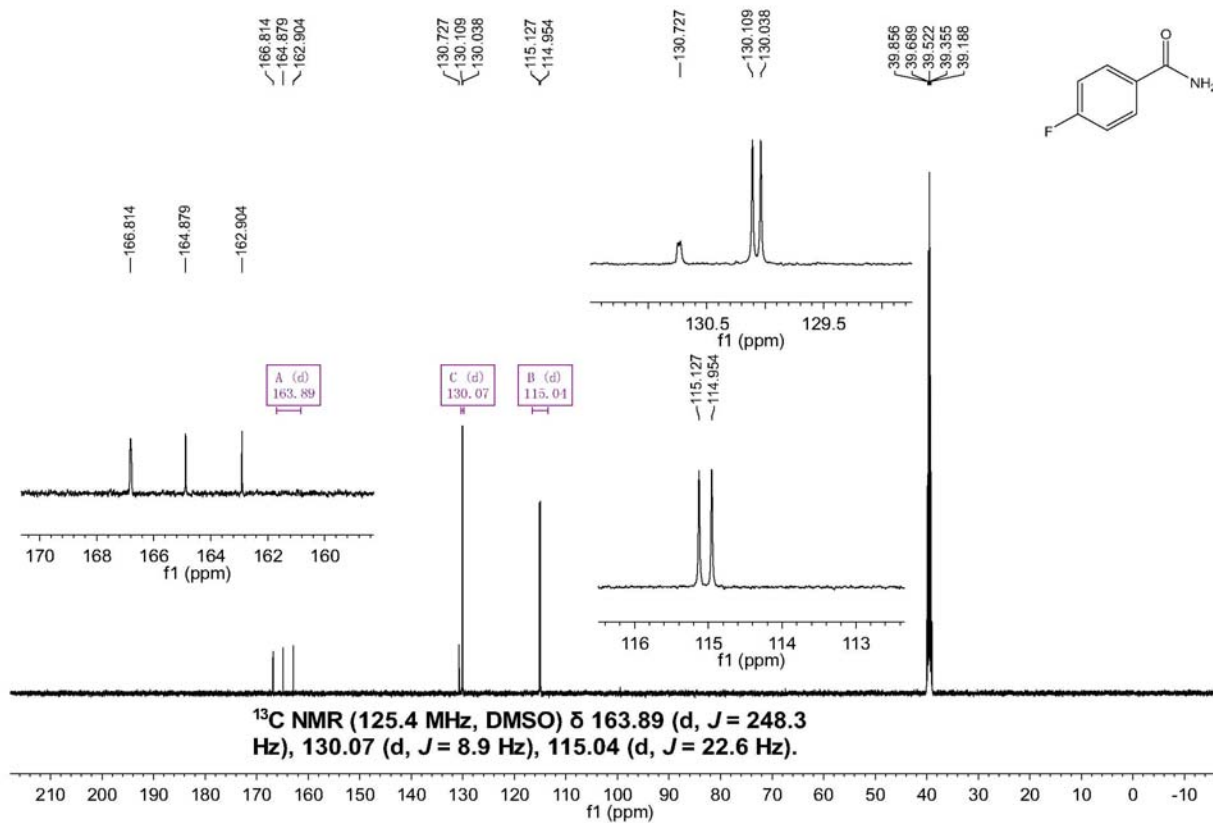

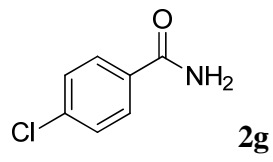

**<sup>1</sup>H NMR**

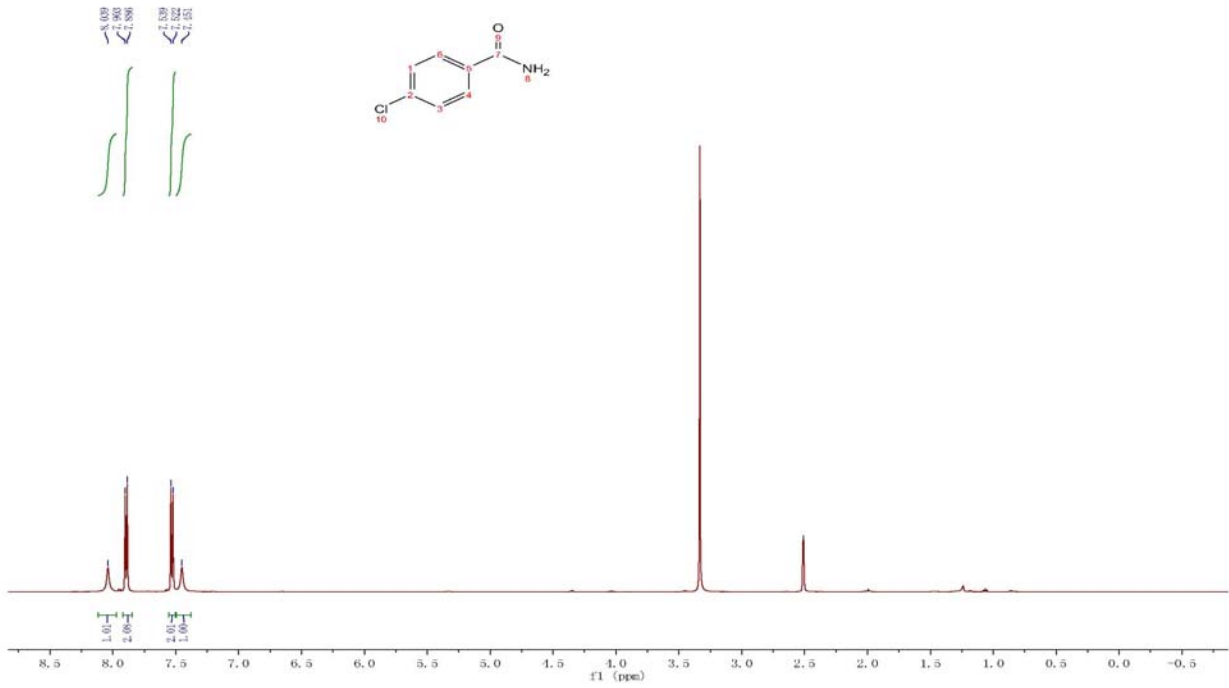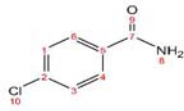

**<sup>13</sup>C NMR**

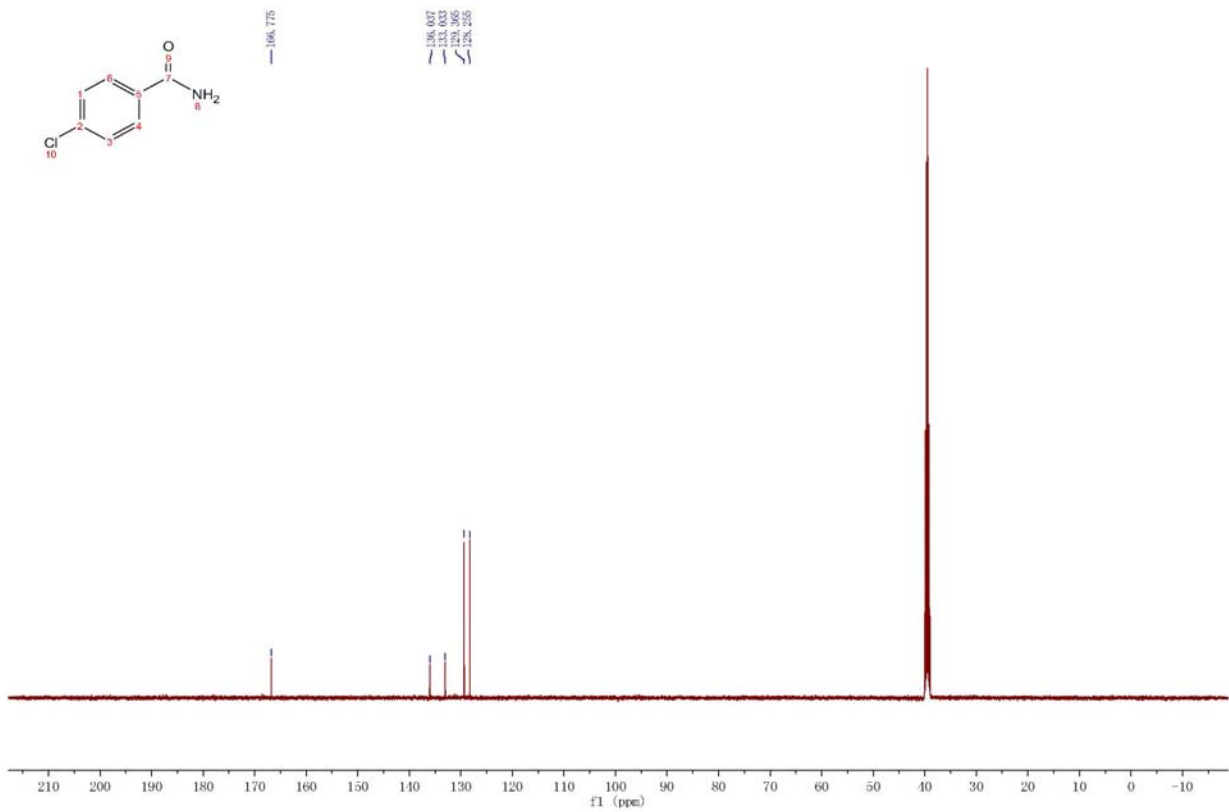







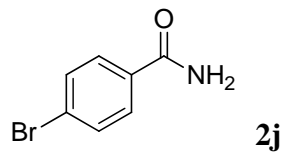

**<sup>1</sup>H NMR**

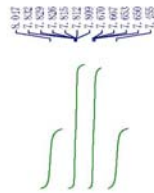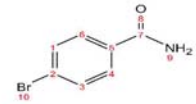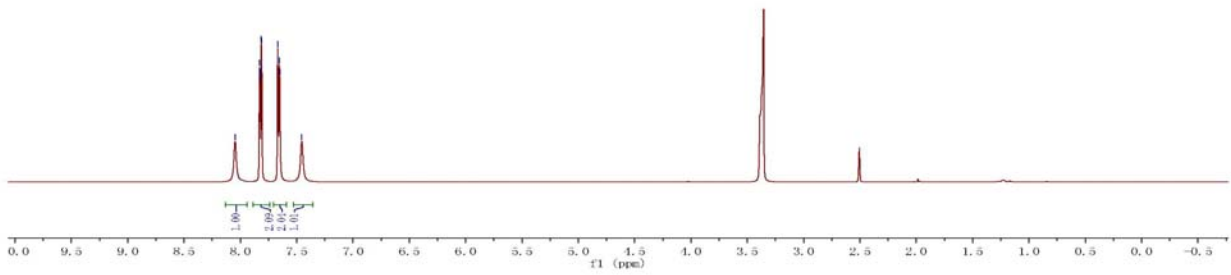

**<sup>13</sup>C NMR**

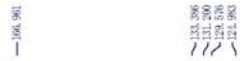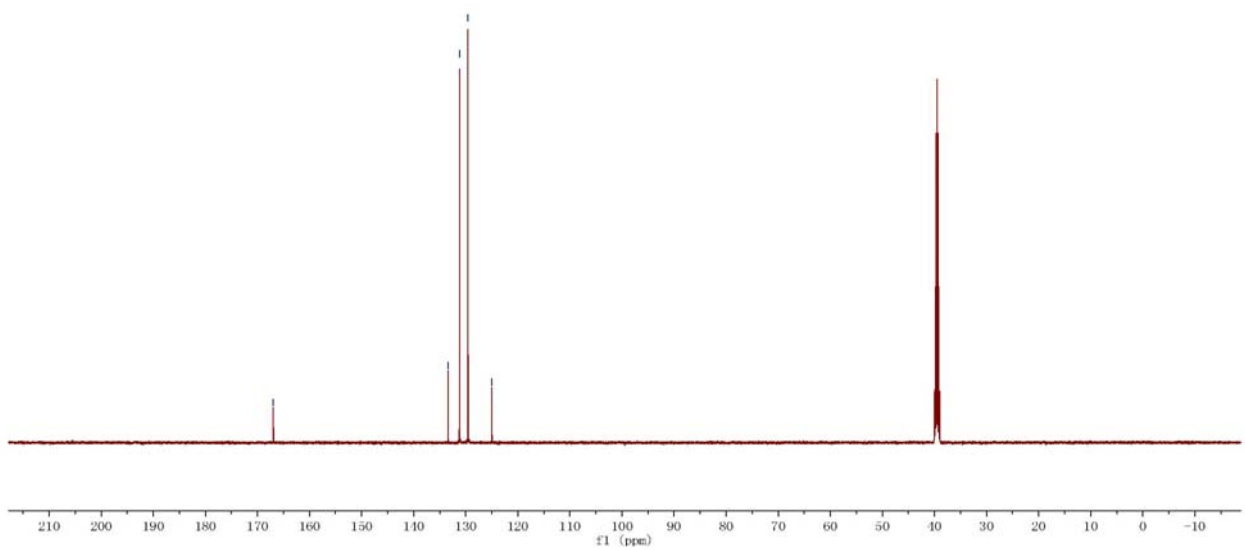

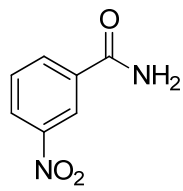

2k

<sup>1</sup>H NMR

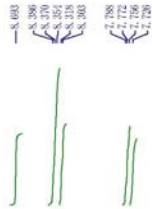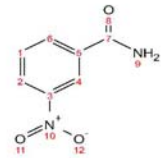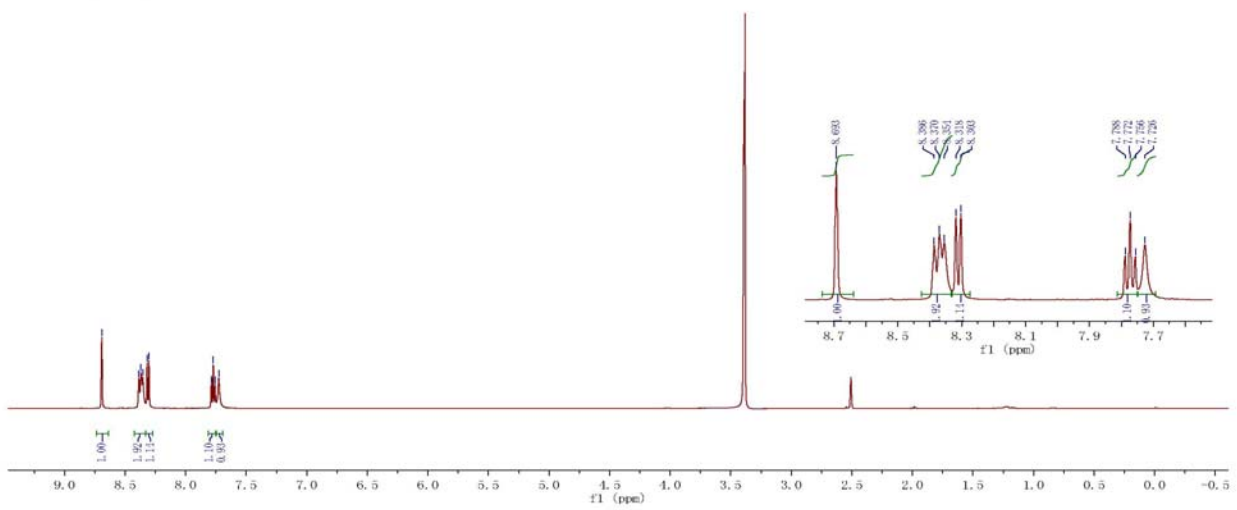

<sup>13</sup>C NMR

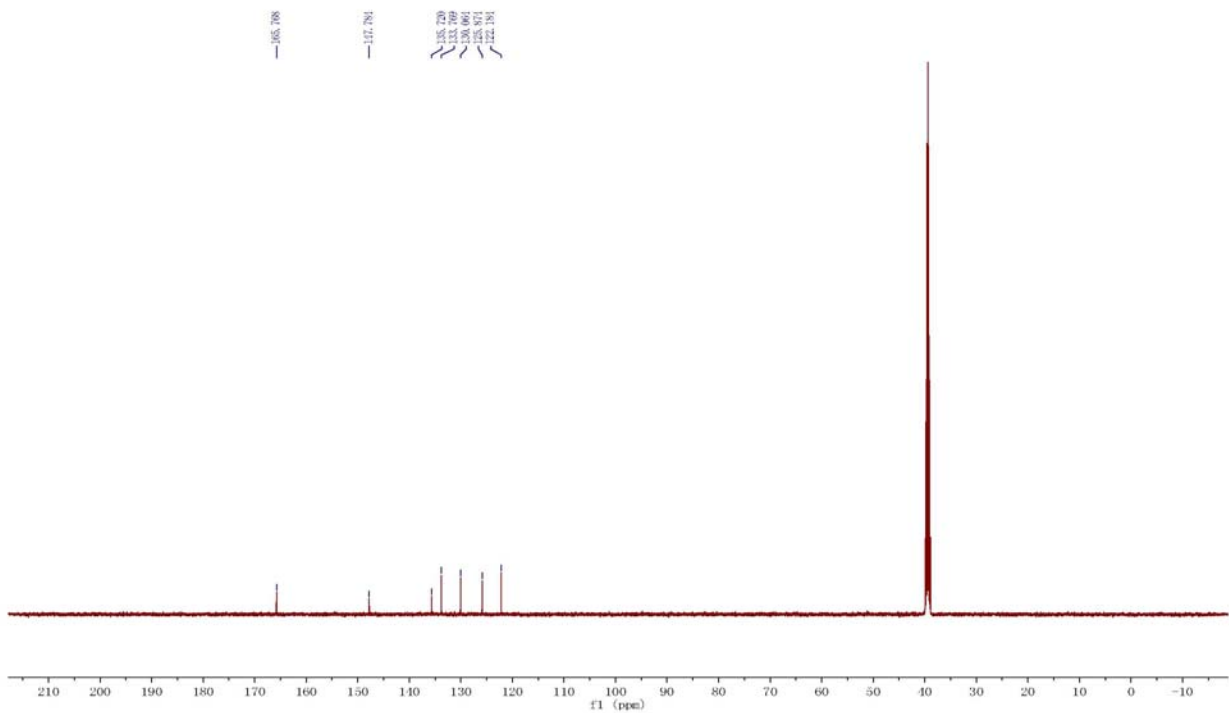



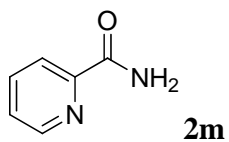

**<sup>1</sup>H NMR**

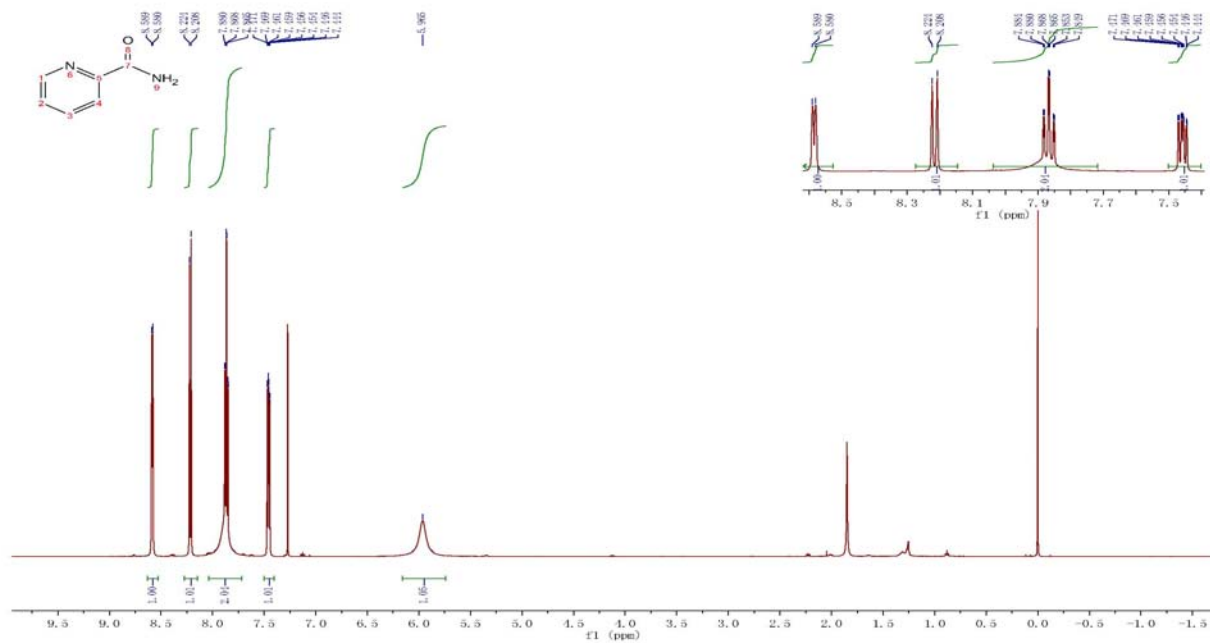

**<sup>13</sup>C NMR**

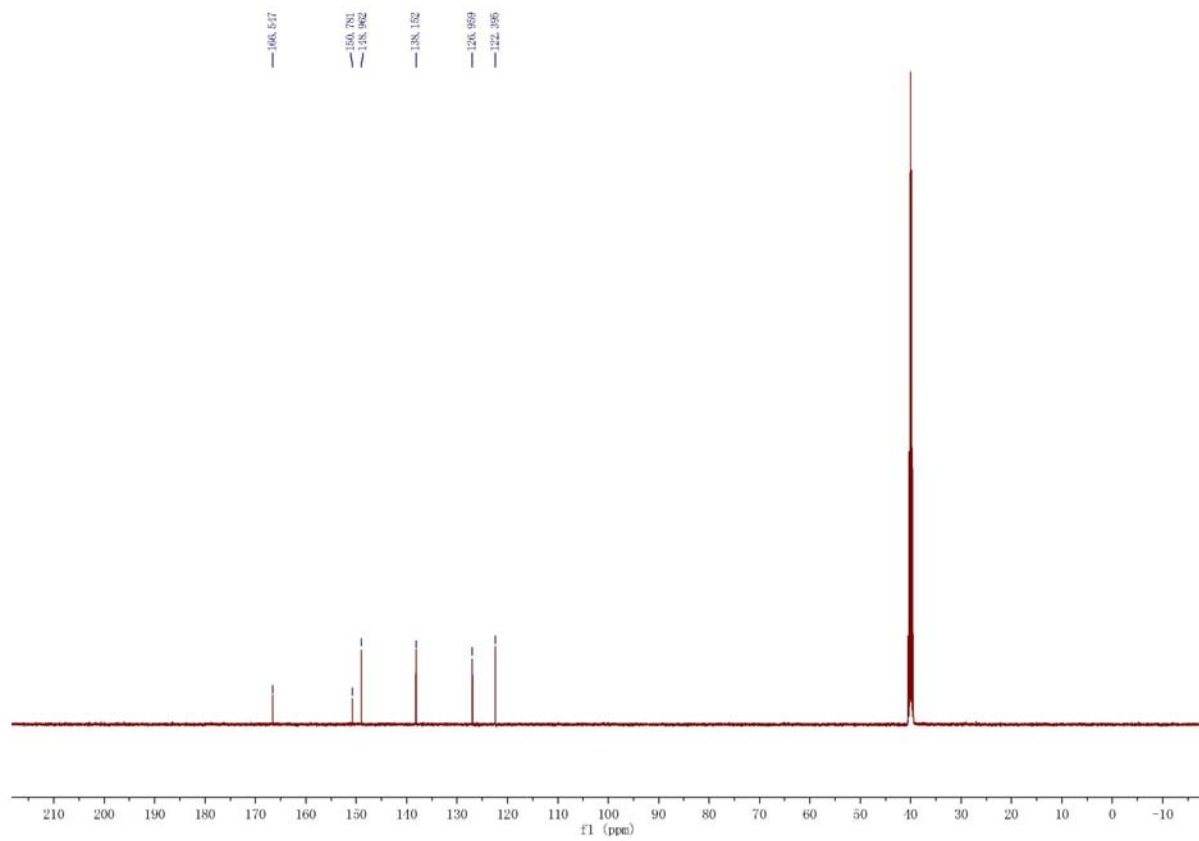

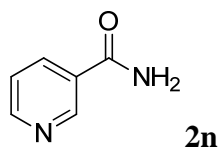

**<sup>1</sup>H NMR**

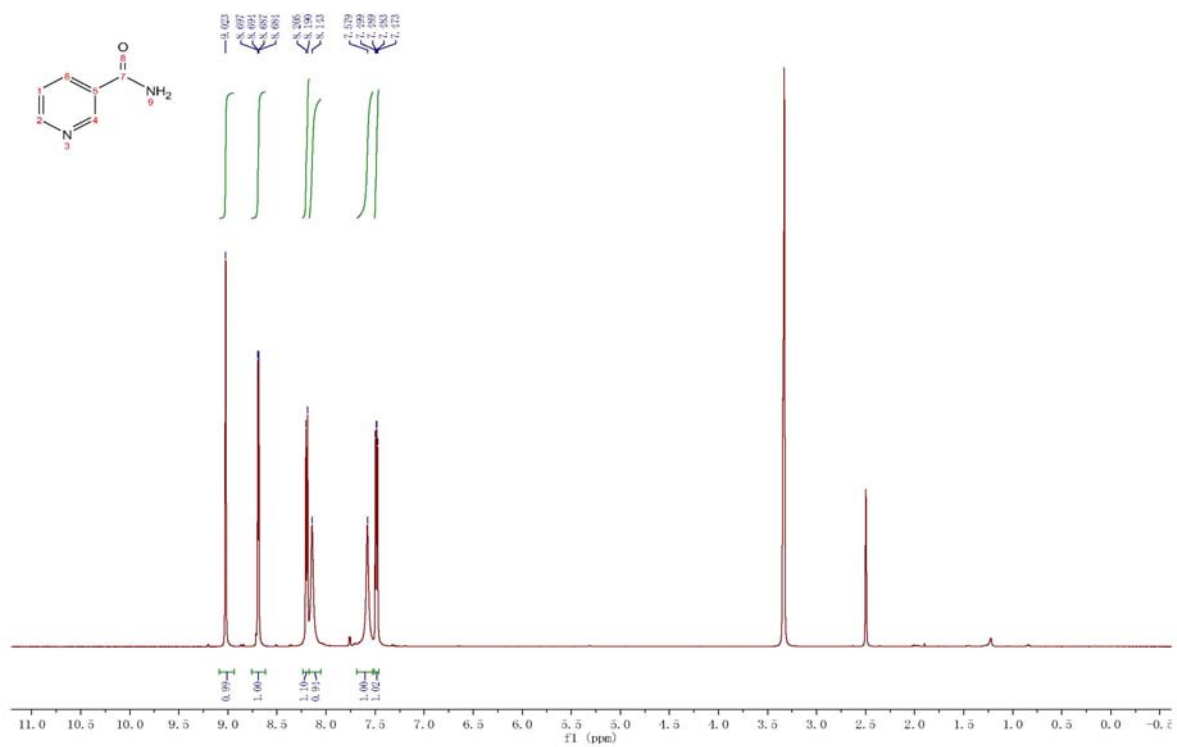

**<sup>13</sup>C NMR**

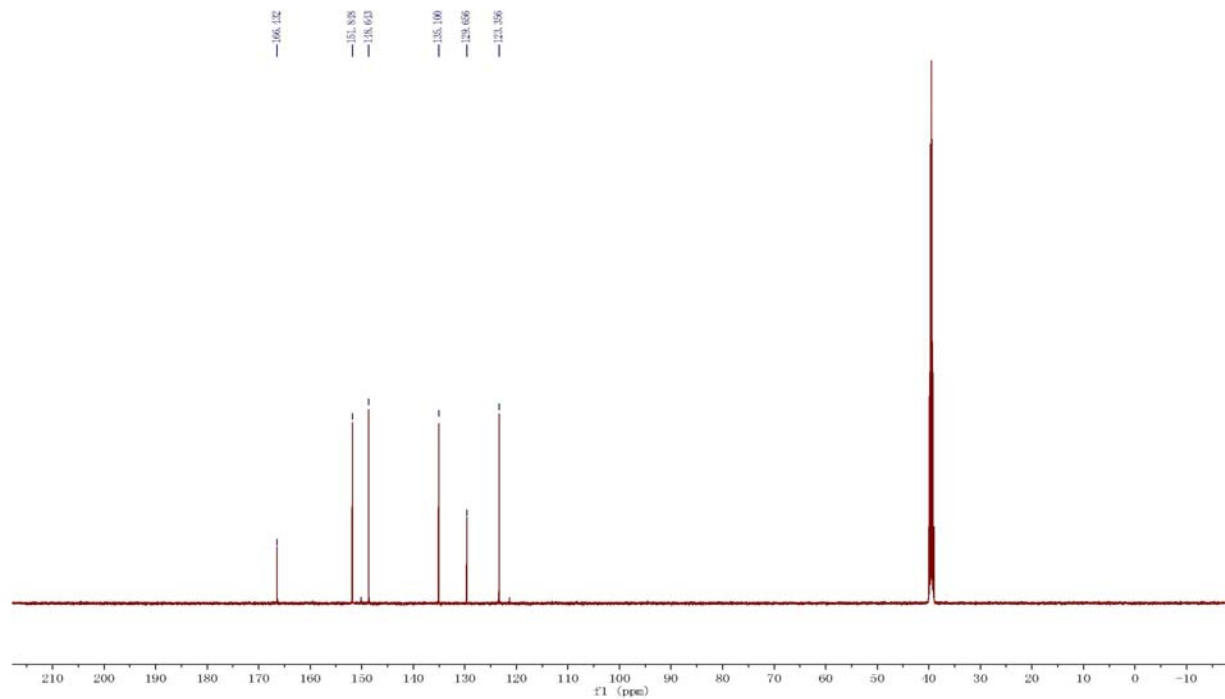

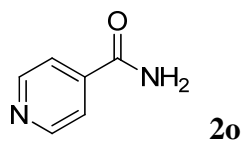

**<sup>1</sup>H NMR**

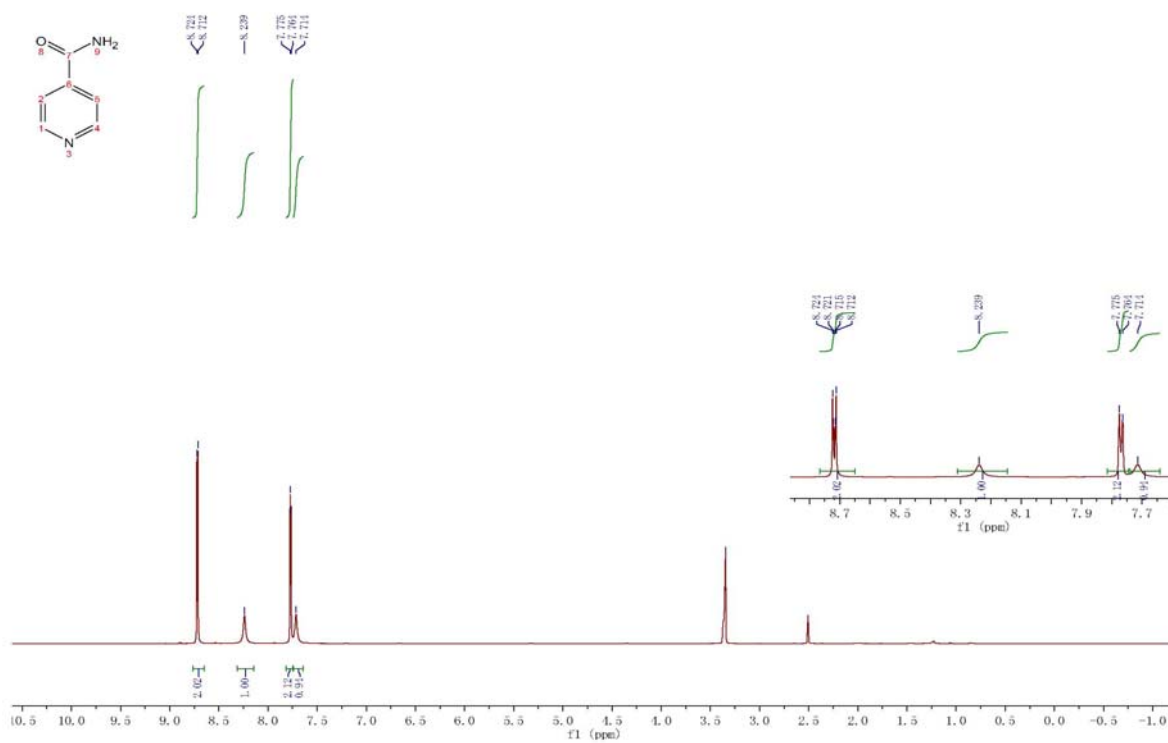

**<sup>13</sup>C NMR**

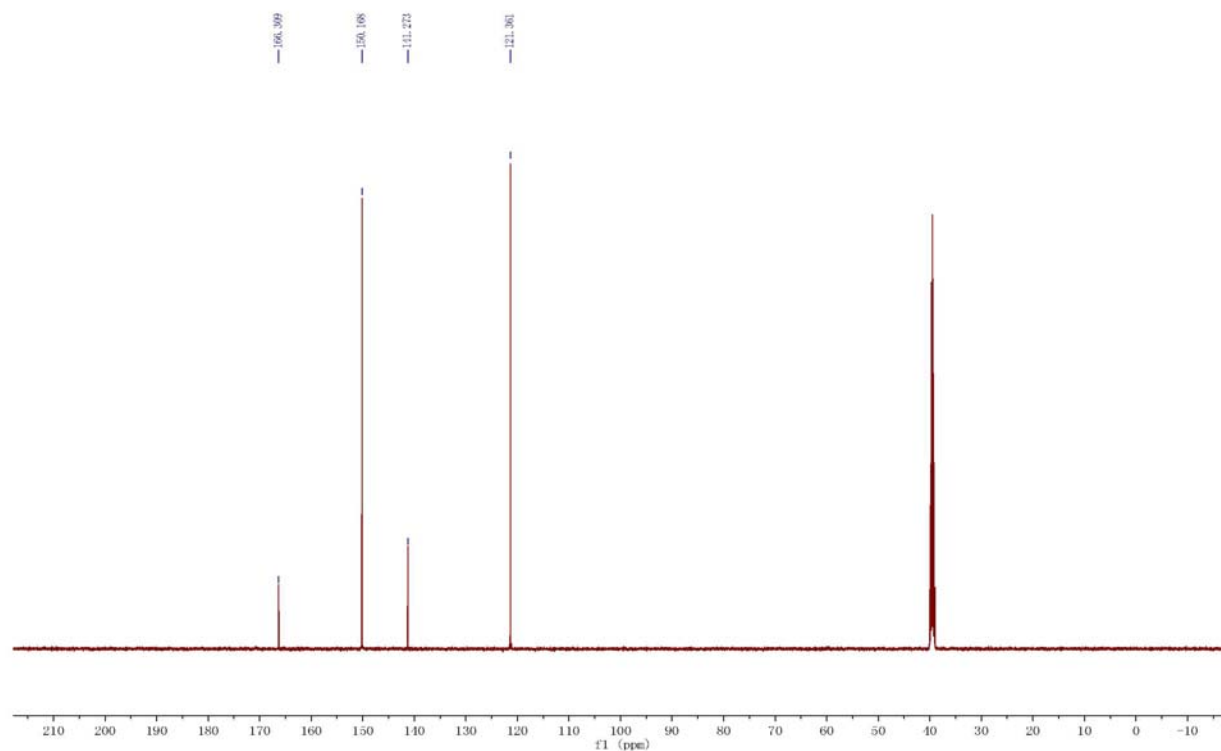



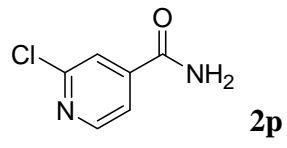

**<sup>1</sup>H NMR**

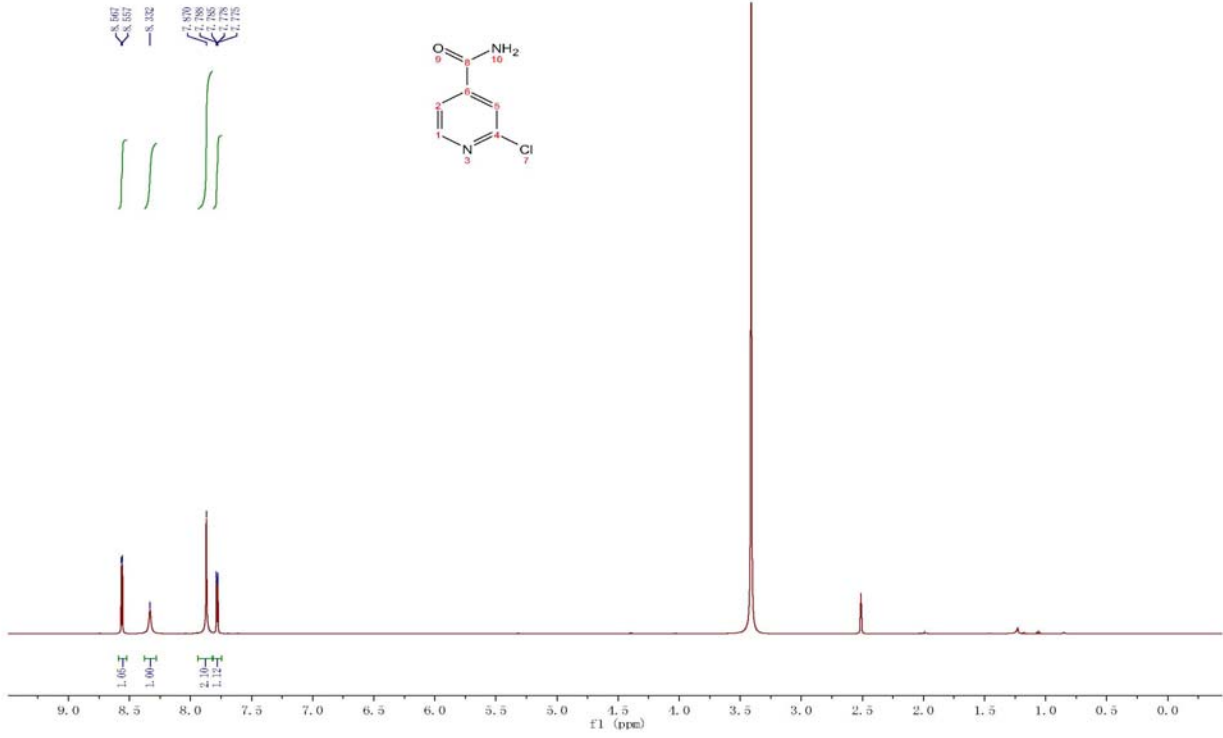

**<sup>13</sup>C NMR**

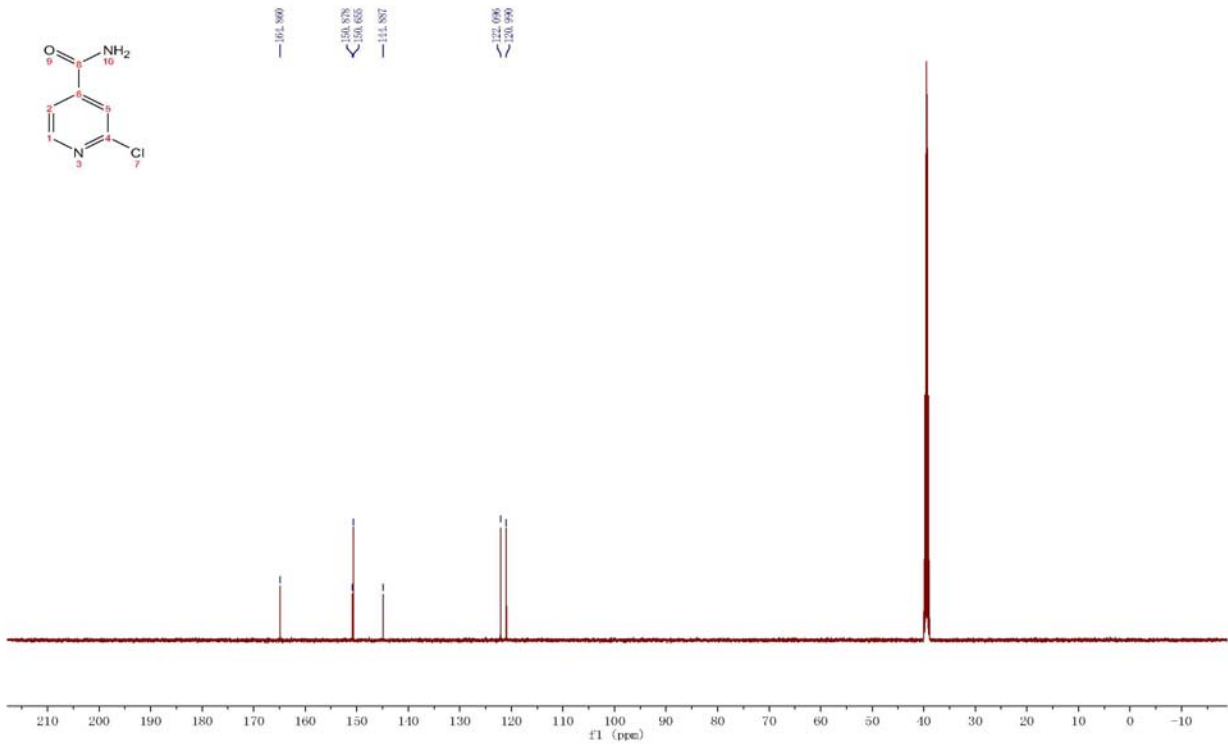

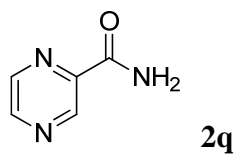

**<sup>1</sup>H NMR**

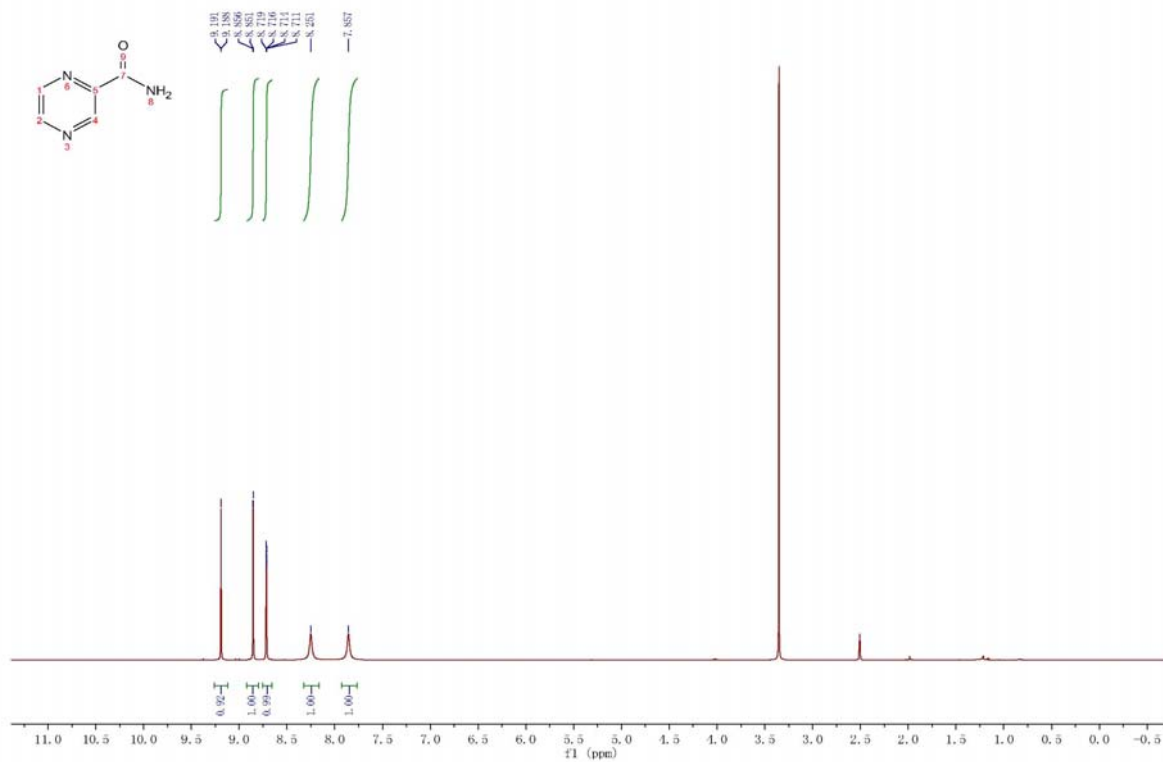

**<sup>13</sup>C NMR**

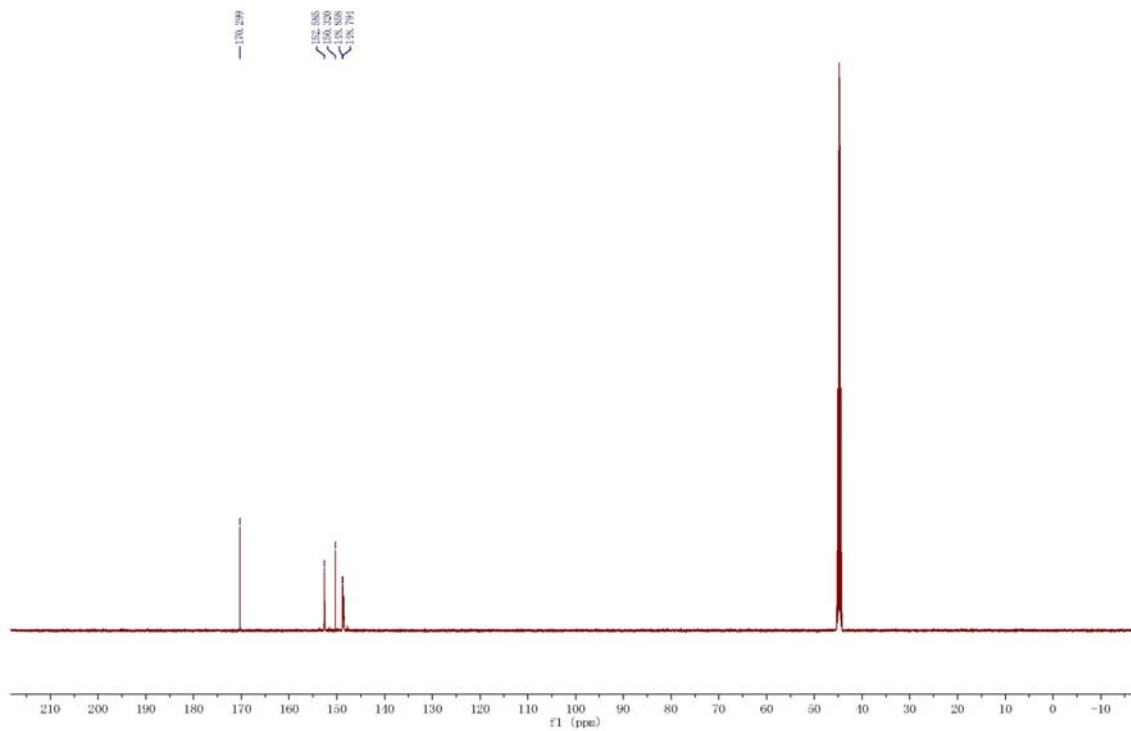

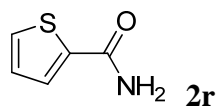

<sup>1</sup>H NMR

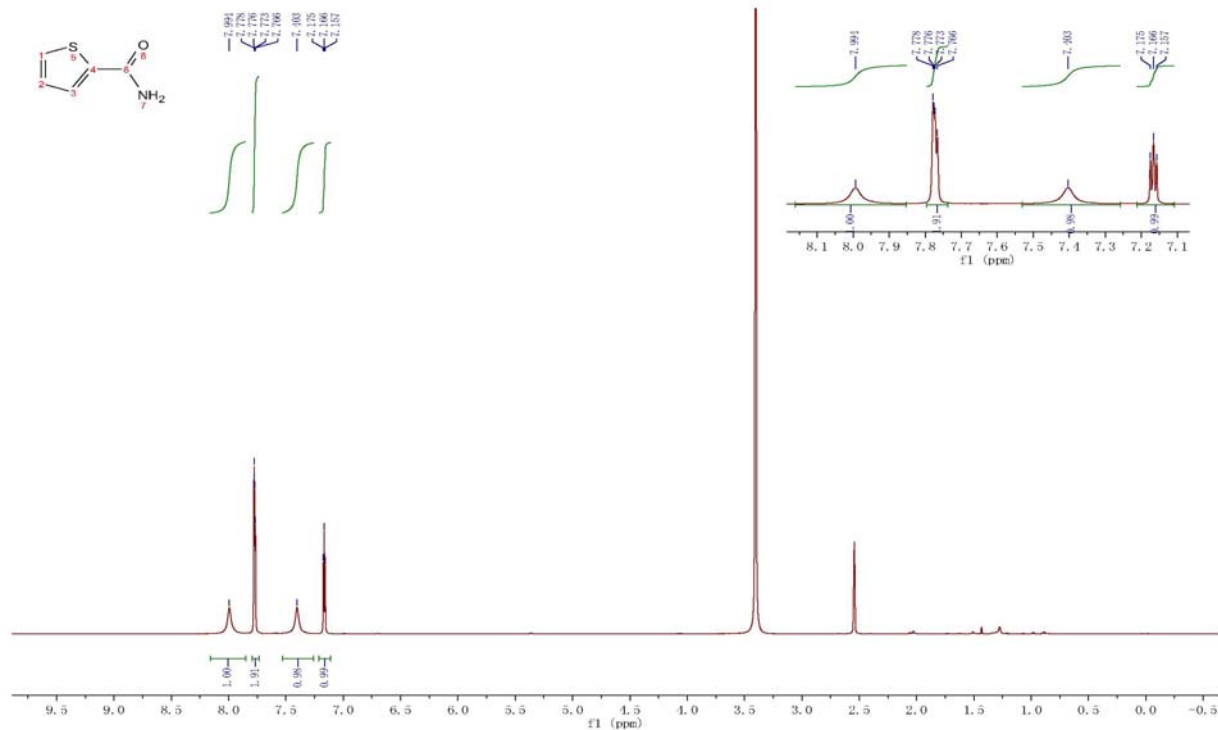

<sup>13</sup>C NMR

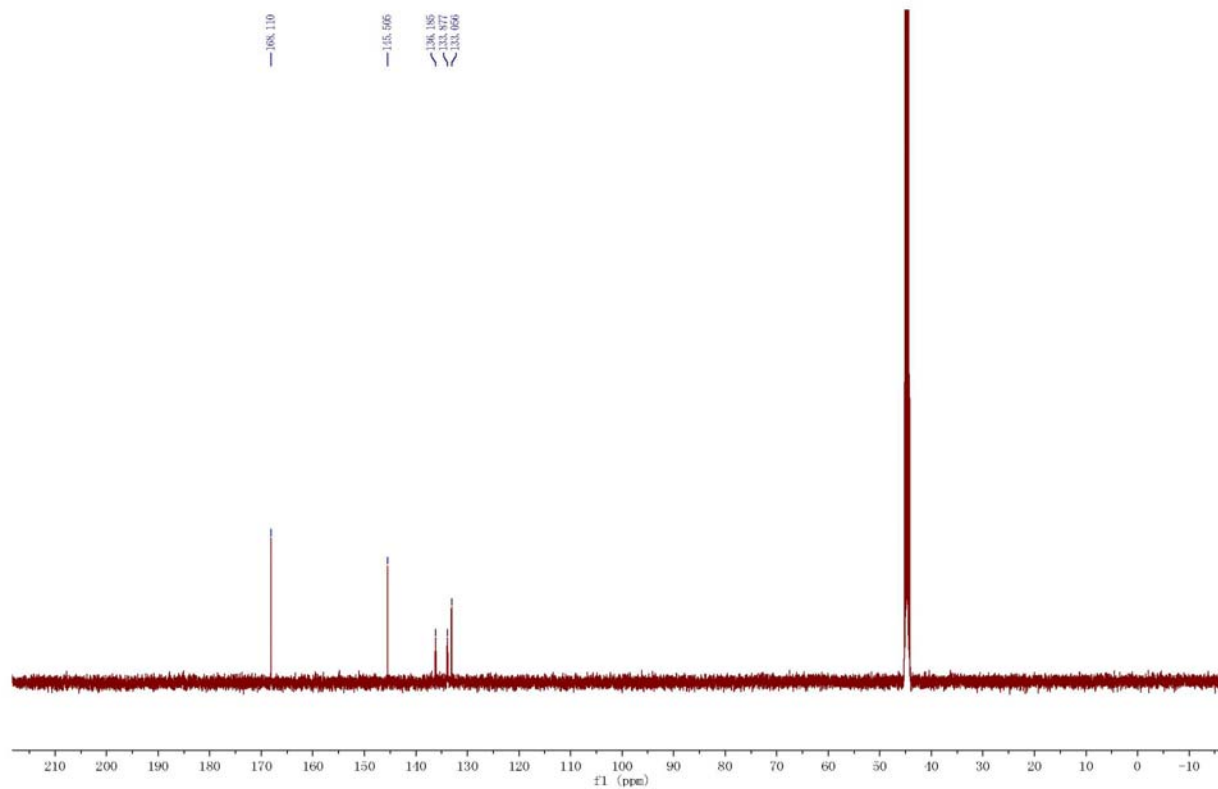

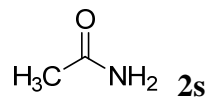

### <sup>1</sup>H NMR

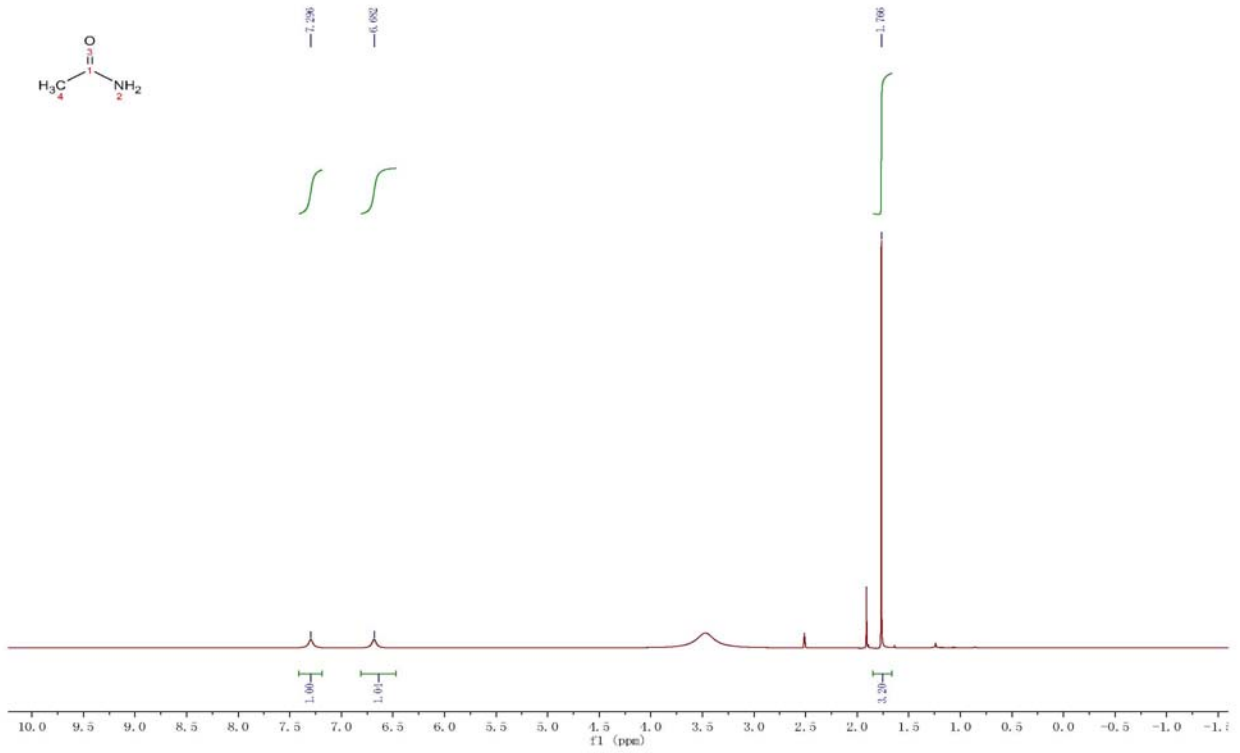

### <sup>13</sup>C NMR

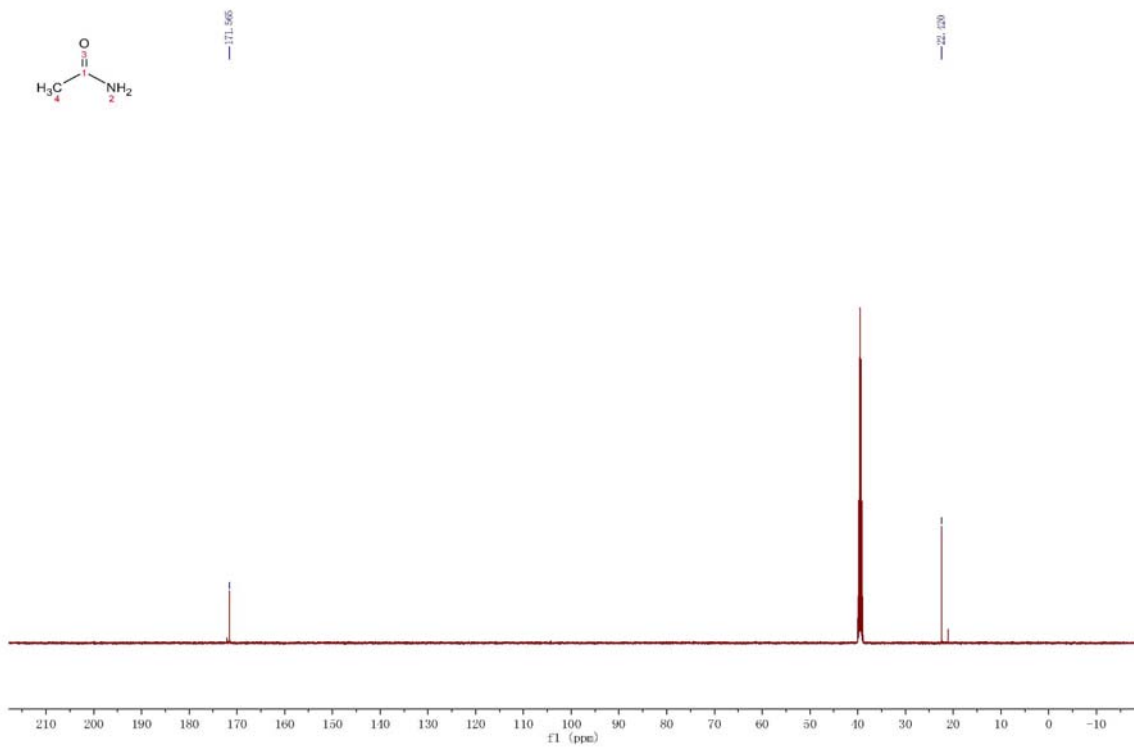

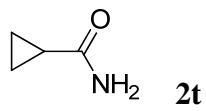

**<sup>1</sup>H NMR**

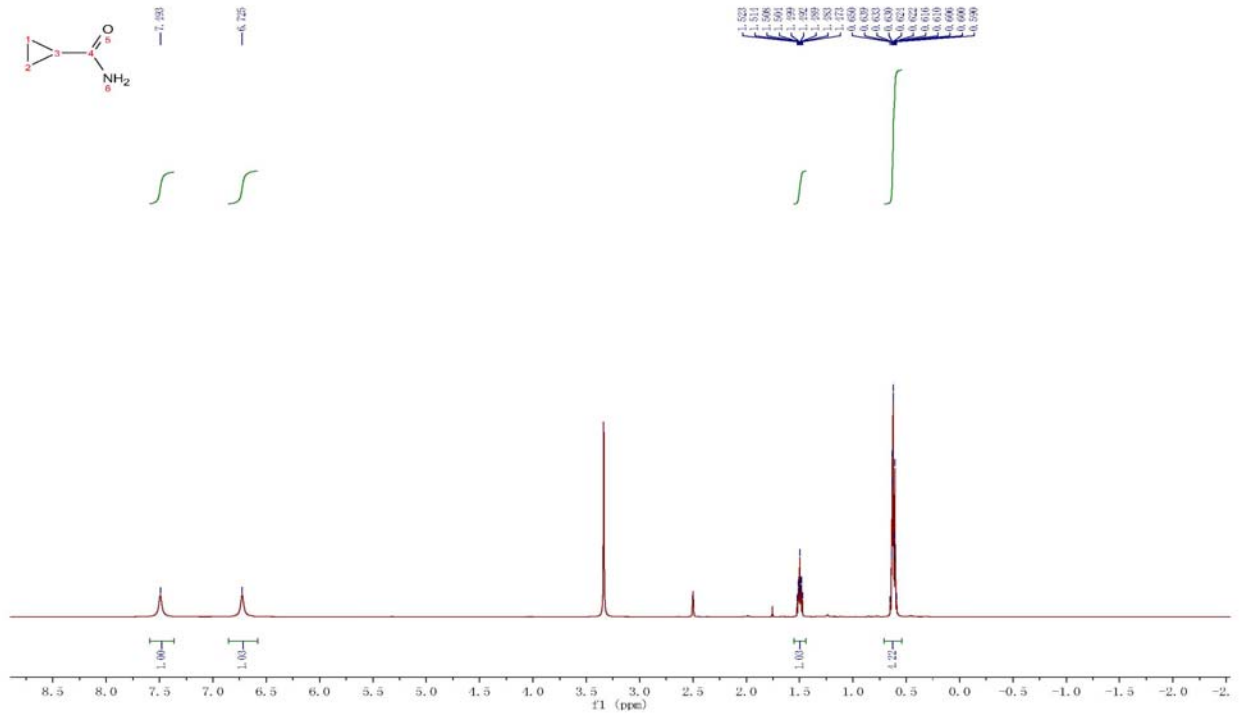

**<sup>13</sup>C NMR**

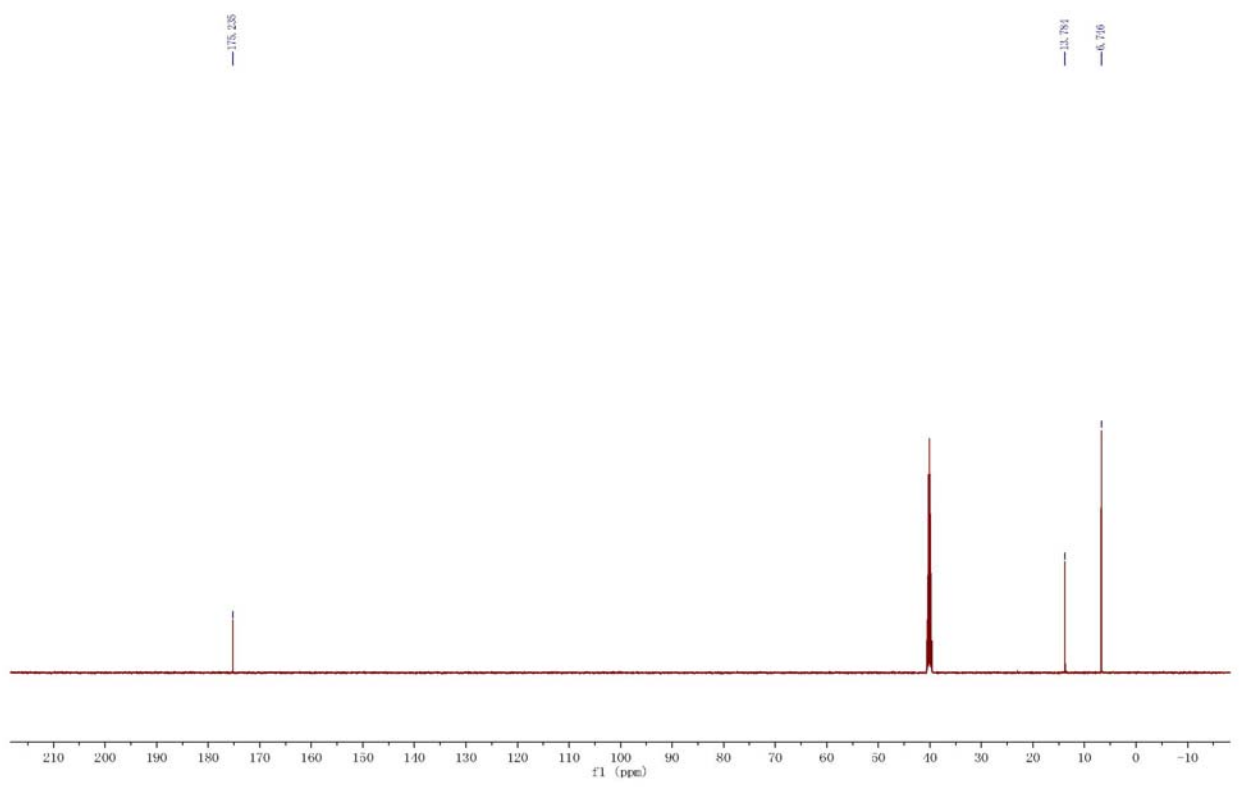

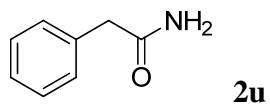

**<sup>1</sup>H NMR**

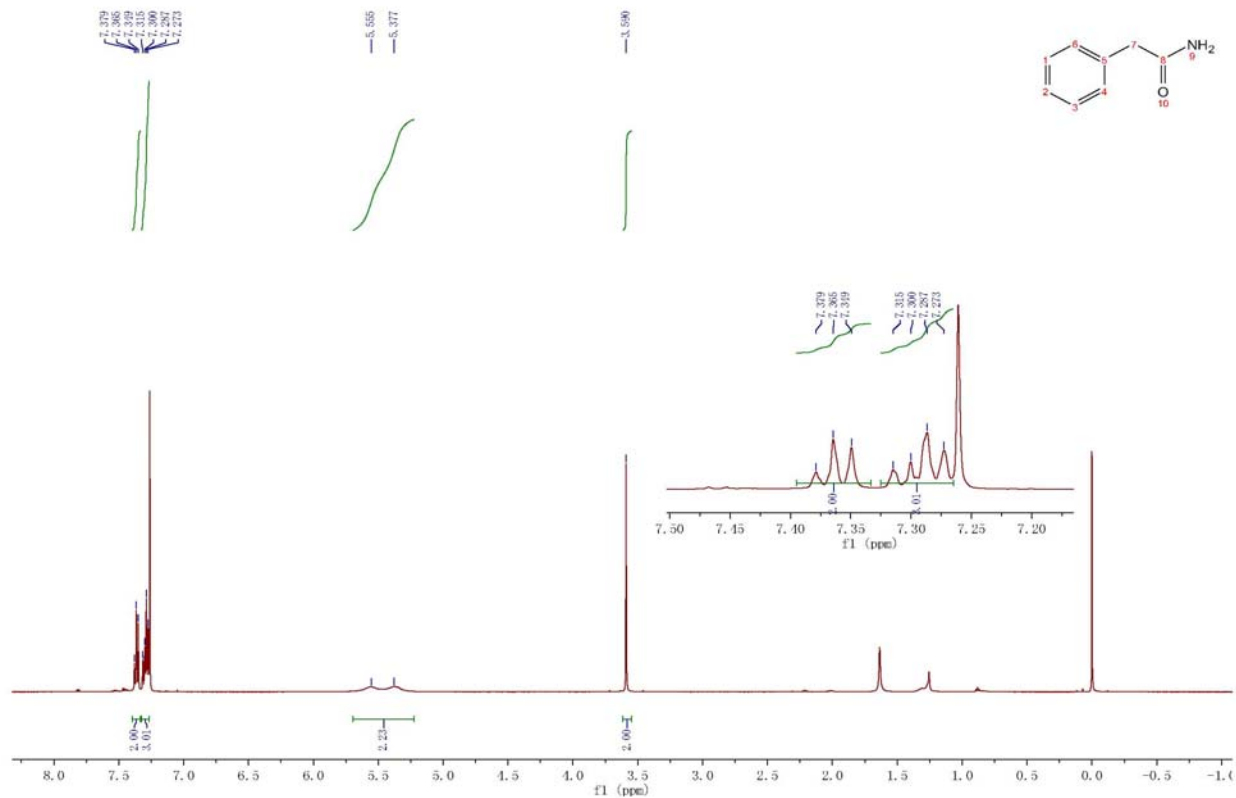

**<sup>13</sup>C NMR**

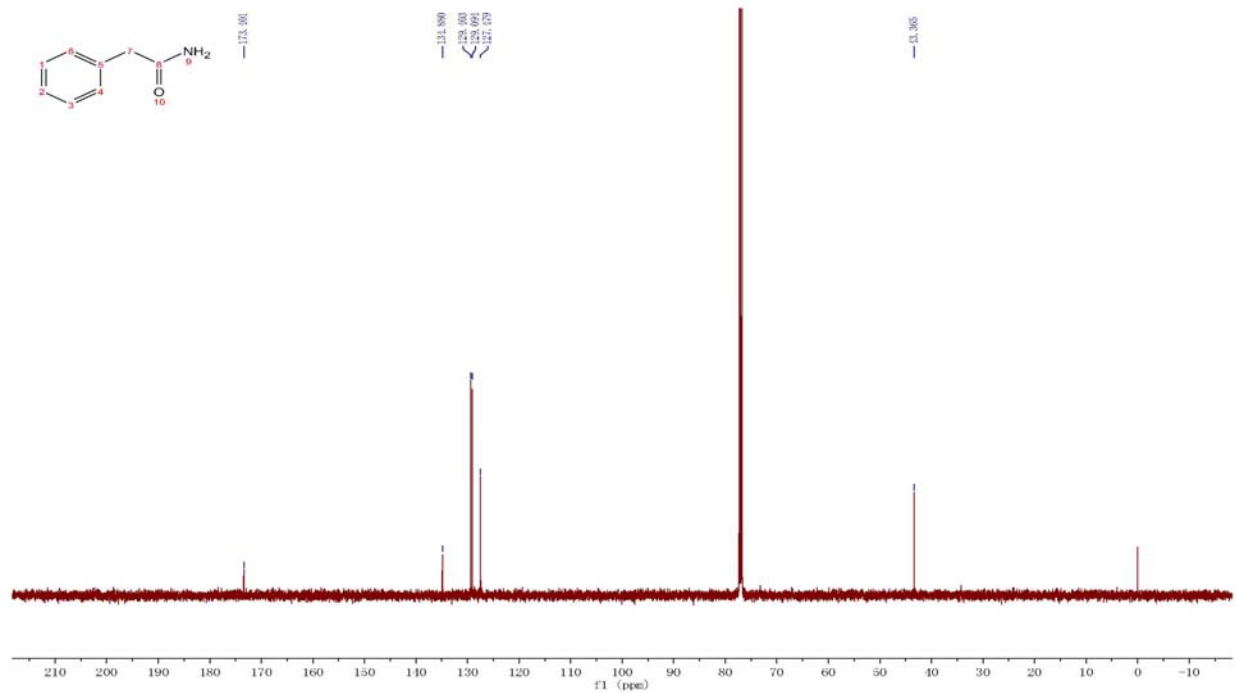

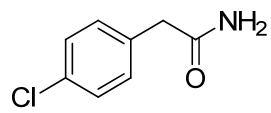

2v

<sup>1</sup>H NMR

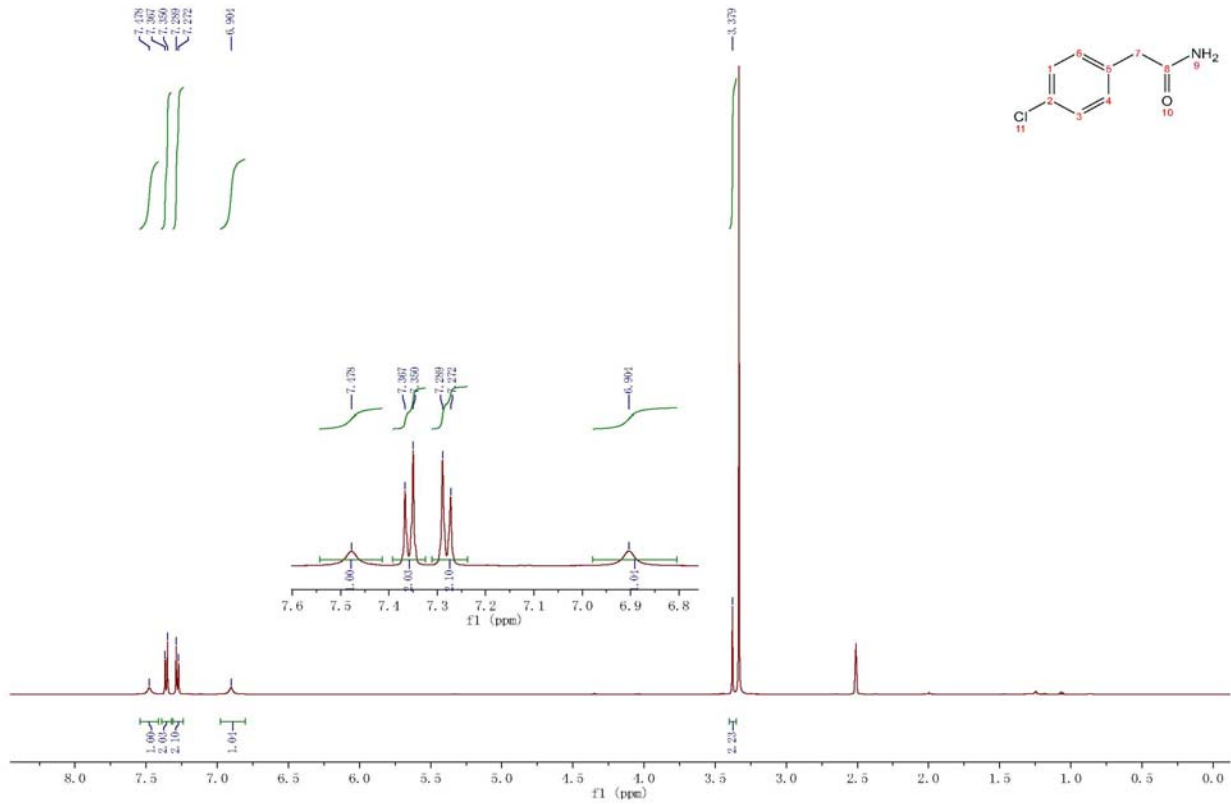

<sup>13</sup>C NMR

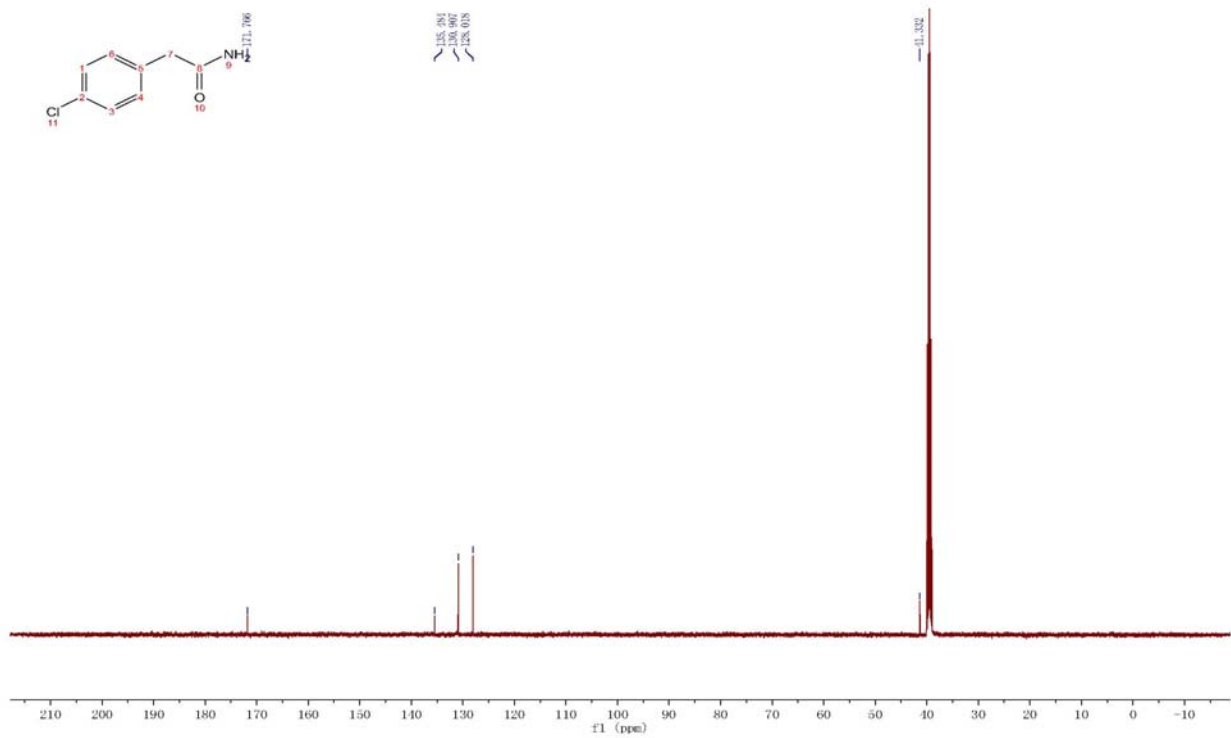

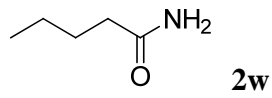

**<sup>1</sup>H NMR**

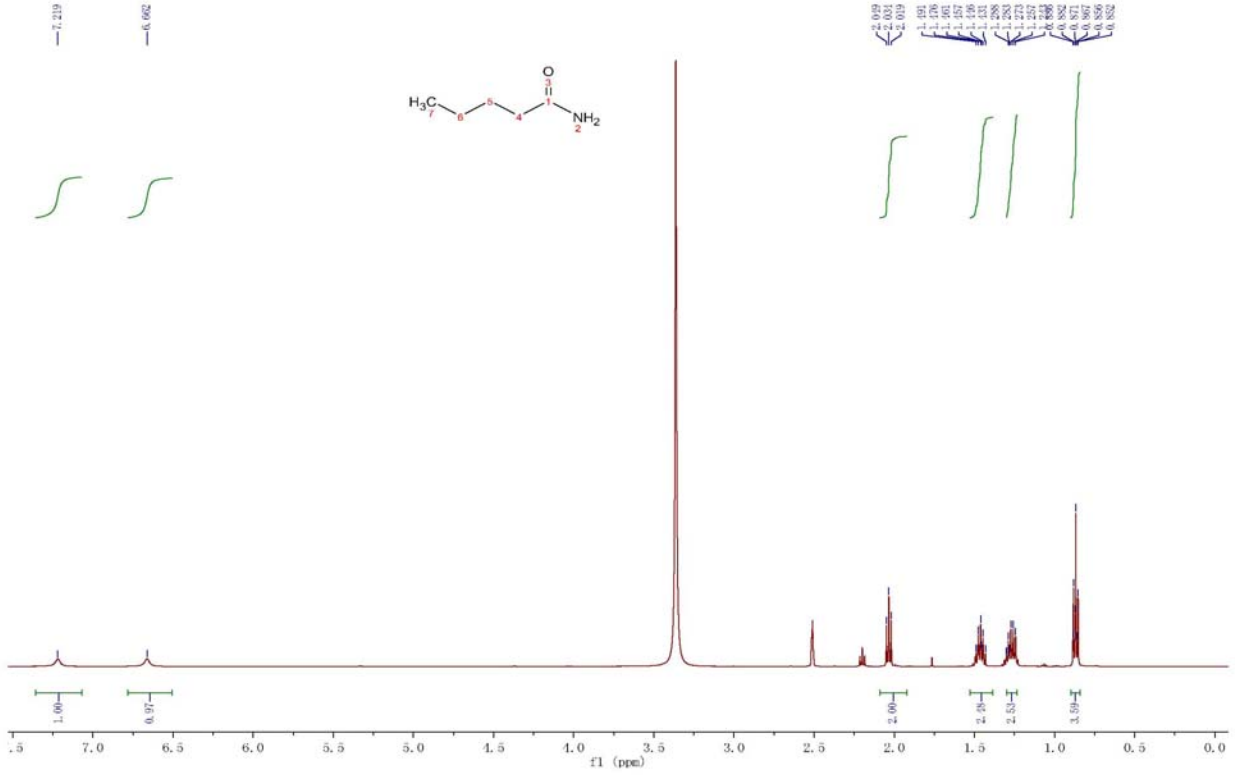

**<sup>13</sup>C NMR**

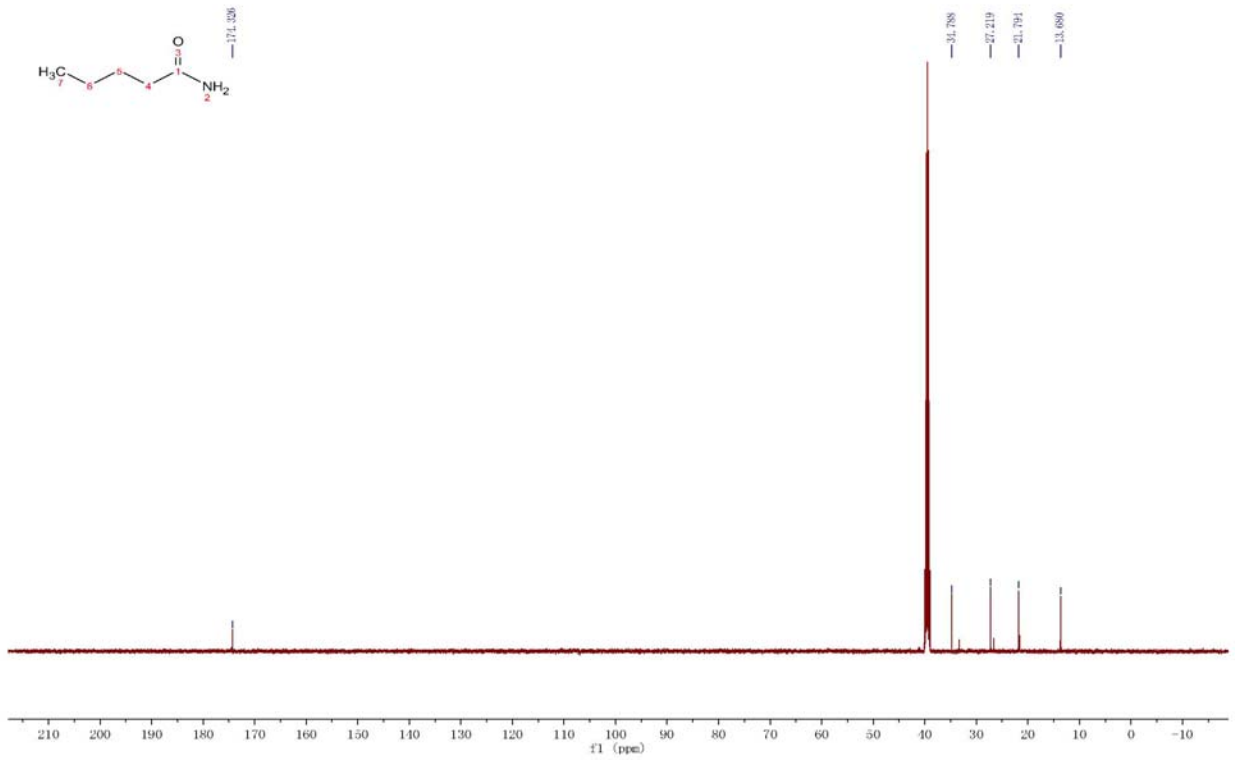



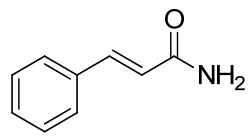

2x

### <sup>1</sup>H NMR

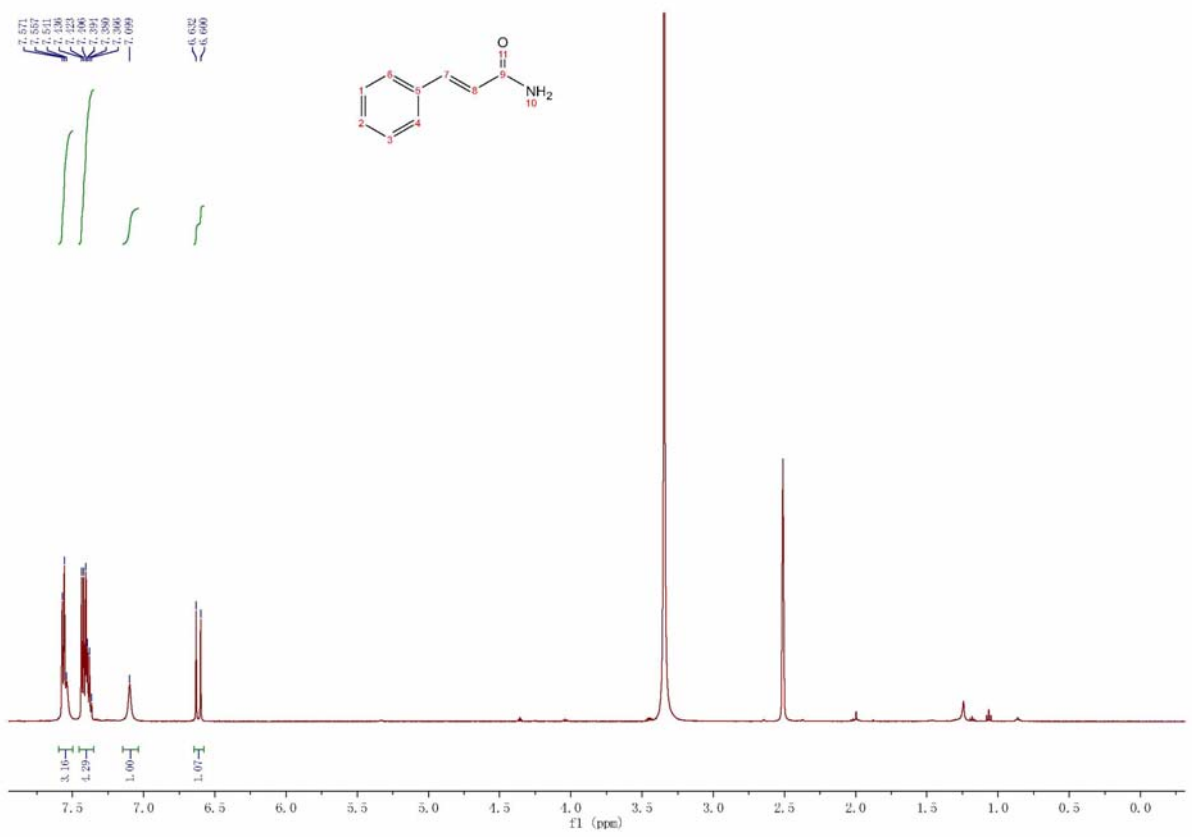

### <sup>13</sup>C NMR

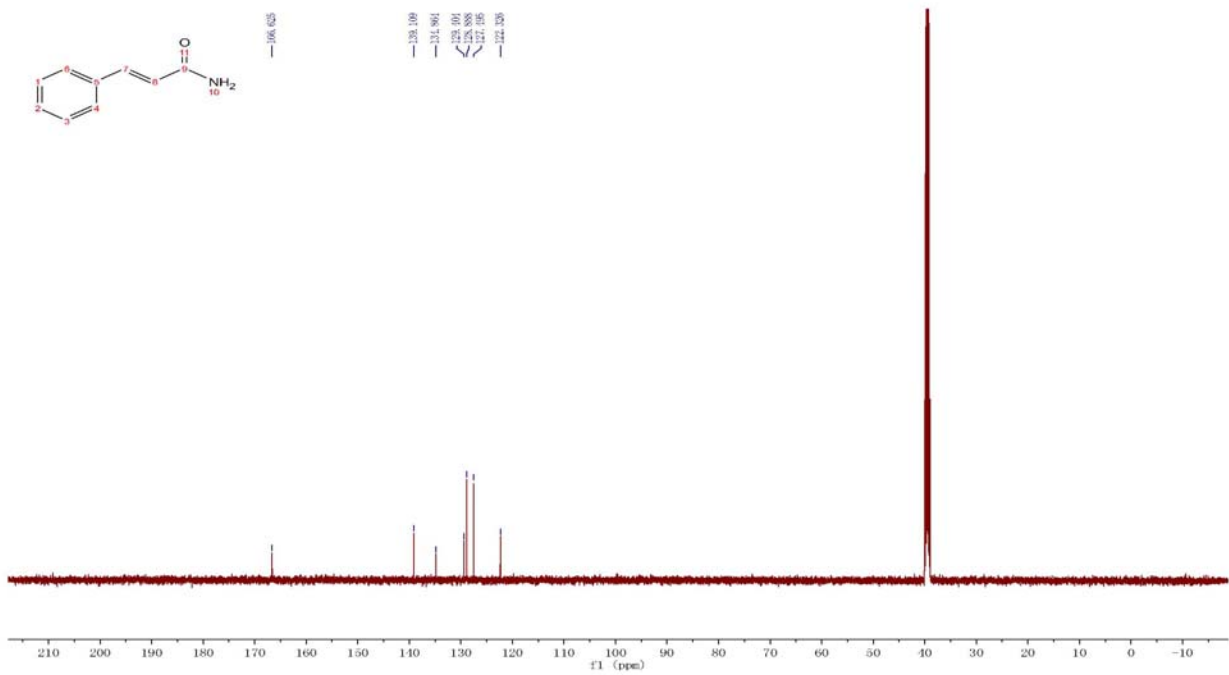



# <sup>1</sup>H NMR

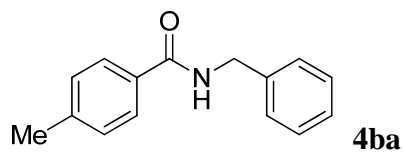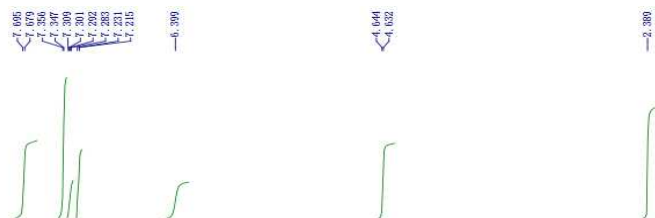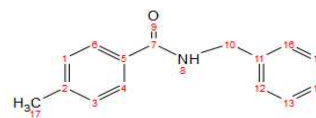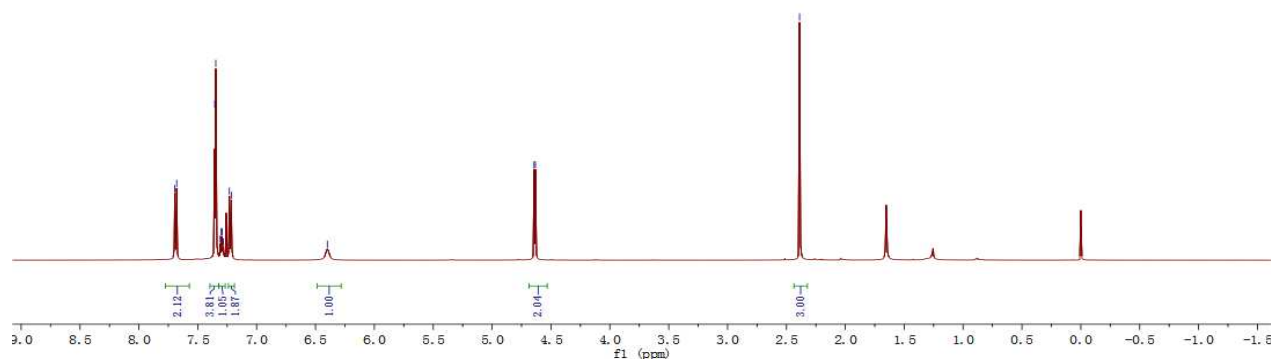

# <sup>13</sup>C NMR

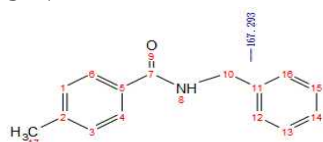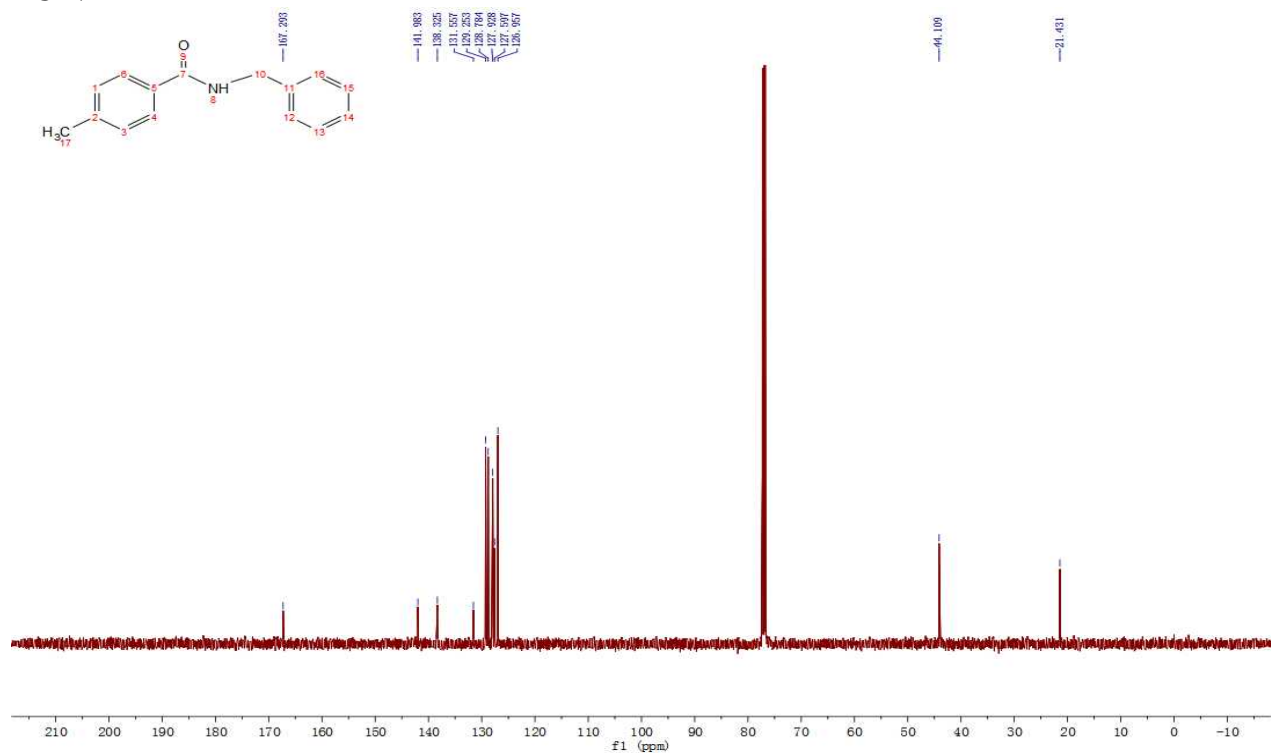

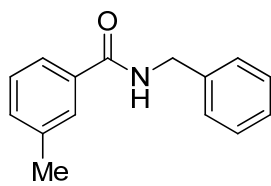

<sup>1</sup>H NMR

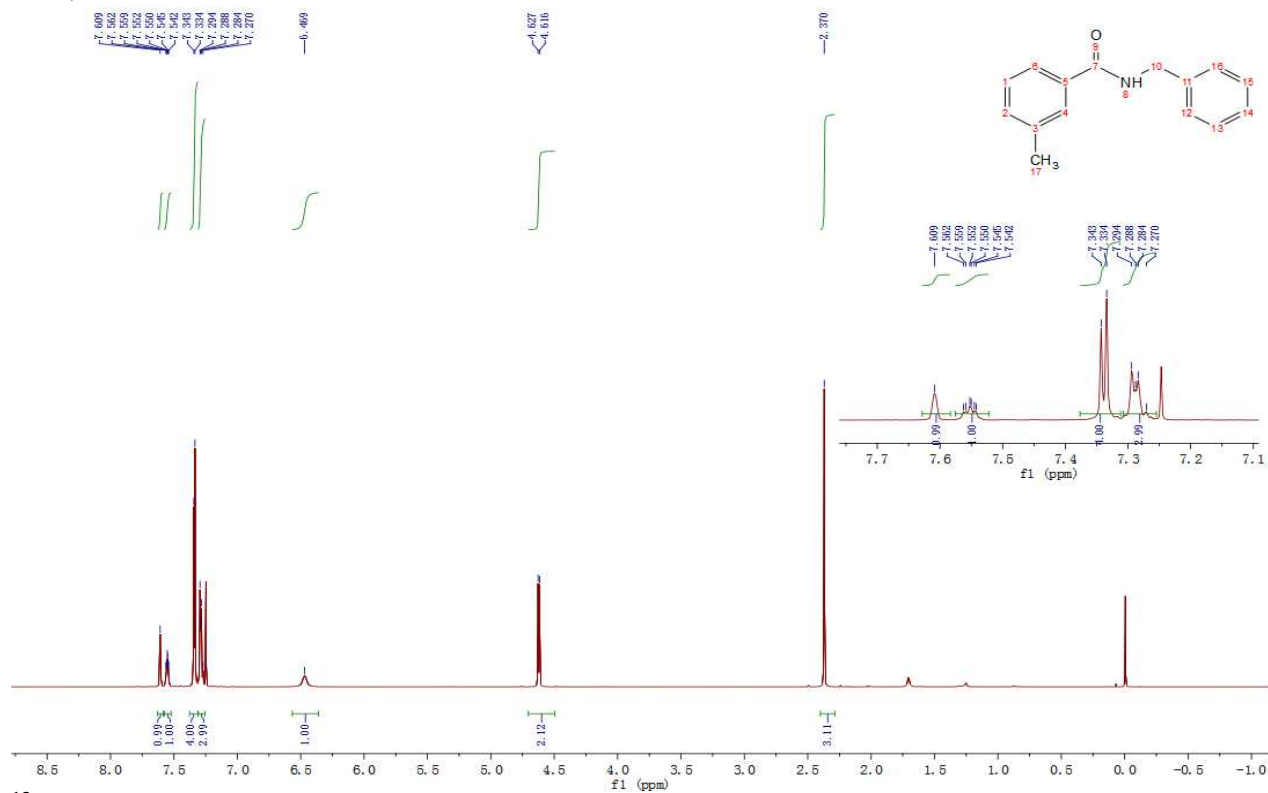

<sup>13</sup>C NMR

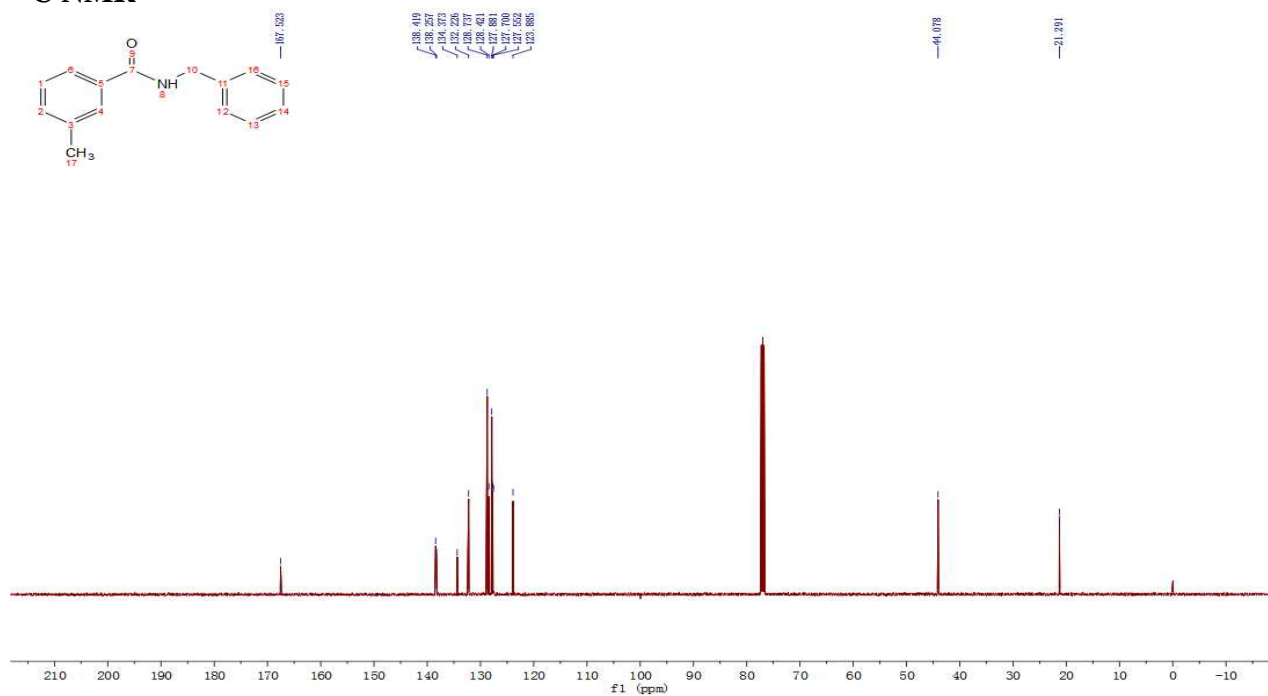

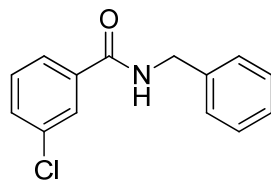

4ha

<sup>1</sup>H NMR

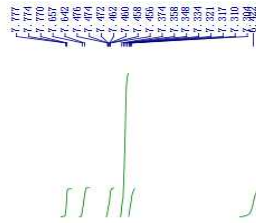

4.523  
4.523

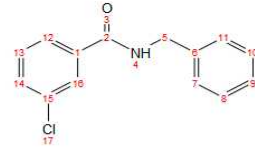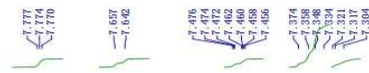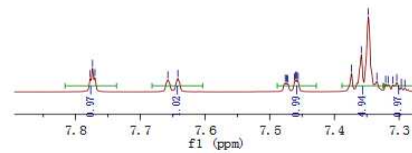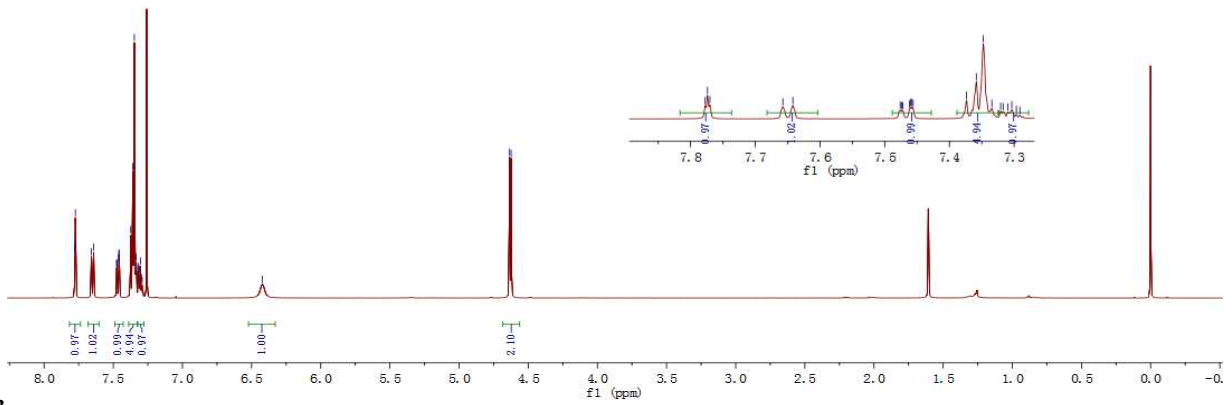

<sup>13</sup>C NMR

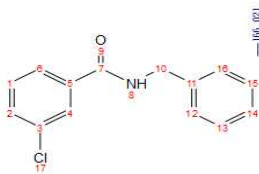

166.021

137.859

136.212

134.828

131.602

128.874

127.976

127.790

127.353

126.051

41.304

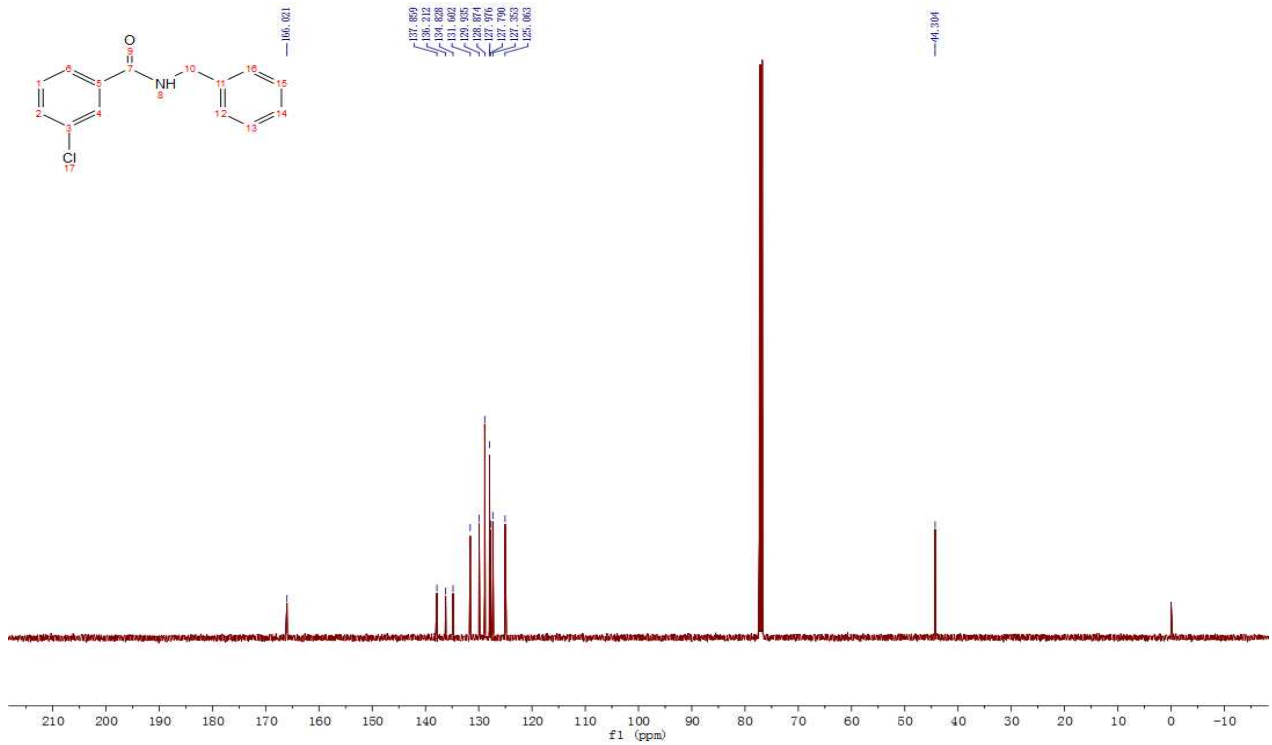

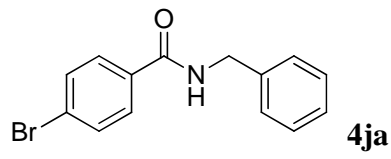

**<sup>1</sup>H NMR**

7.663  
7.646  
7.569  
7.552  
7.376  
7.365  
7.360  
7.347  
7.337  
7.335  
7.330  
7.320  
7.316  
7.303  
7.296  
7.291

6.371

4.635  
4.621

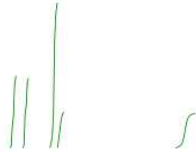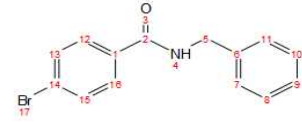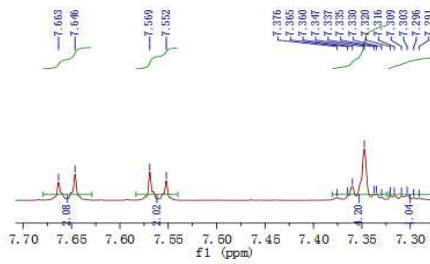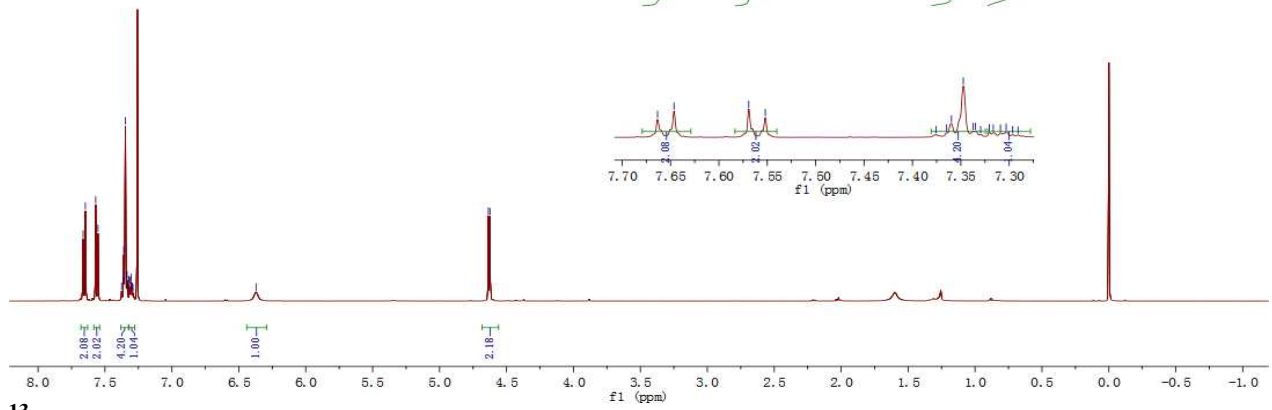

**<sup>13</sup>C NMR**

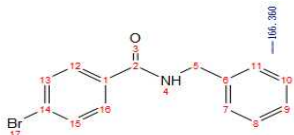

137.937  
133.250  
131.860  
128.596  
127.979  
127.783  
126.269

41.289

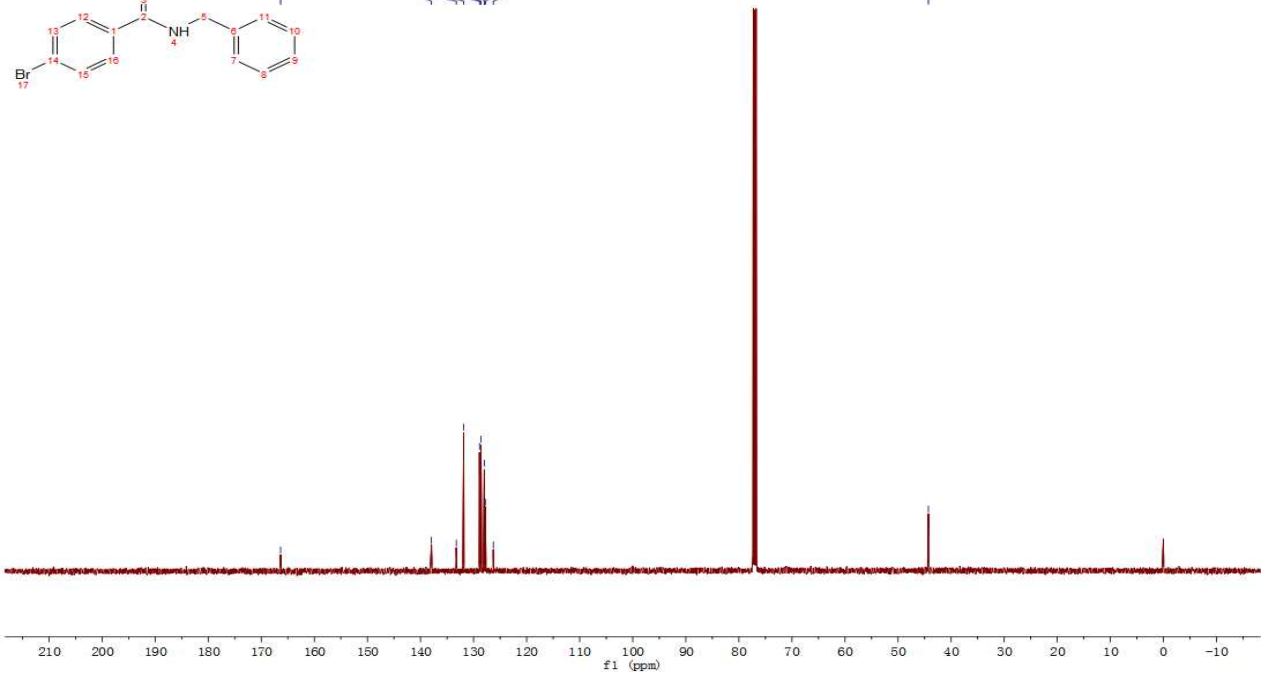

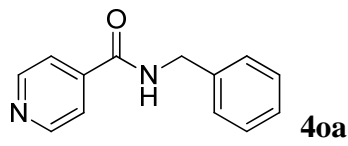

**<sup>1</sup>H NMR**

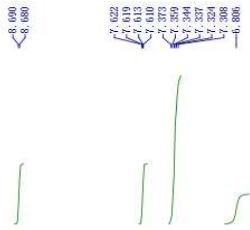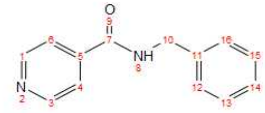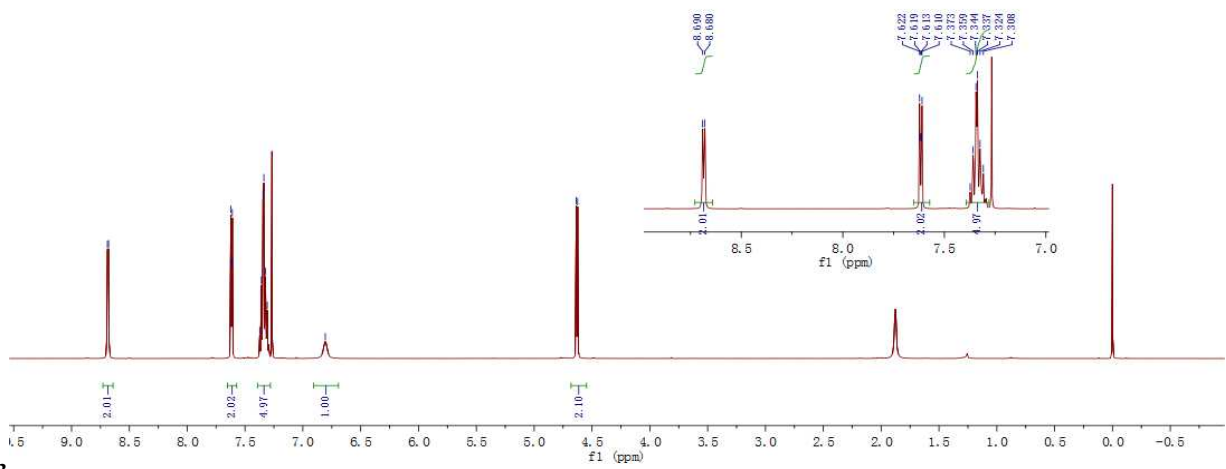

**<sup>13</sup>C NMR**

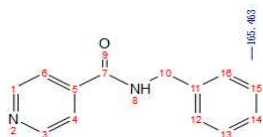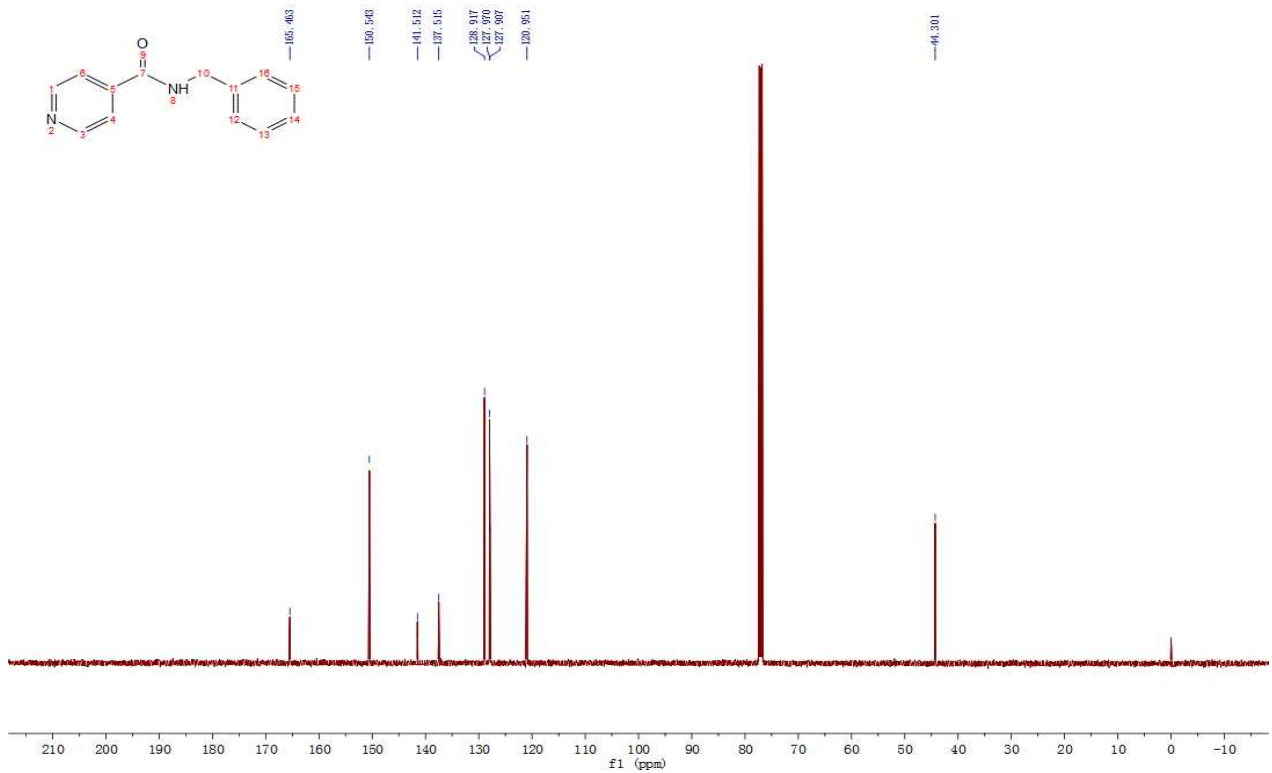

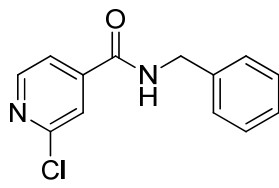

4pa

<sup>1</sup>H NMR

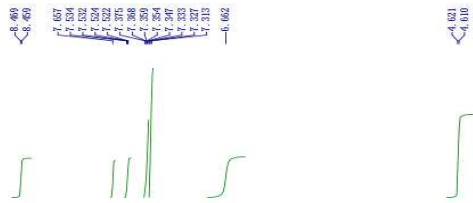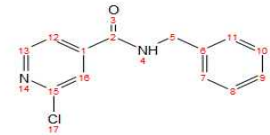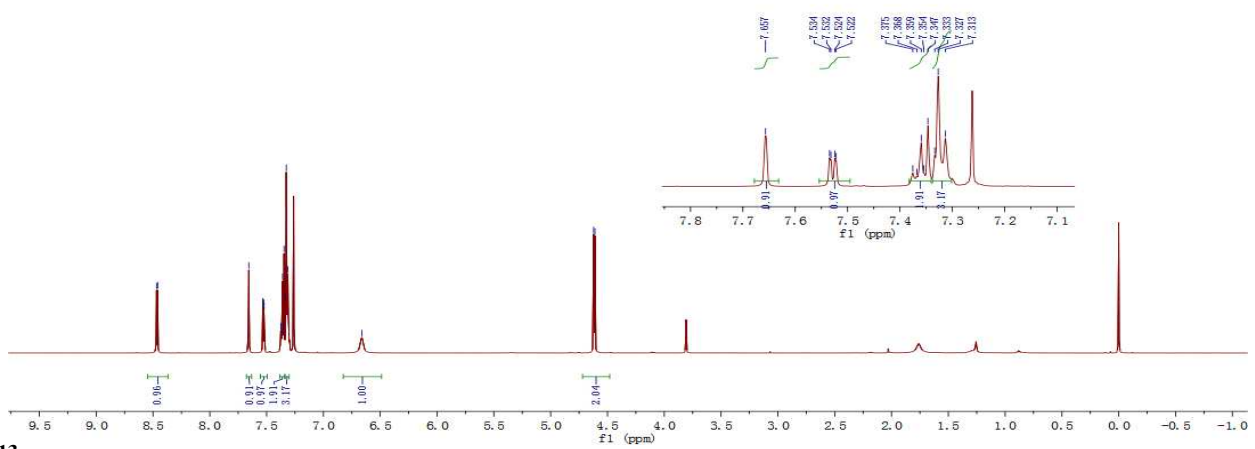

<sup>13</sup>C NMR

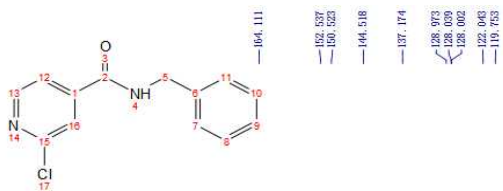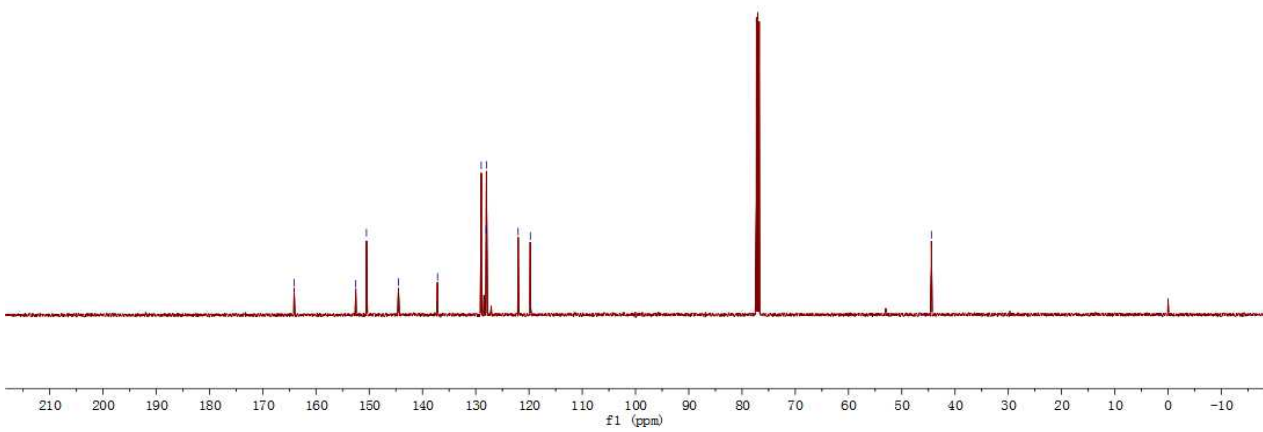



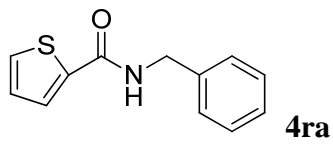

**<sup>1</sup>H NMR**

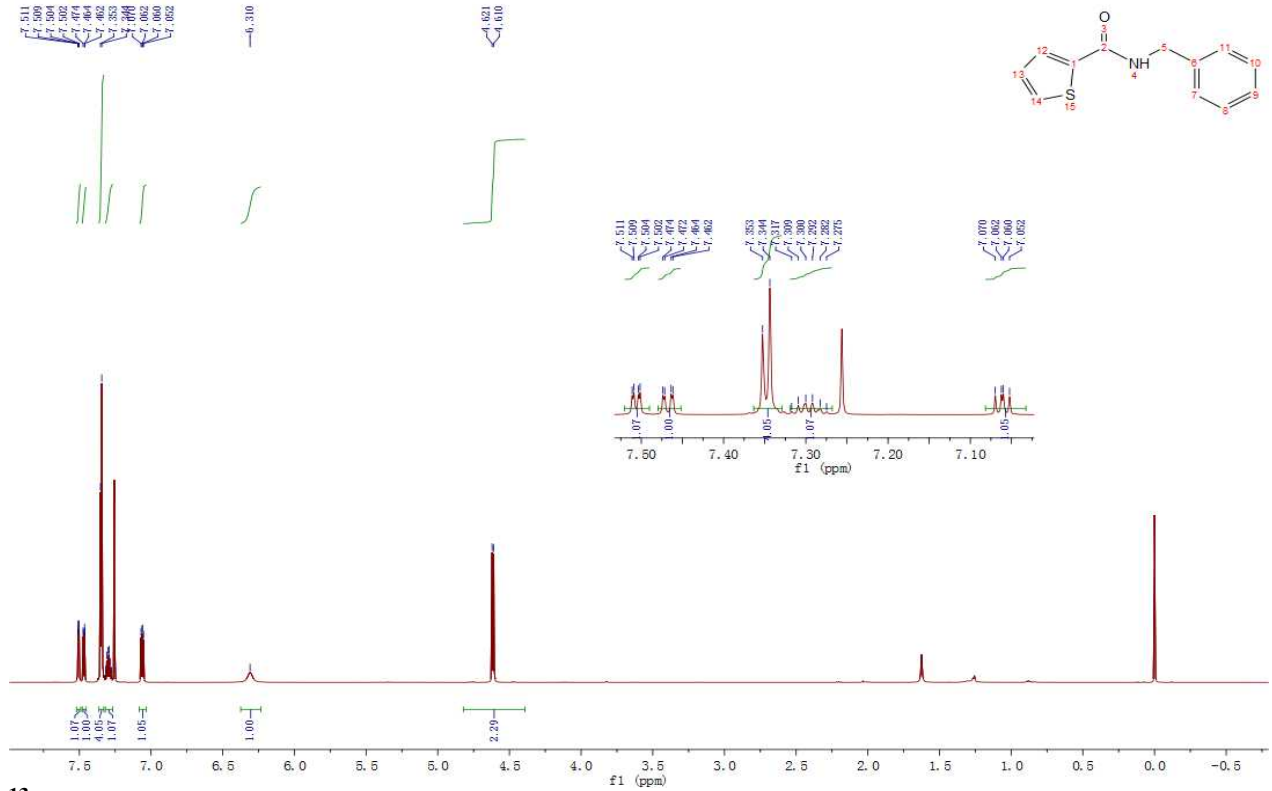

**<sup>13</sup>C NMR**

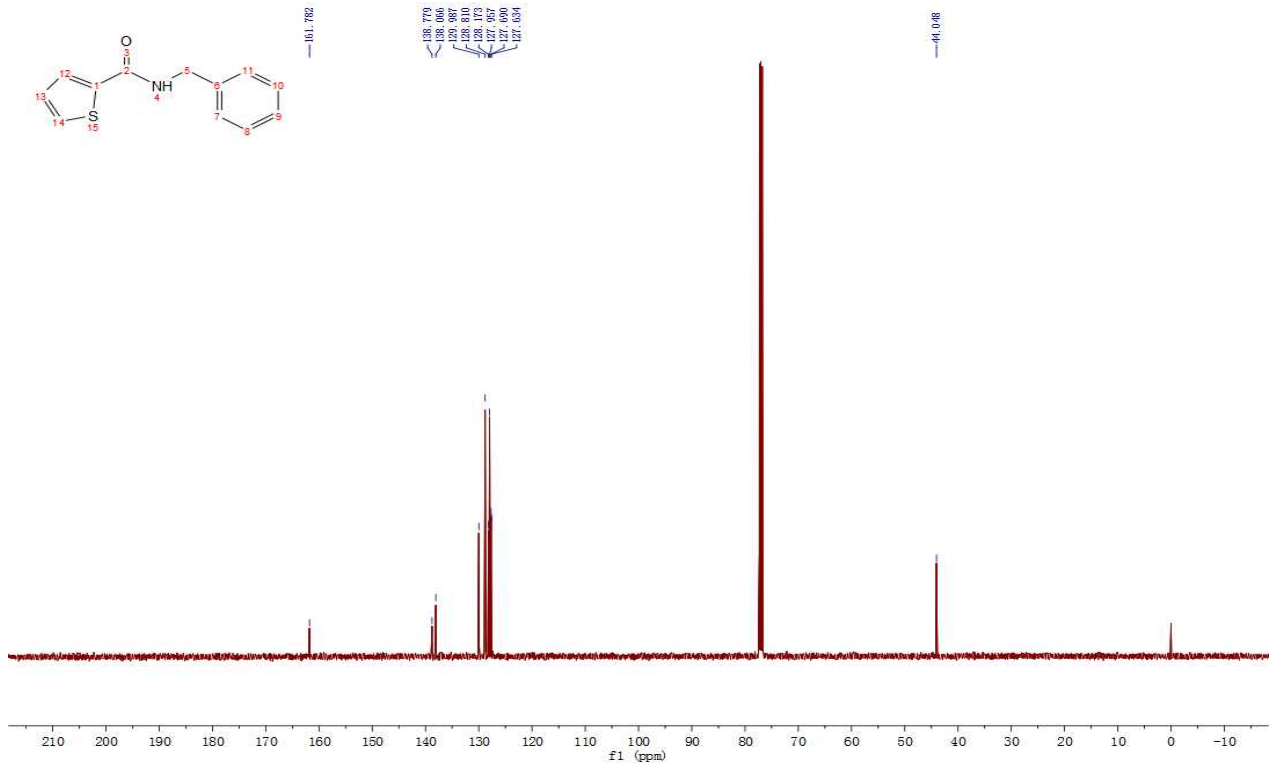

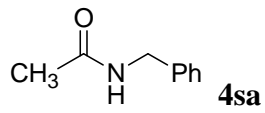

**<sup>1</sup>H NMR**

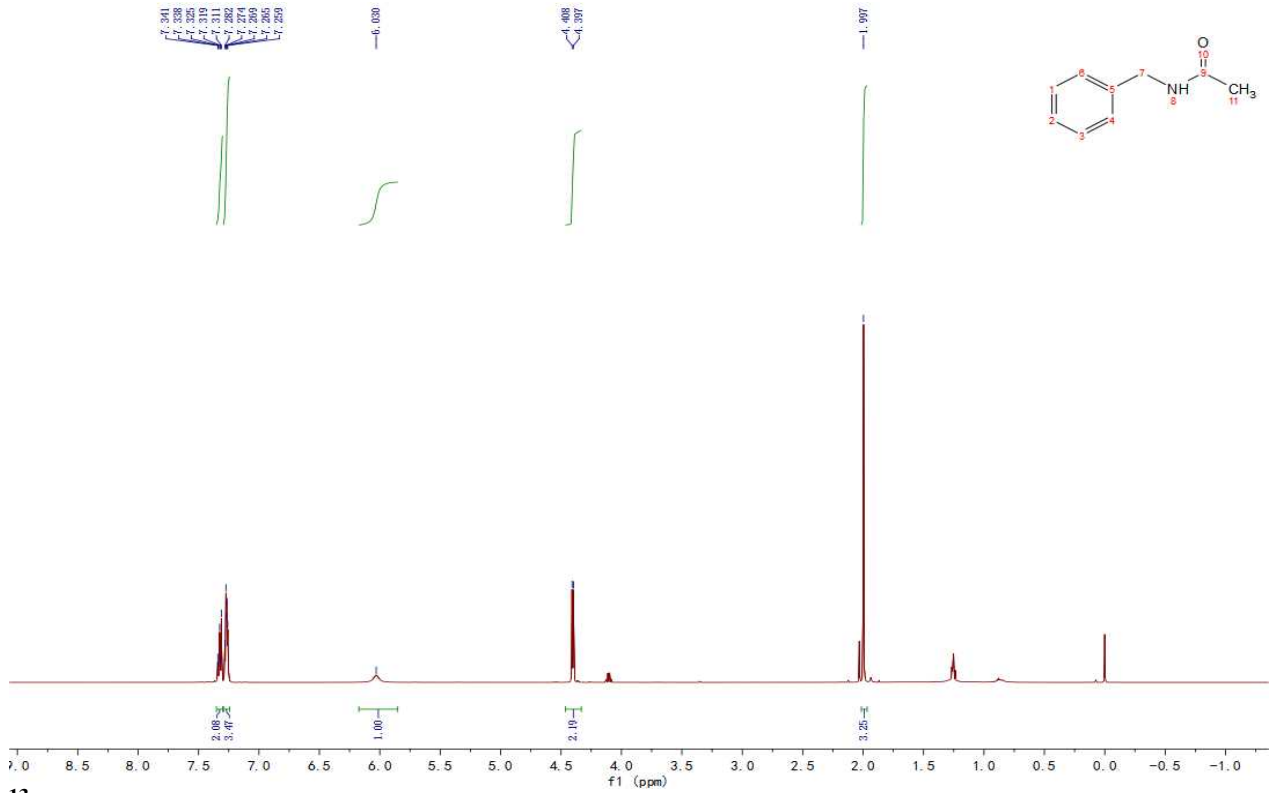

**<sup>13</sup>C NMR**

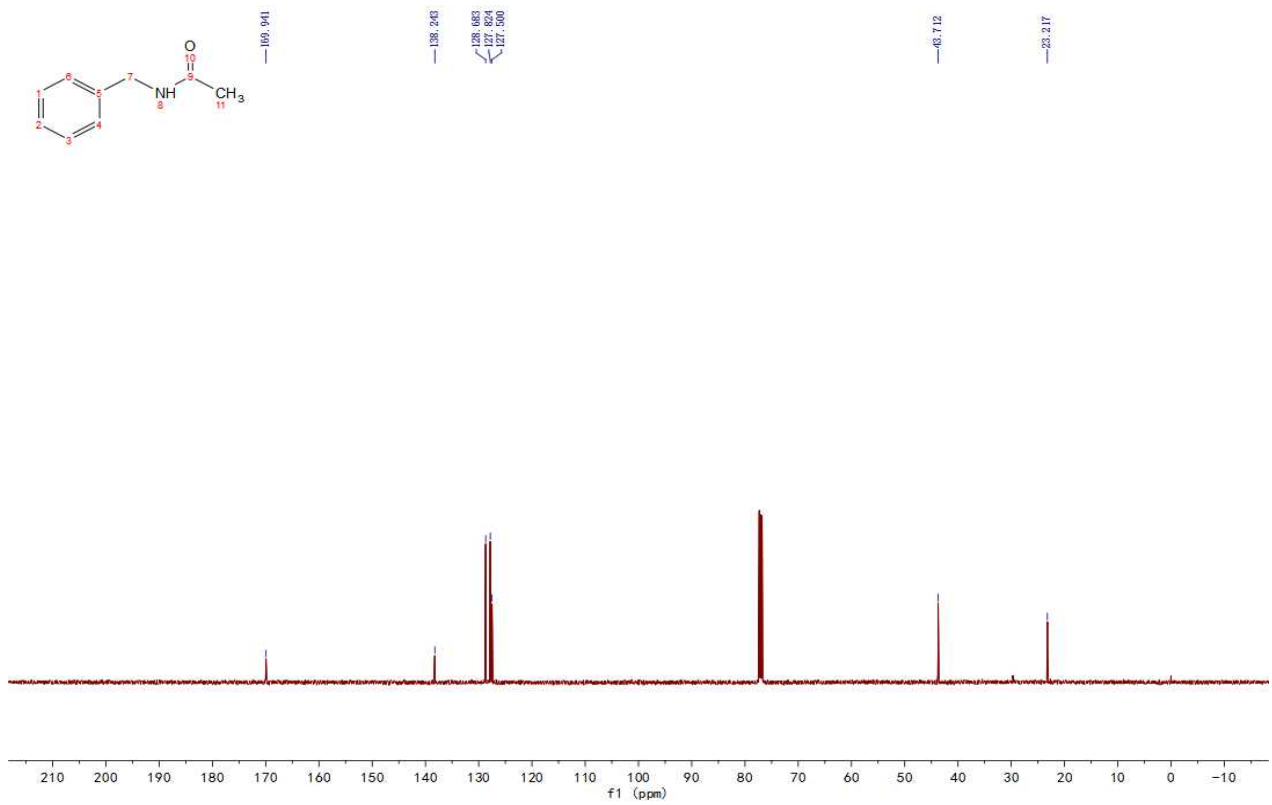

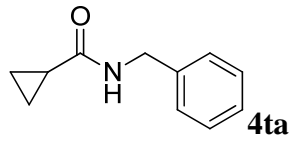

**<sup>1</sup>H NMR**

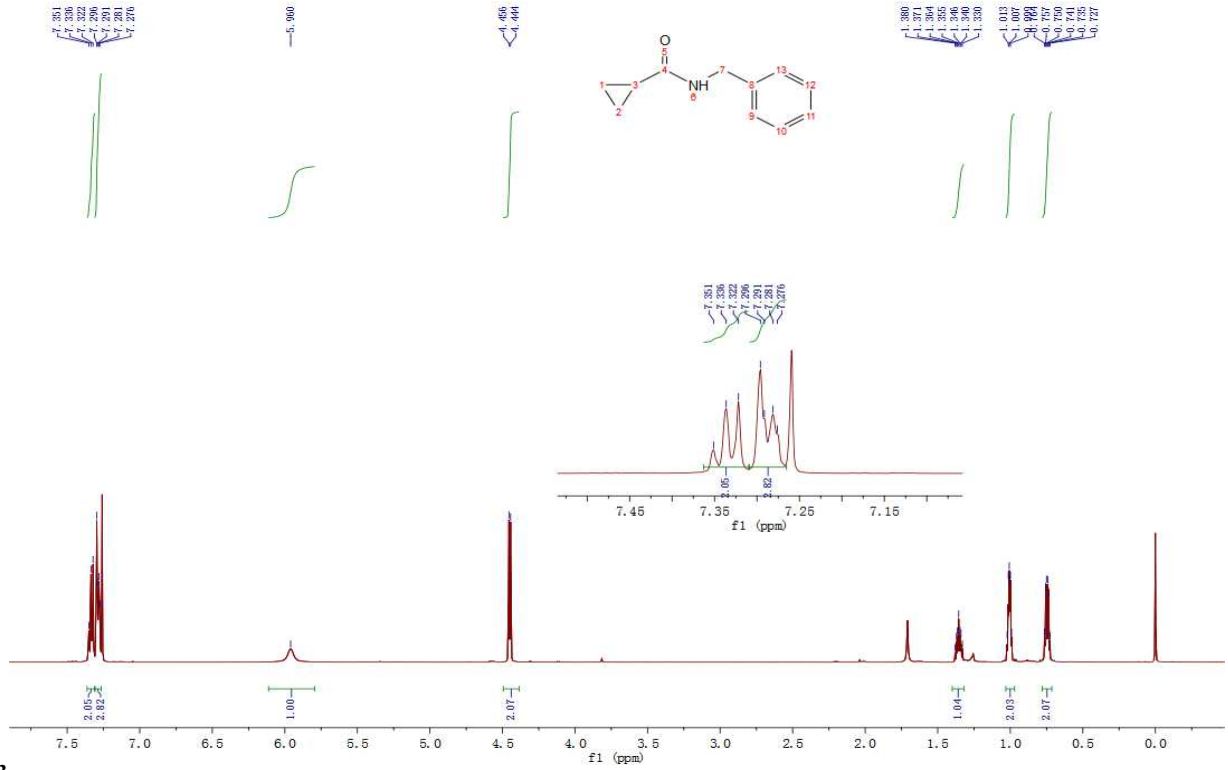

**<sup>13</sup>C NMR**

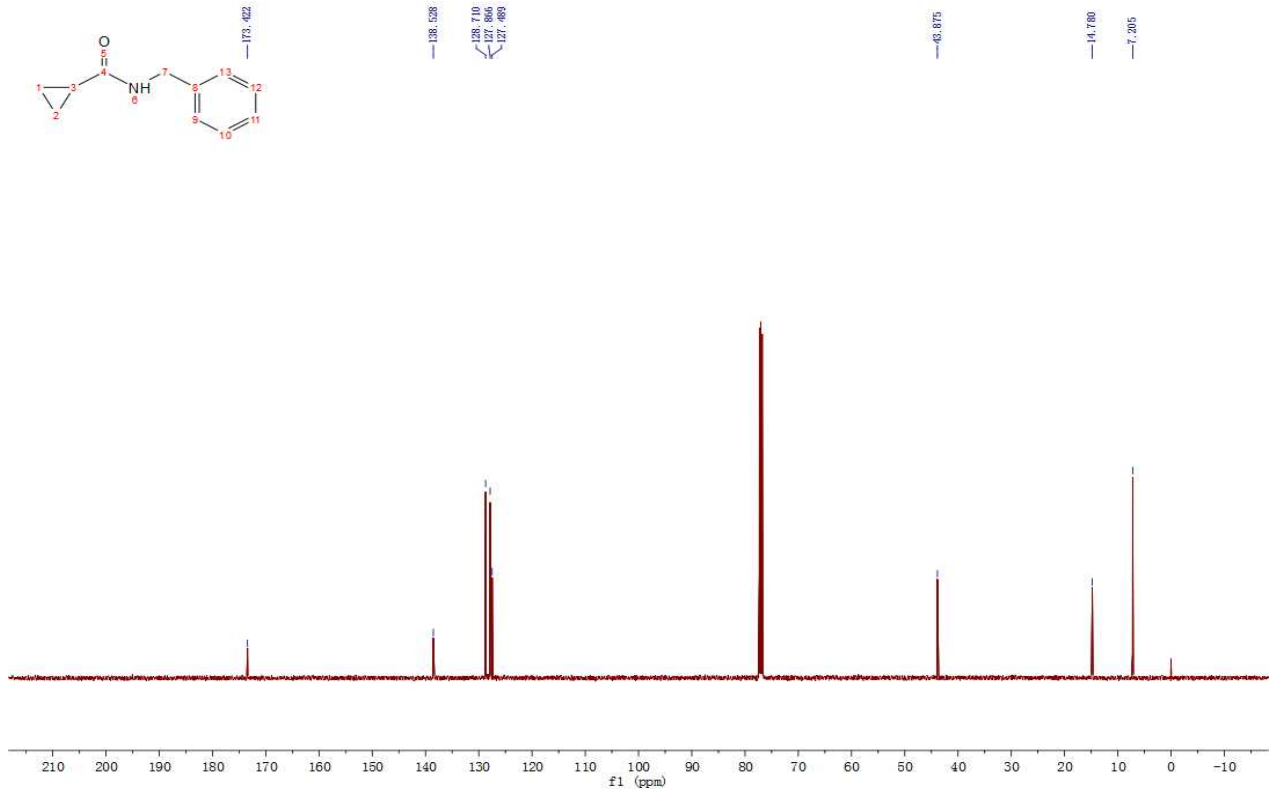

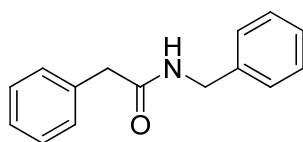

4ua

<sup>1</sup>H NMR

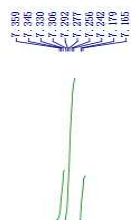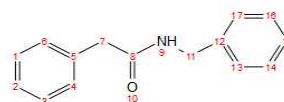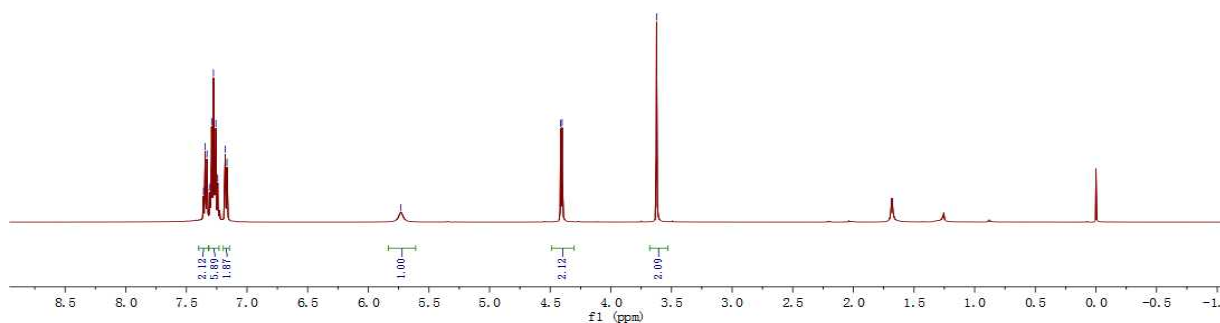

<sup>13</sup>C NMR

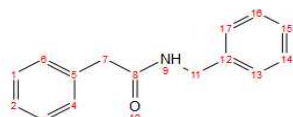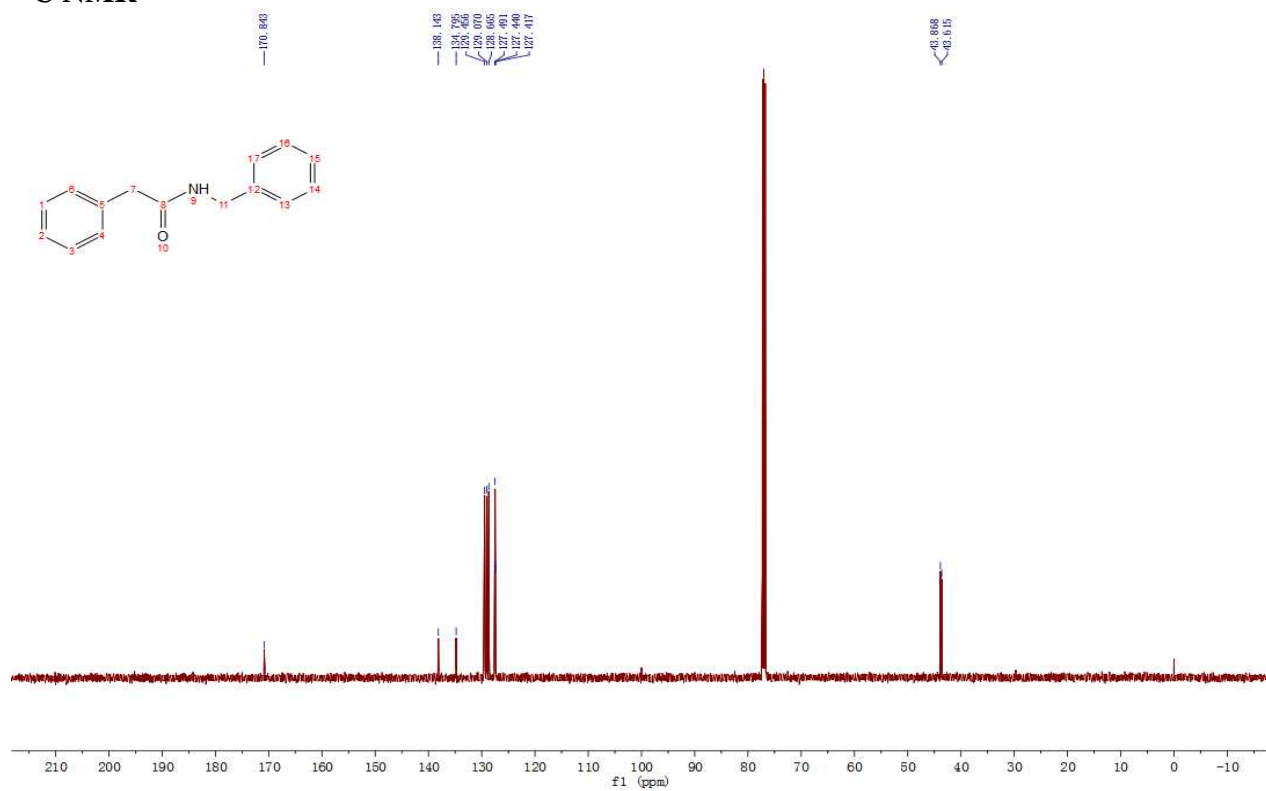

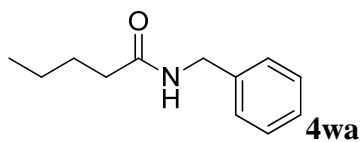

**<sup>1</sup>H NMR**

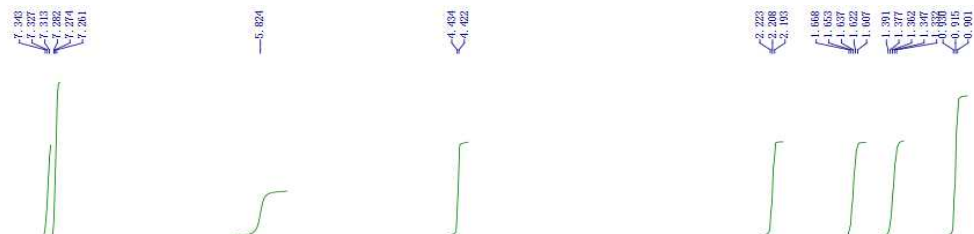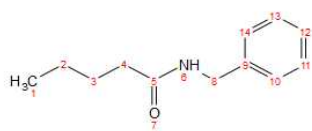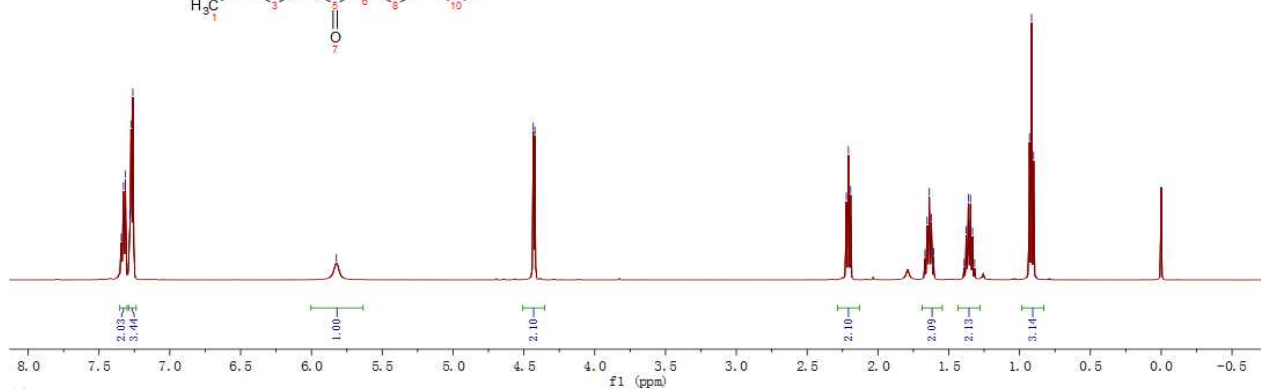

**<sup>13</sup>C NMR**

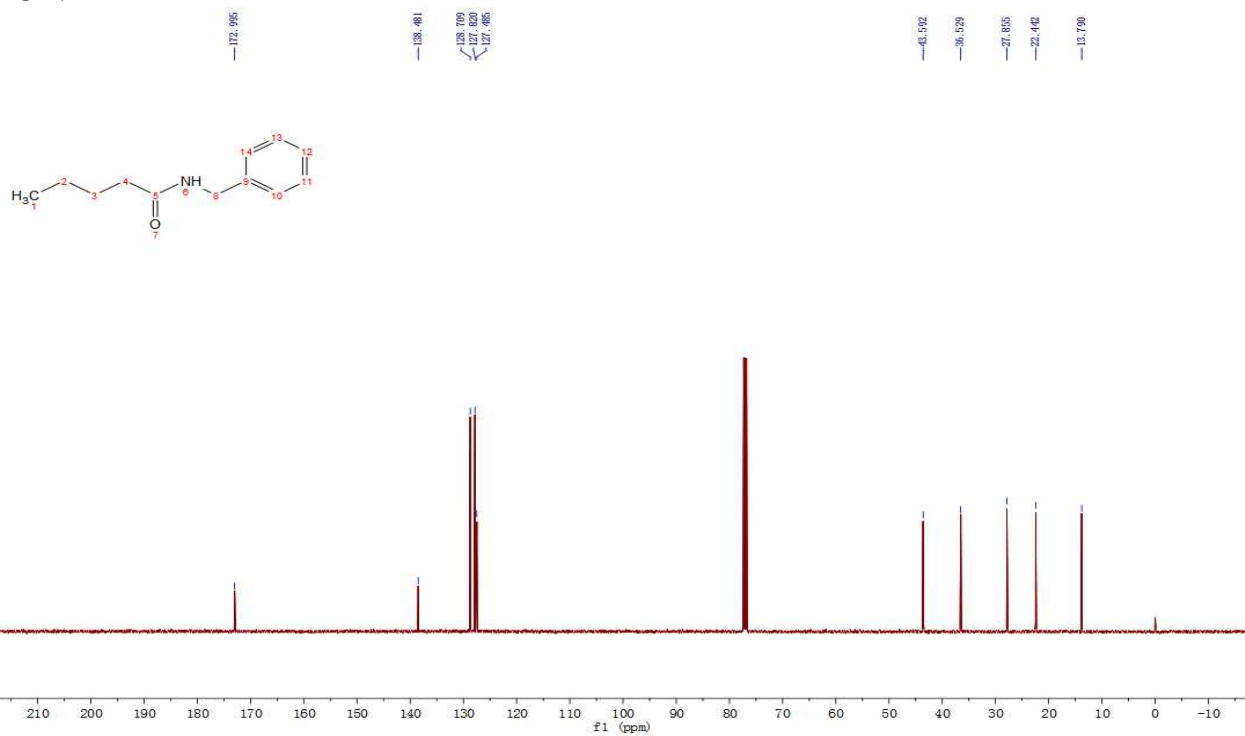

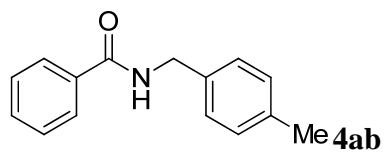

**<sup>1</sup>H NMR**

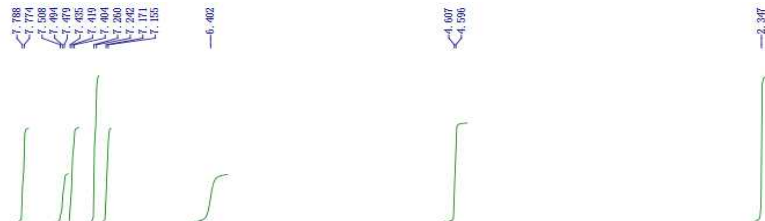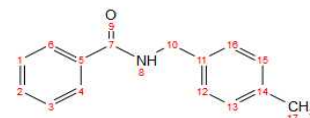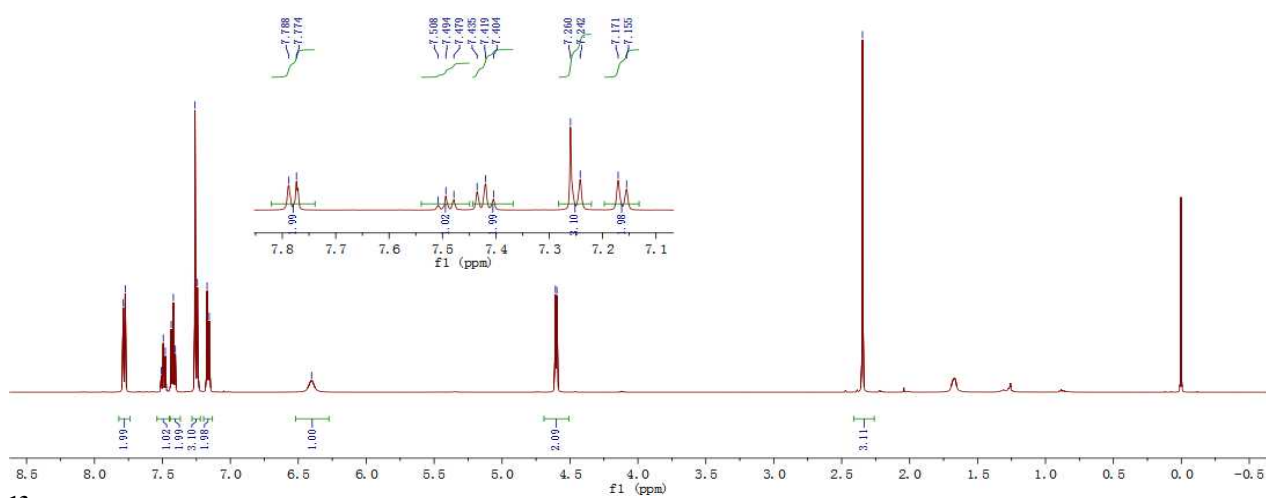

**<sup>13</sup>C NMR**

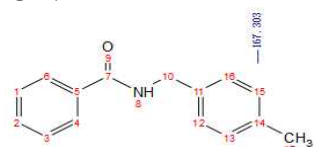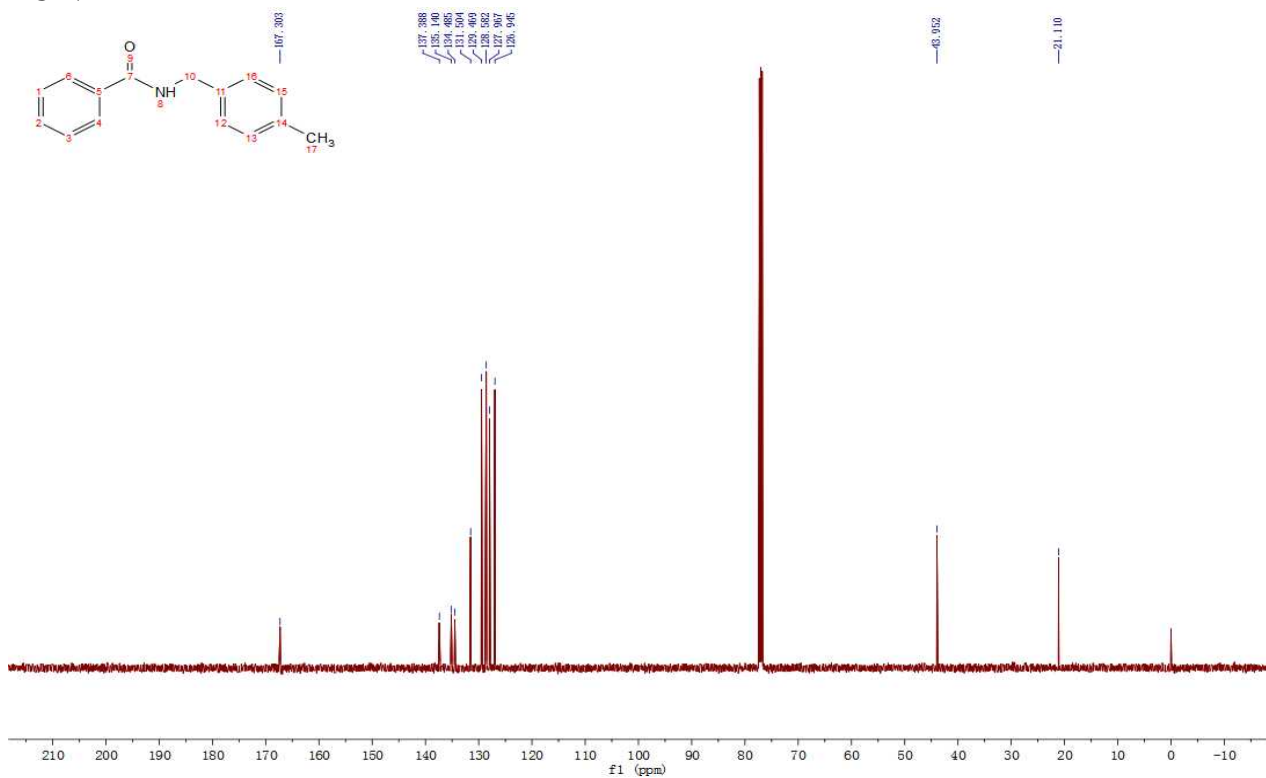

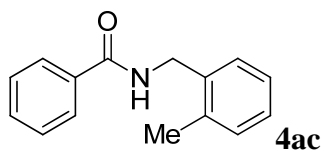

**<sup>1</sup>H NMR**

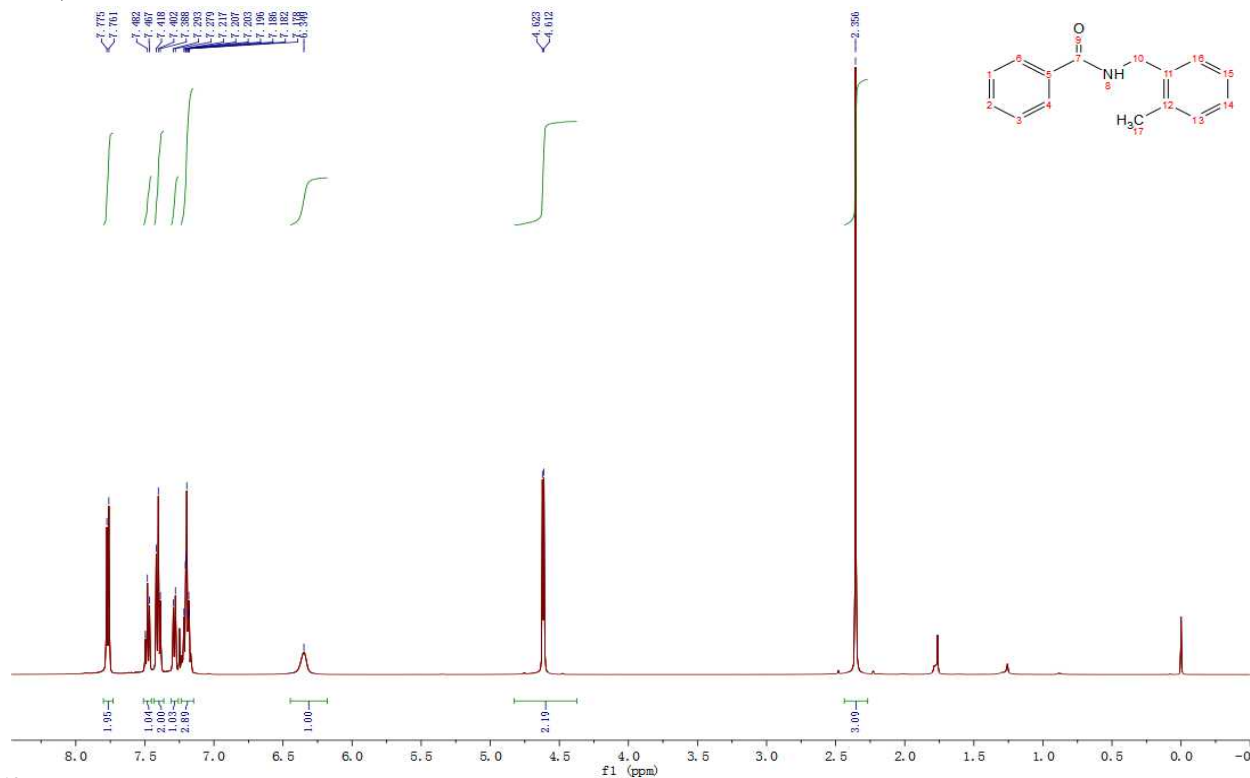

**<sup>13</sup>C NMR**

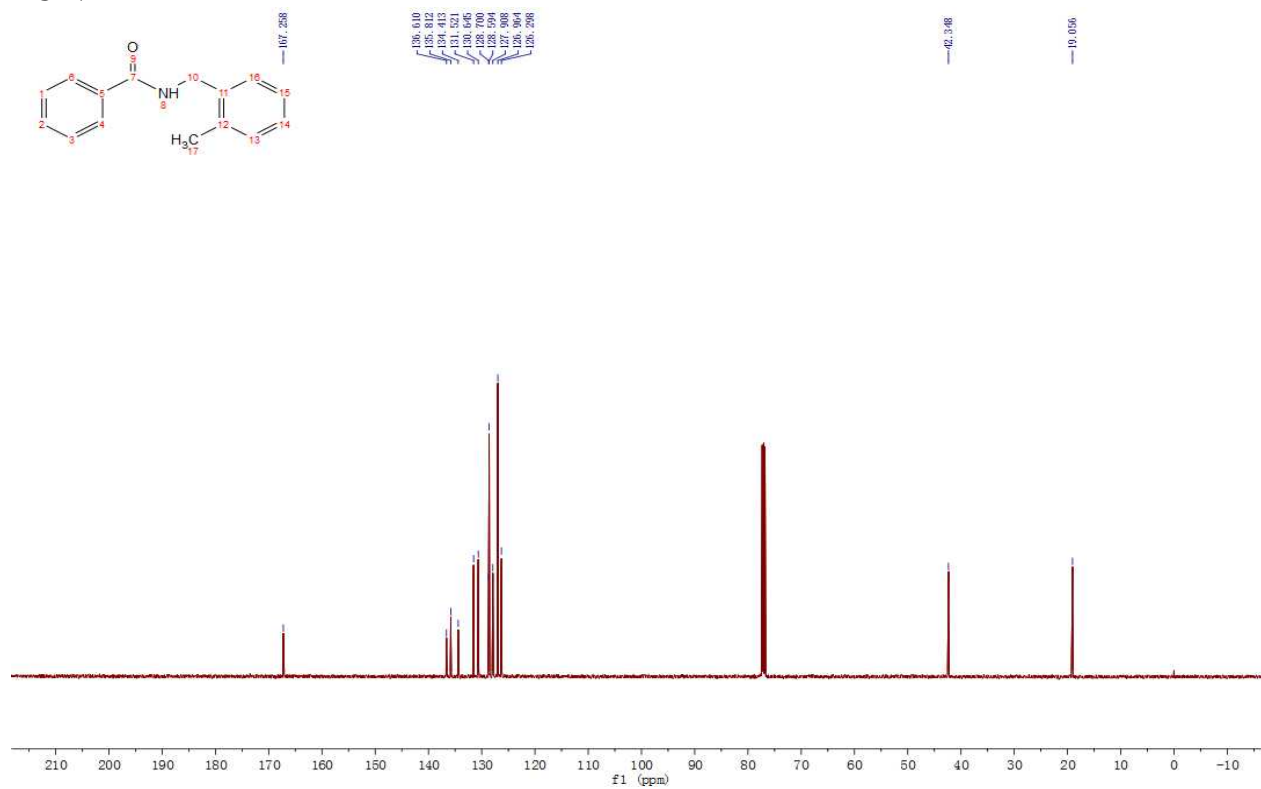

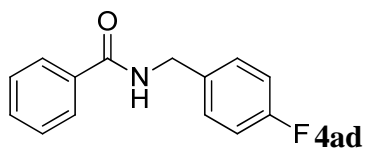

**<sup>1</sup>H NMR**

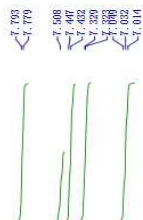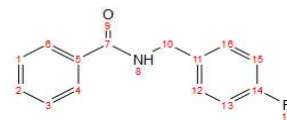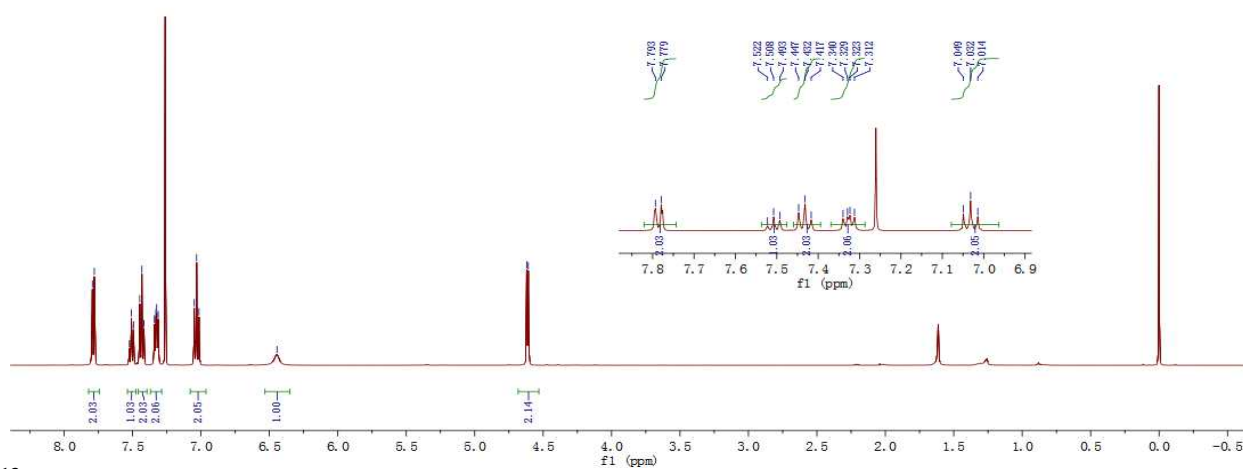

**<sup>13</sup>C NMR**

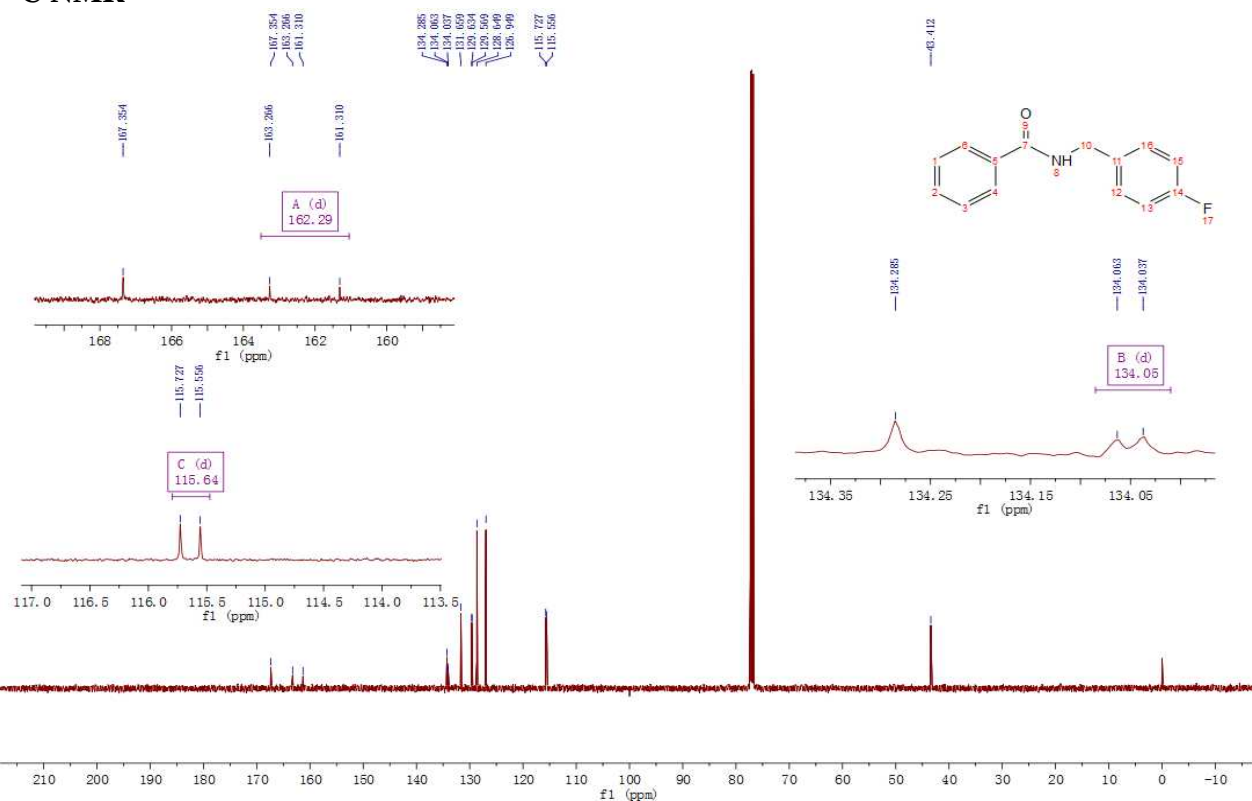



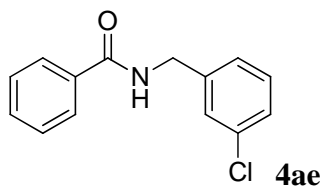

**<sup>1</sup>H NMR**

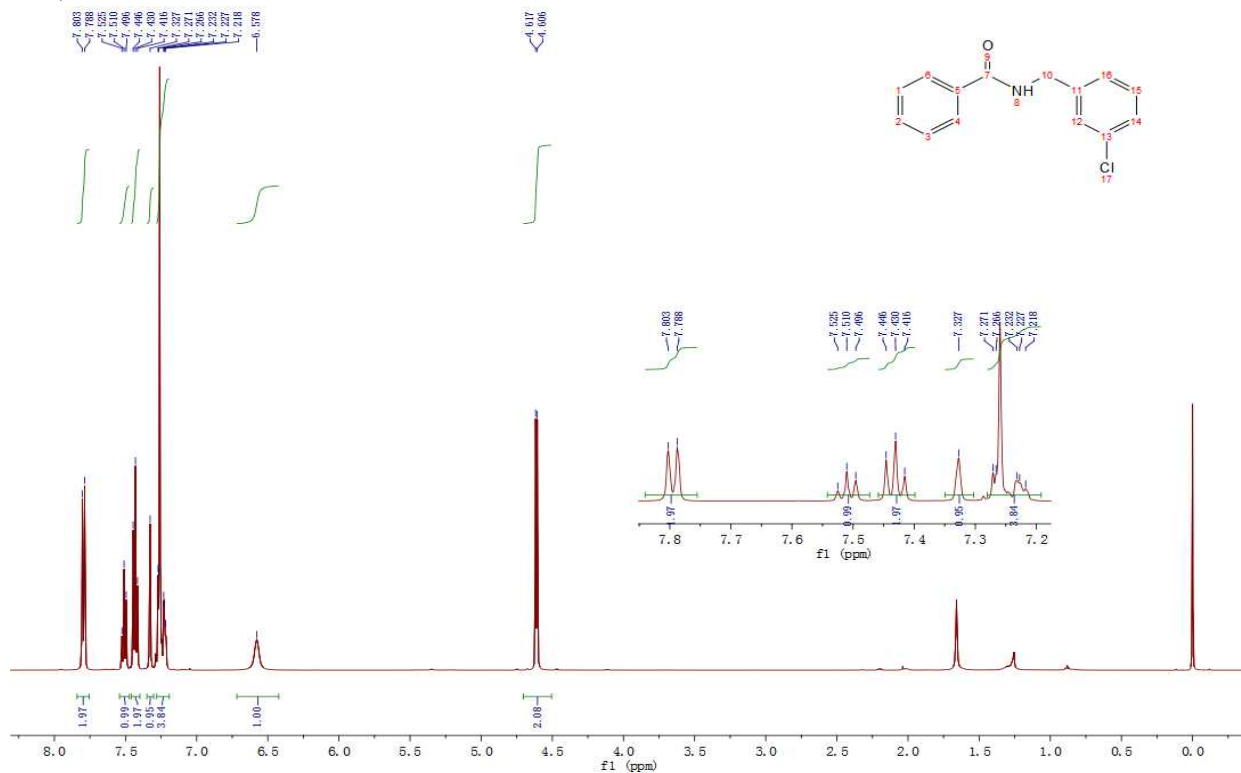

**<sup>13</sup>C NMR**

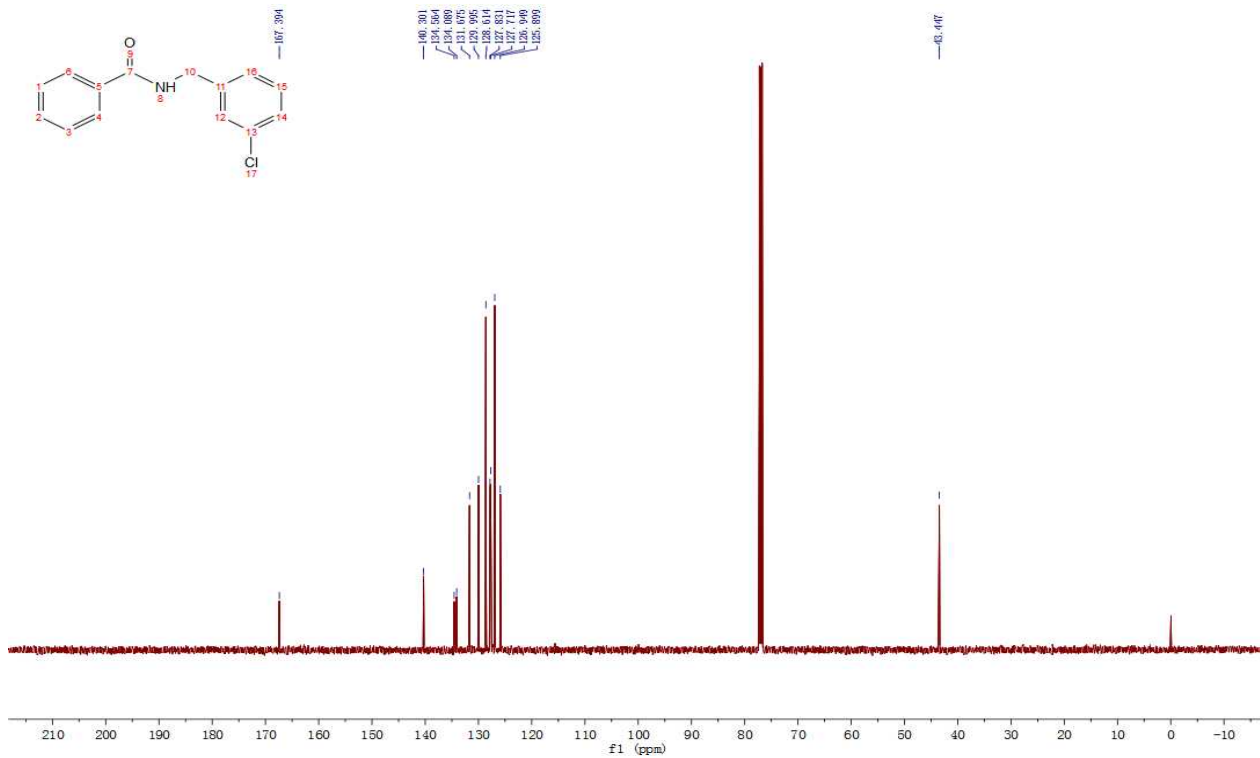

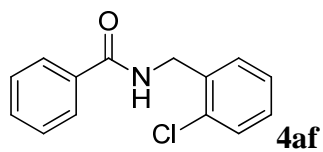

**<sup>1</sup>H NMR**

7.791  
7.777  
7.489  
7.423  
7.421  
7.283  
7.279  
7.239  
7.225  
7.668

7.726  
7.722  
7.724  
7.728

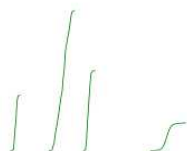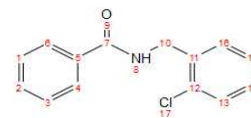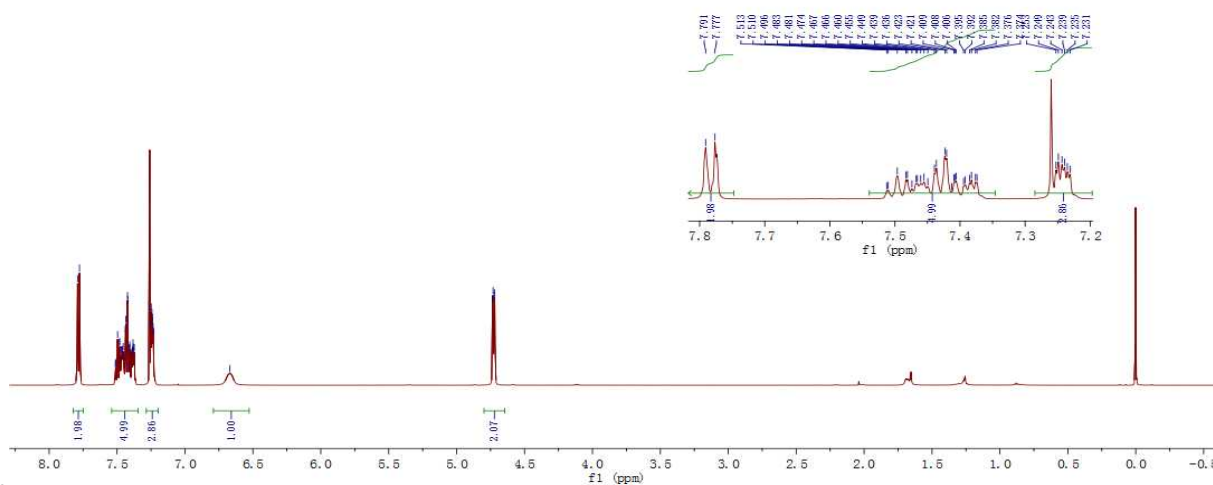

**<sup>13</sup>C NMR**

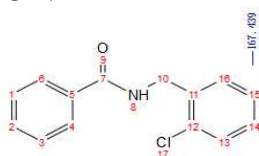

167.439  
135.730  
134.401  
133.513  
131.513  
130.576  
130.559  
129.097  
128.116  
127.294  
127.088

42.188

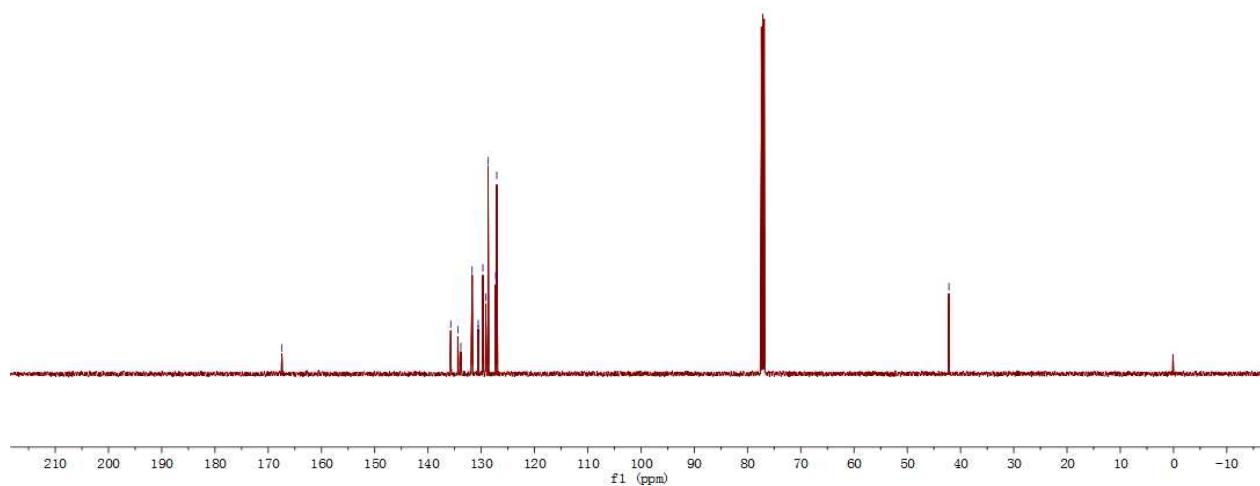

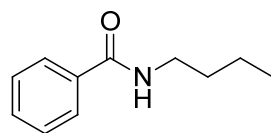

4ag

<sup>1</sup>H NMR

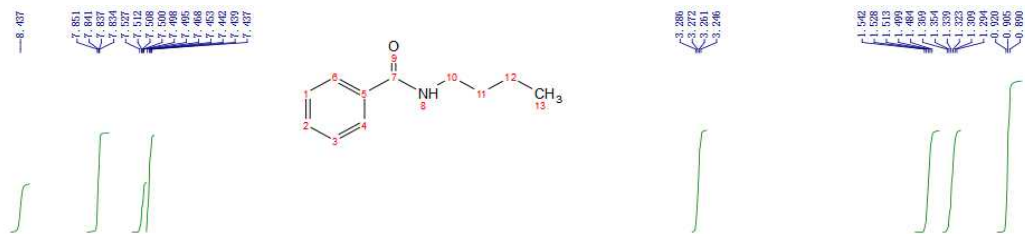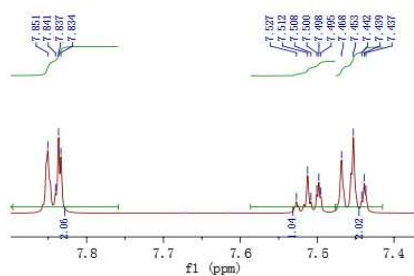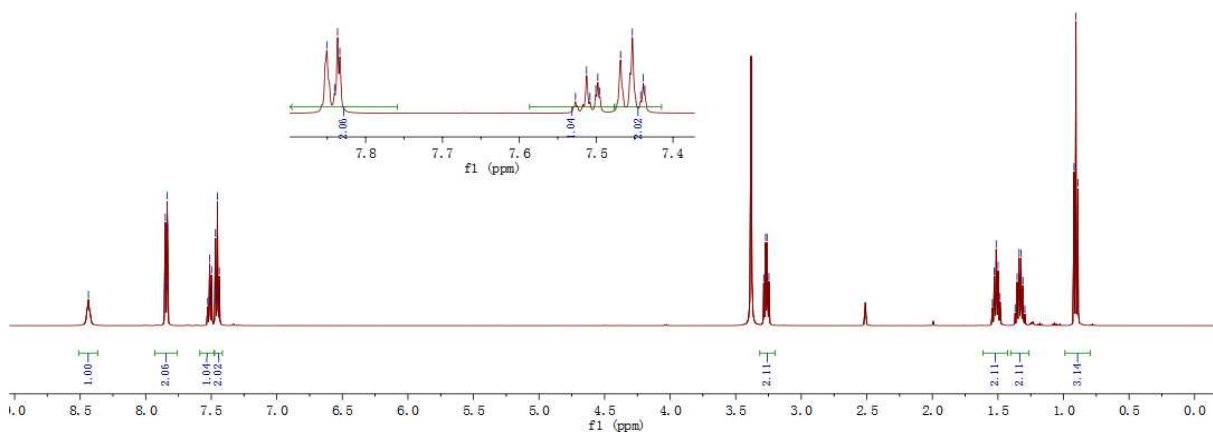

<sup>13</sup>C NMR

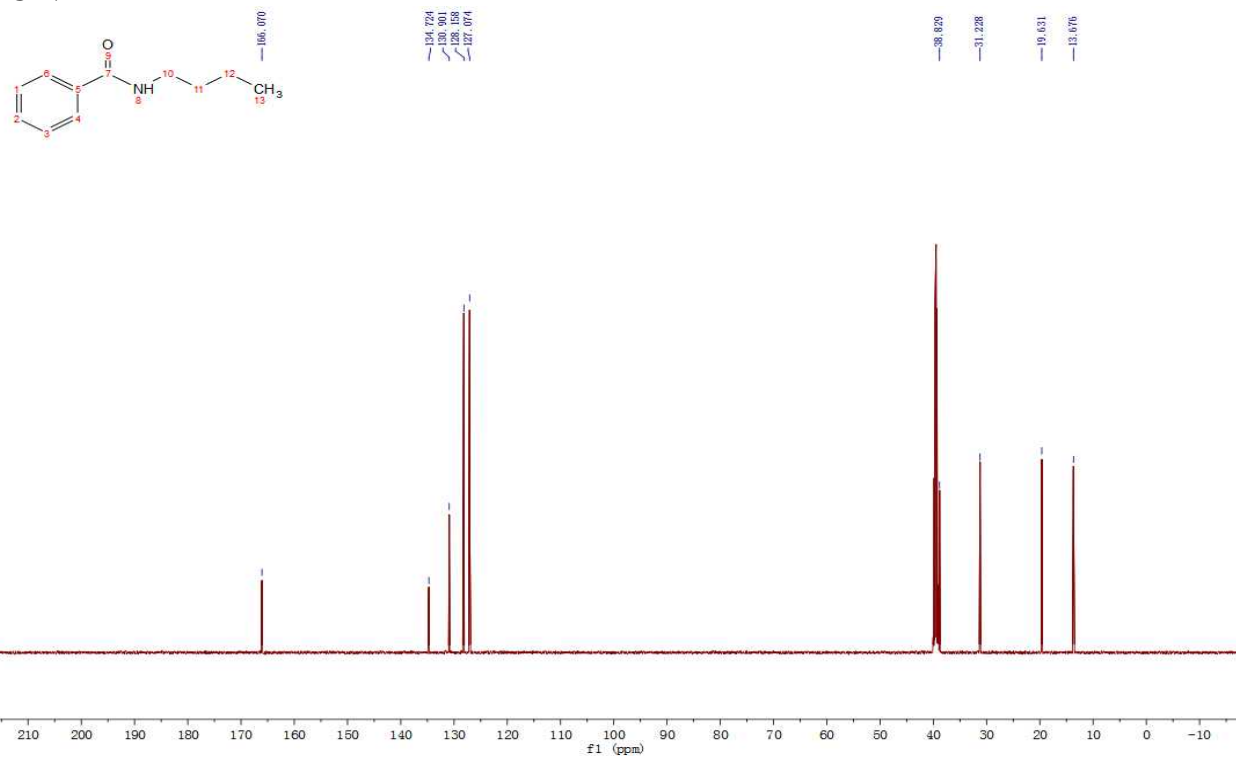

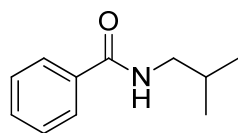

4ah

<sup>1</sup>H NMR

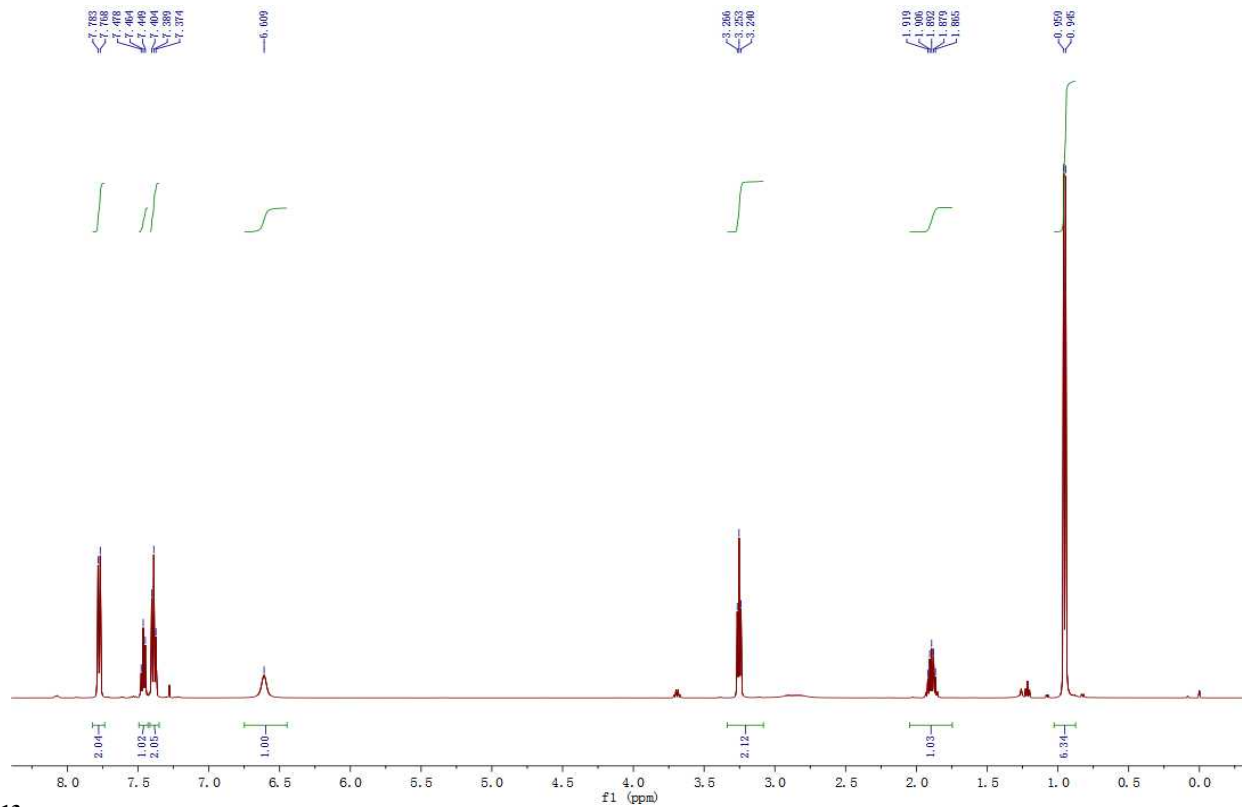

<sup>13</sup>C NMR

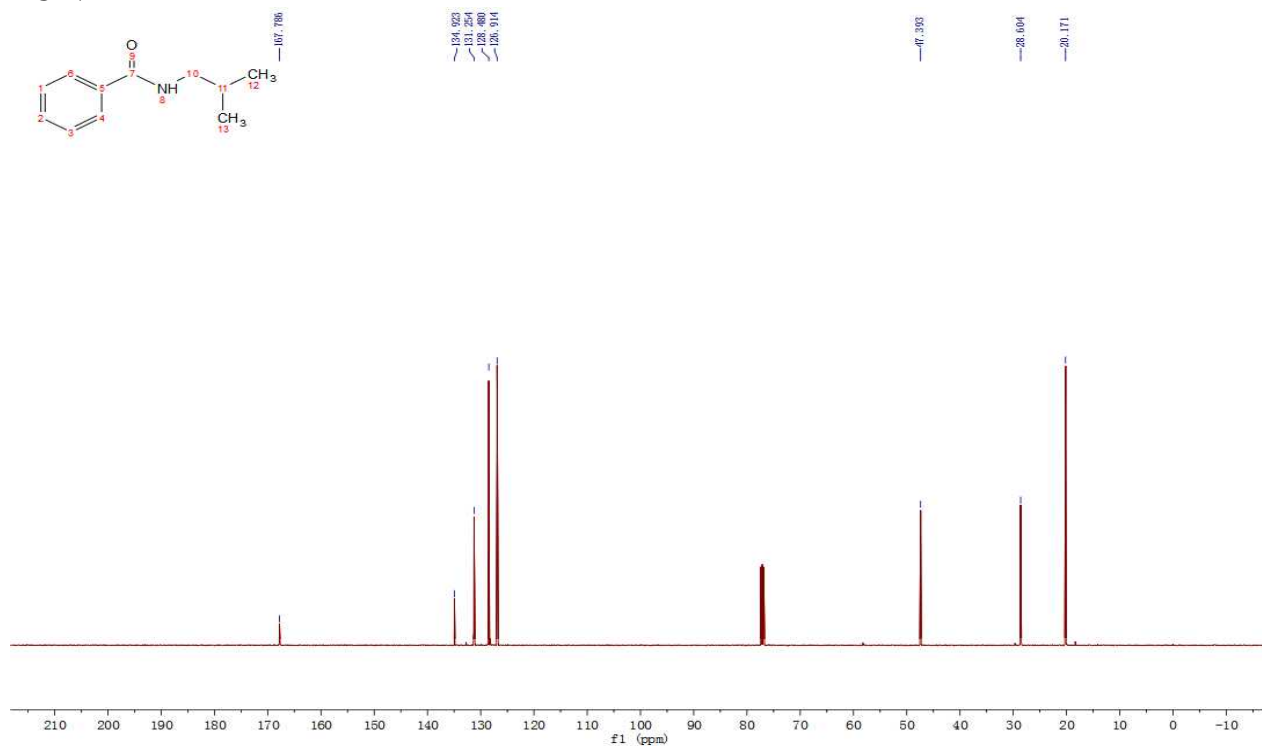

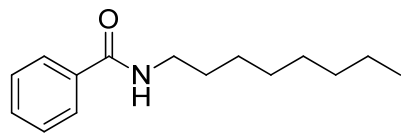

4ai

<sup>1</sup>H NMR

7.767  
7.753  
7.498  
7.483  
7.463  
7.481  
7.477  
7.465  
7.464  
7.423  
7.414  
7.399

-6.397

3.468  
3.444  
3.422  
3.400  
3.418

1.635  
1.611  
1.604  
1.592  
1.577  
1.314  
1.298  
1.286  
1.275  
1.263  
1.251  
1.239  
1.227  
1.215

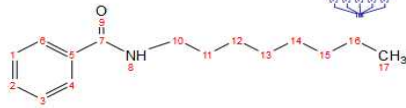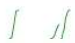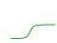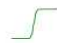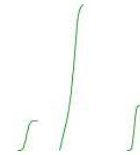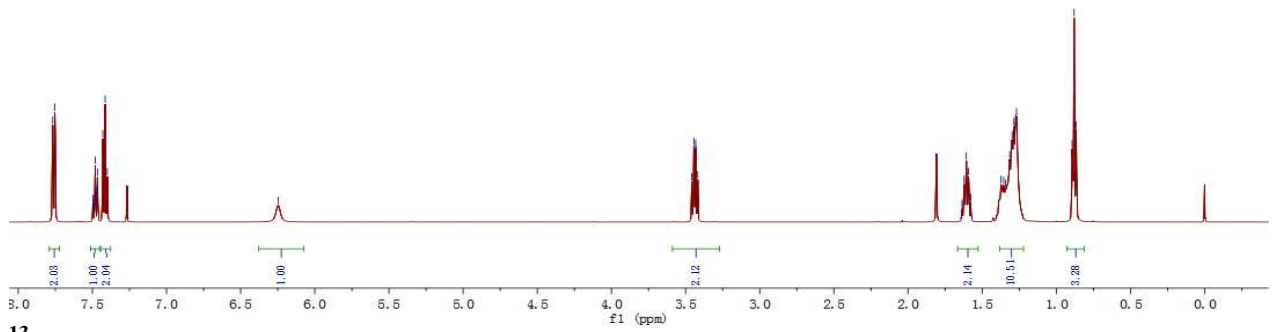

<sup>13</sup>C NMR

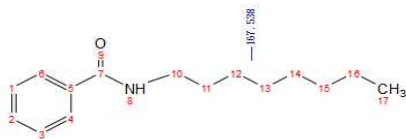

134.920  
133.568  
131.572  
126.811

-0.135  
-31.794  
-29.897  
-29.288  
-27.019  
-22.632  
-14.069

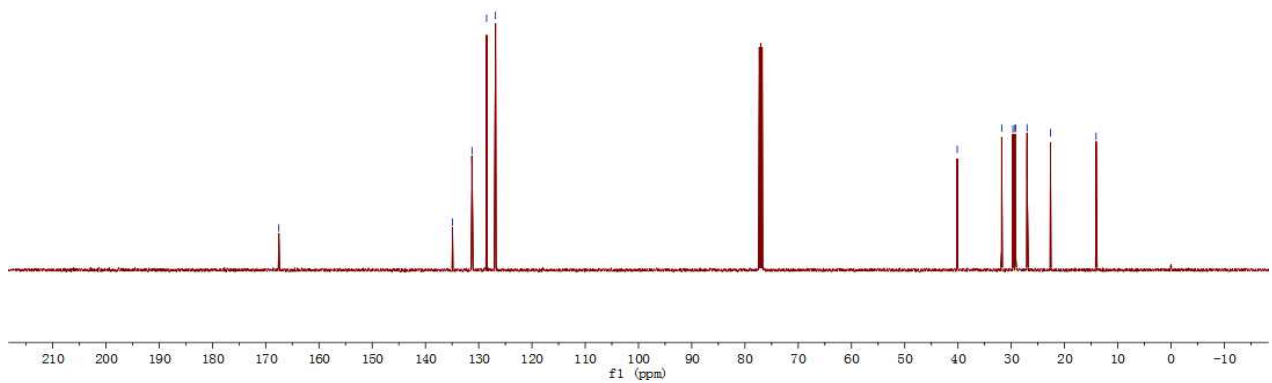

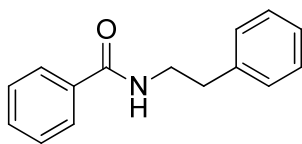

4aj

<sup>1</sup>H NMR

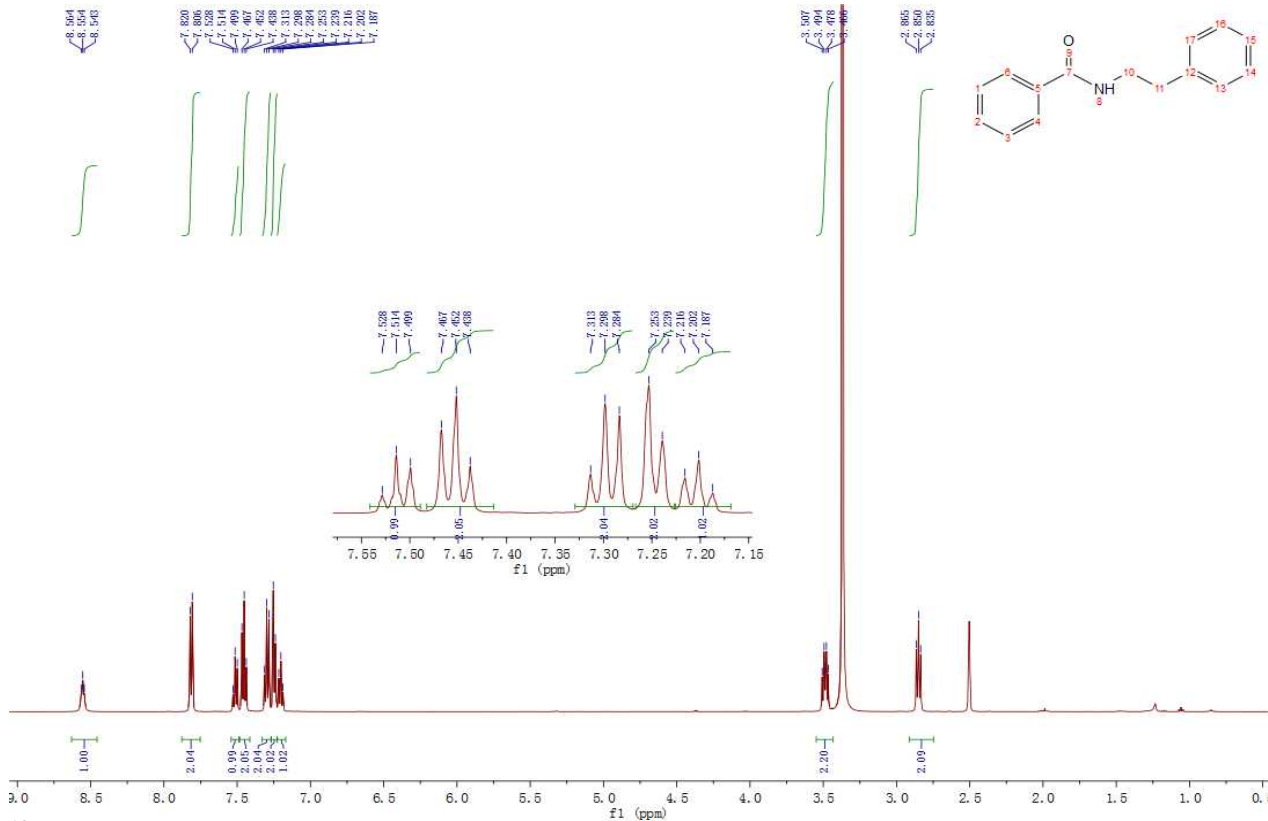

<sup>13</sup>C NMR

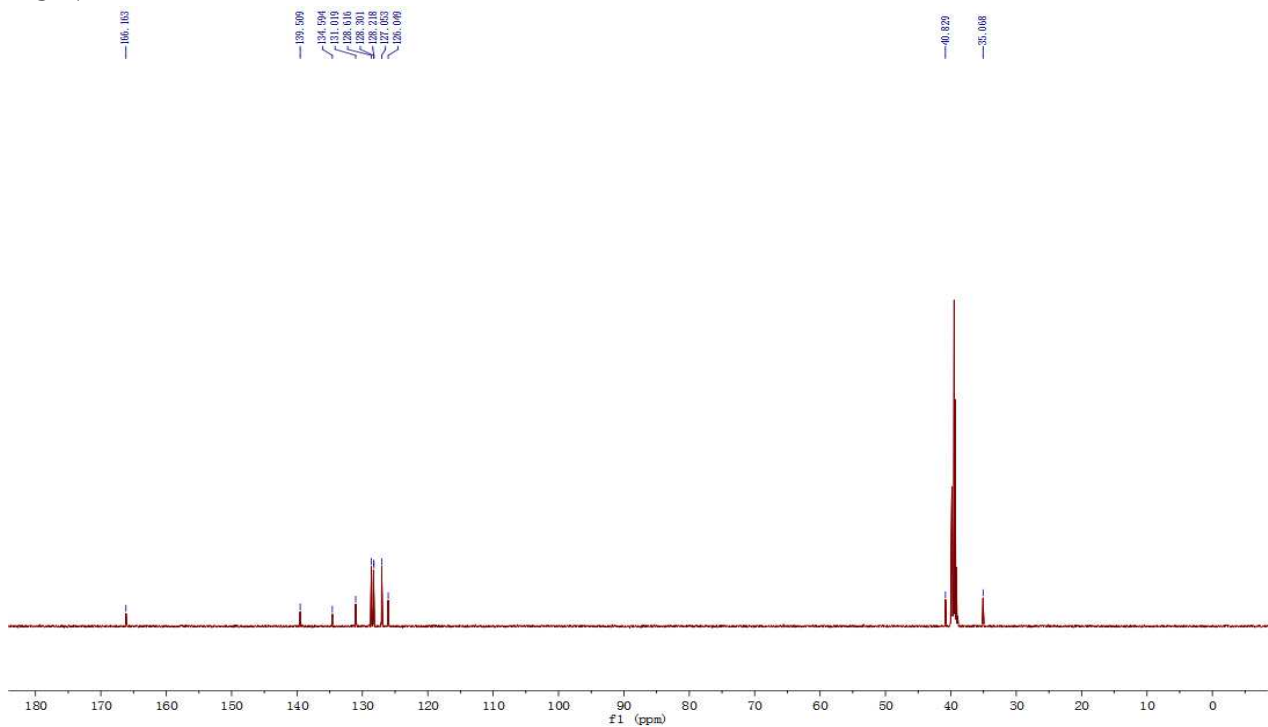

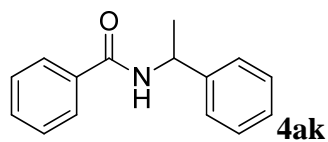

**<sup>1</sup>H NMR**

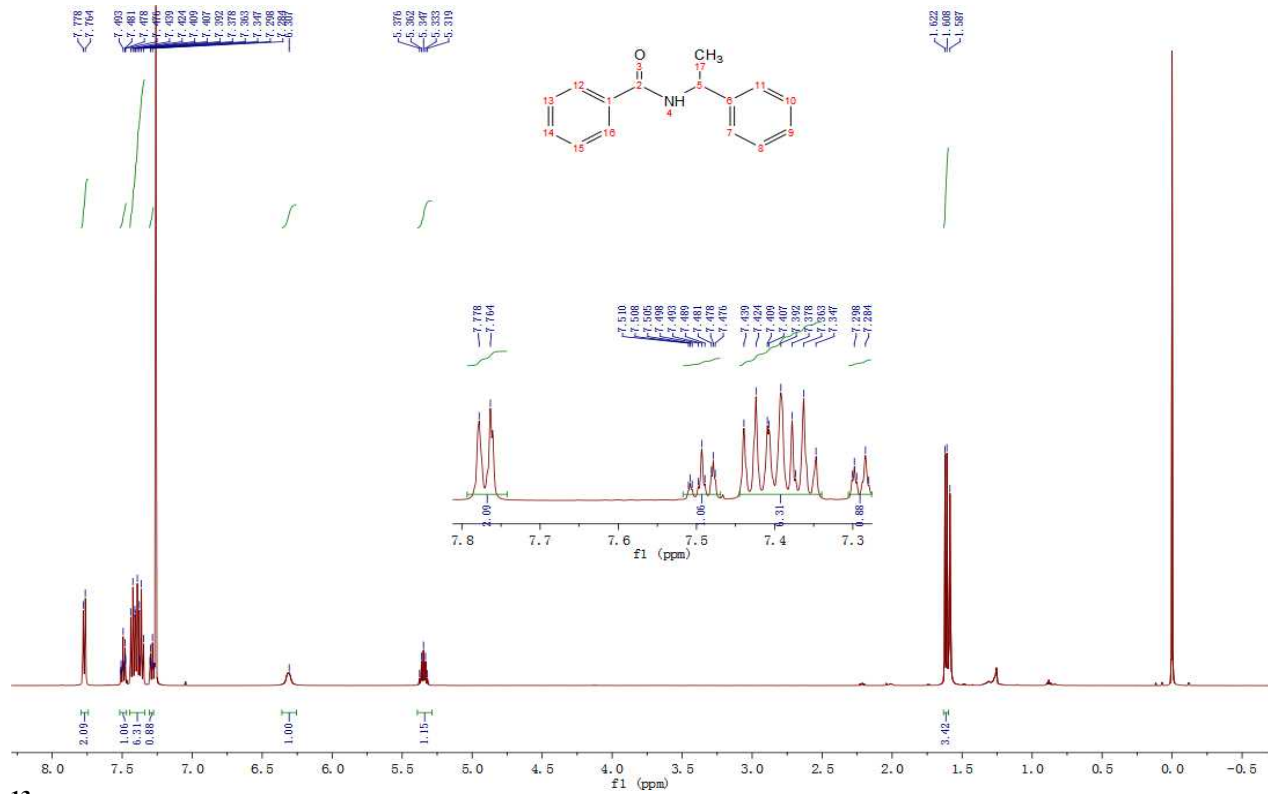

**<sup>13</sup>C NMR**

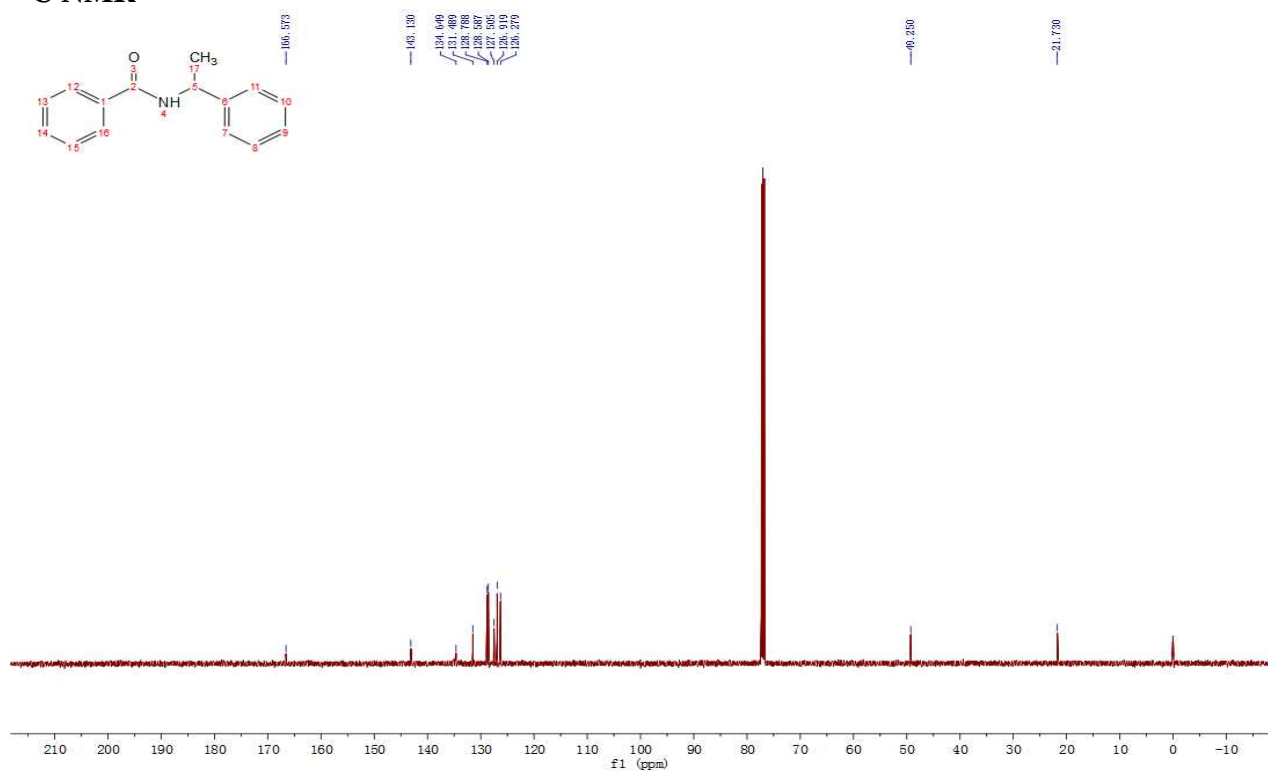

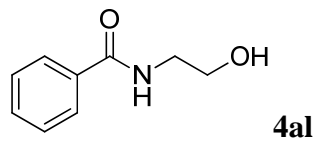

**<sup>1</sup>H NMR**

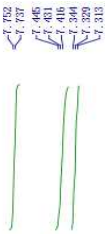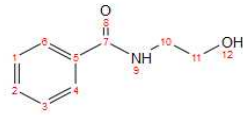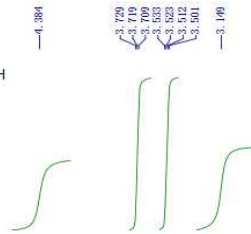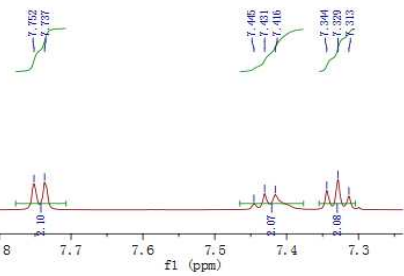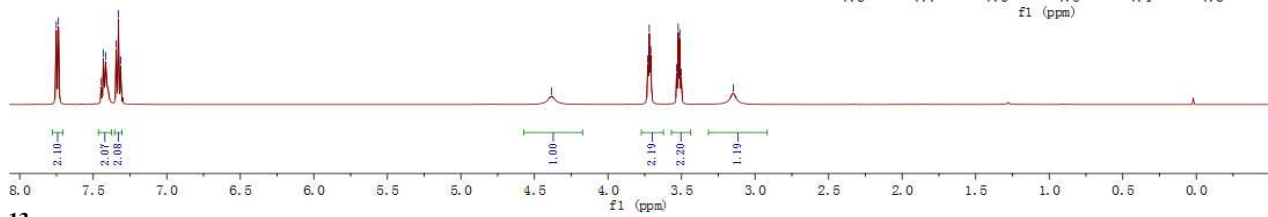

**<sup>13</sup>C NMR**

168.862

134.040  
131.604  
129.800  
127.016

61.505

42.725

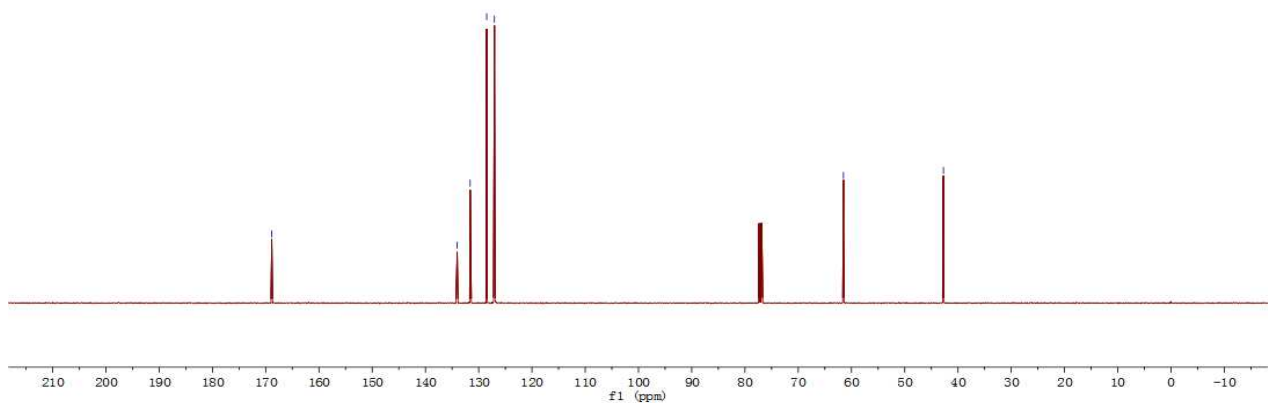



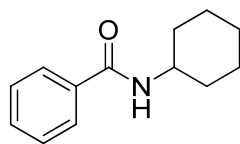

4am

<sup>1</sup>H NMR

7.756  
7.741  
7.695  
7.667  
7.634  
7.619  
7.604

5.988

4.011  
4.002  
3.995  
3.989  
3.981  
3.974  
3.967  
3.961  
3.952

2.040  
2.043  
2.025  
2.018  
1.976  
1.976  
1.769  
1.761  
1.760  
1.750  
1.670  
1.662  
1.641  
1.641  
1.675  
1.662  
1.645  
1.616  
1.401  
1.394  
1.388  
1.376  
1.371  
1.354  
1.286  
1.224  
1.196

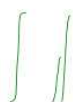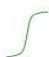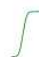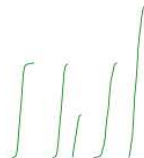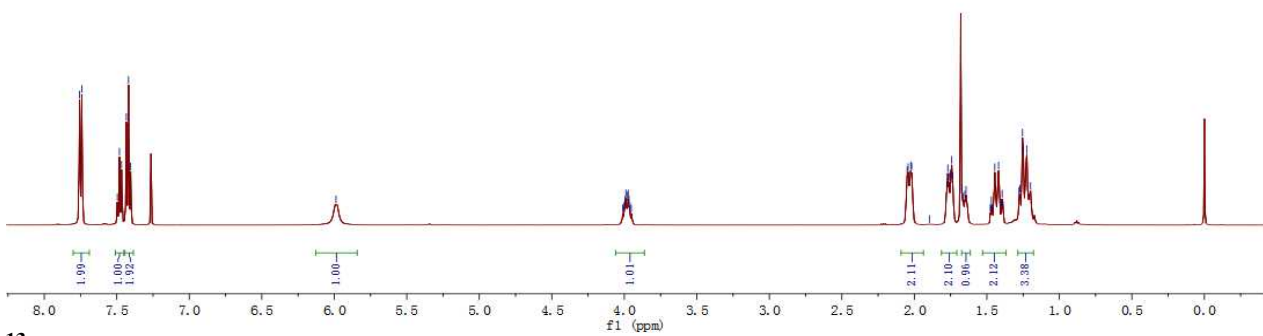

<sup>13</sup>C NMR

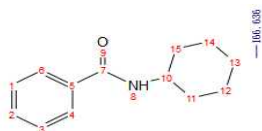

195.197  
193.522  
138.526  
136.818

88.616

33.250

25.195  
24.919

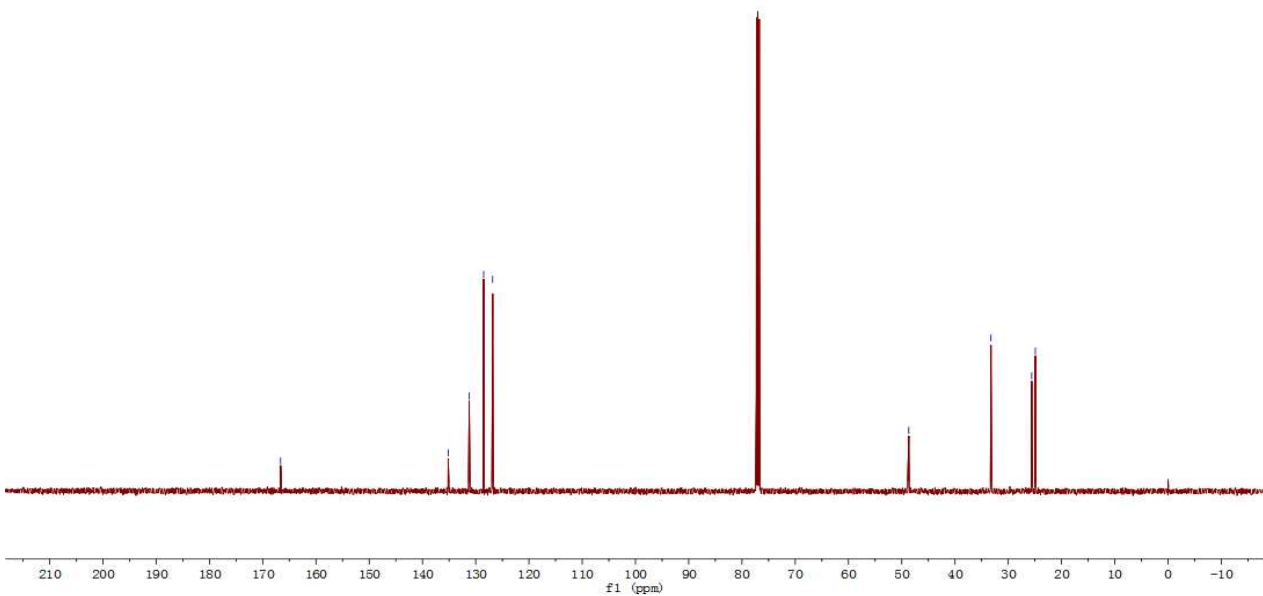

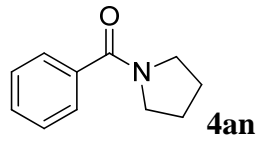

**<sup>1</sup>H NMR**

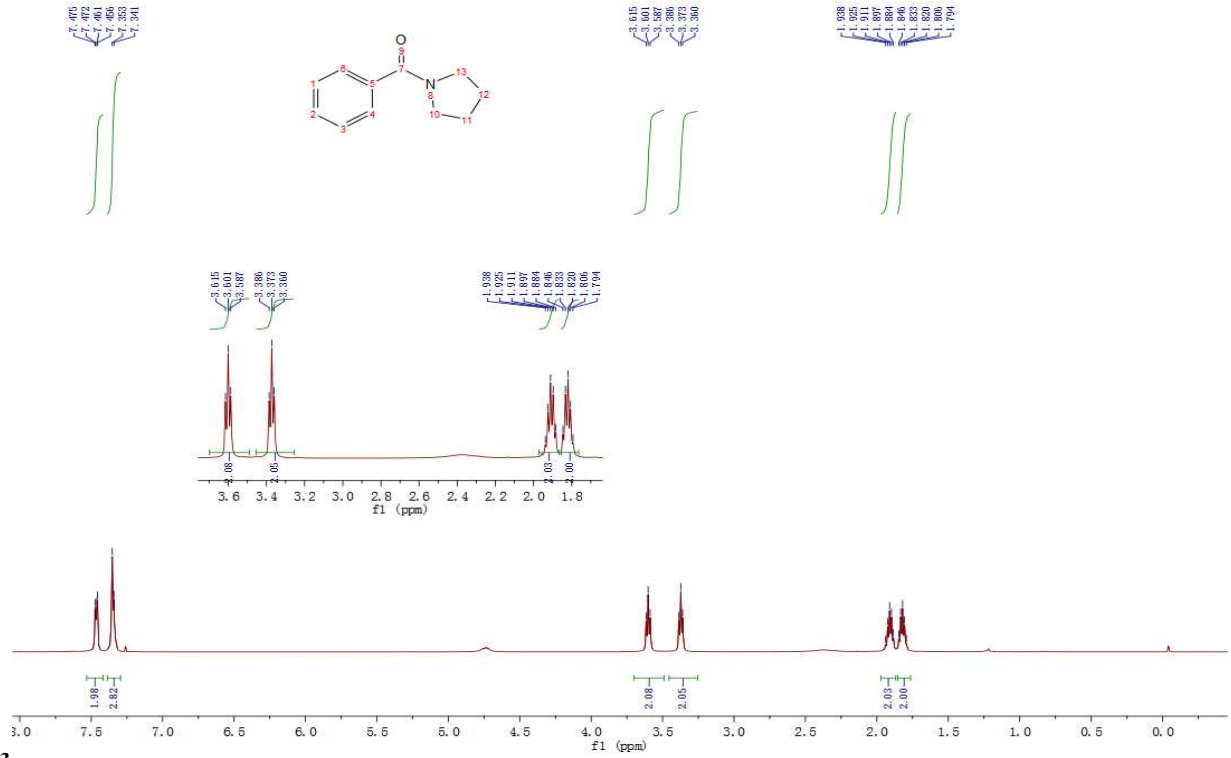

**<sup>13</sup>C NMR**

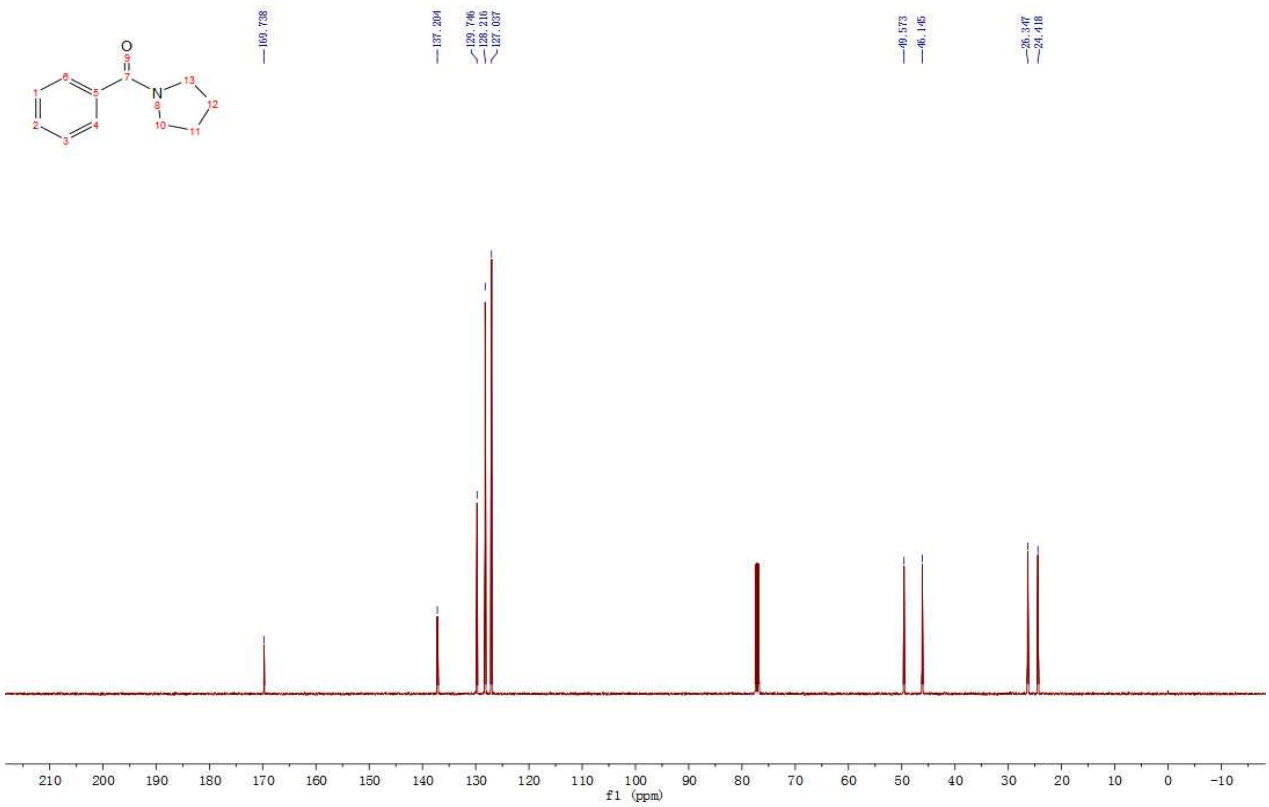

# <sup>1</sup>H NMR

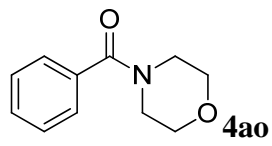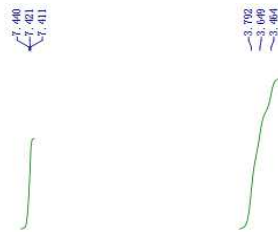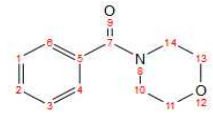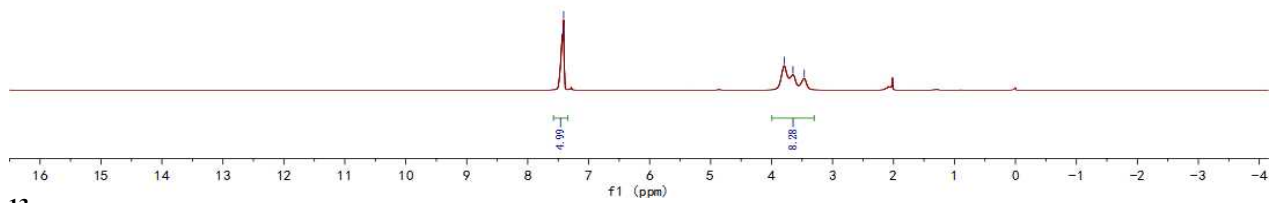

# <sup>13</sup>C NMR

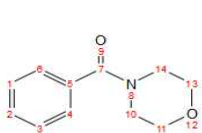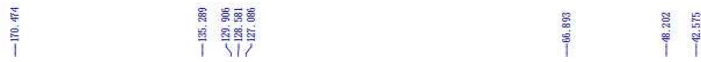

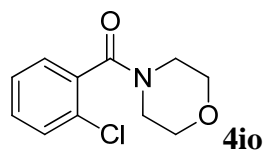

**<sup>1</sup>H NMR**

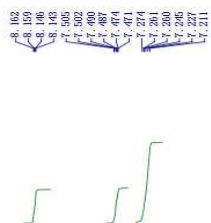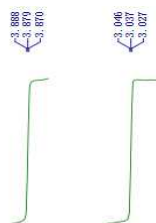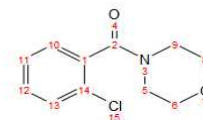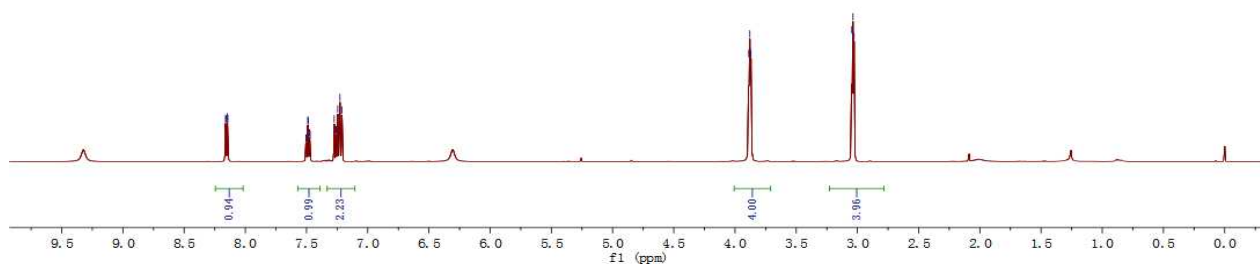

**<sup>13</sup>C NMR**

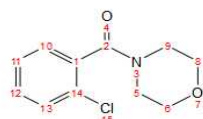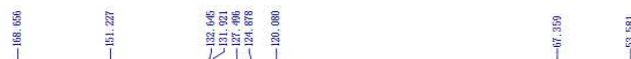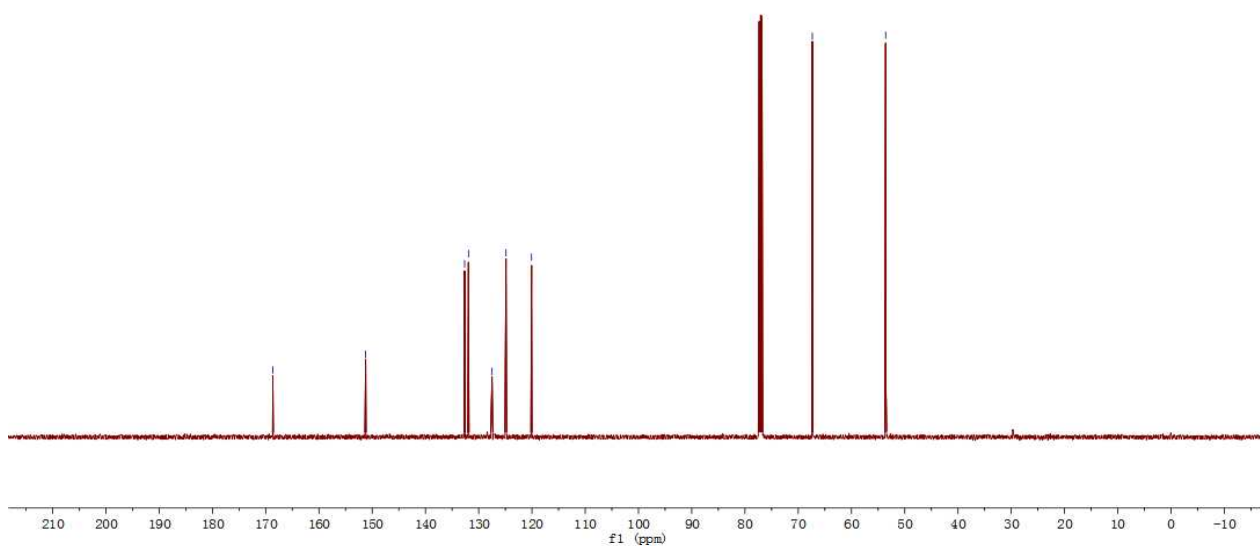

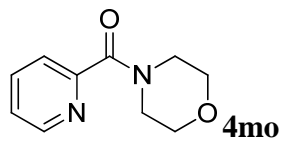

**<sup>1</sup>H NMR**

8.574  
8.571  
8.571  
8.566  
8.565  
8.565  
7.814  
7.802  
7.799  
7.787  
7.782  
7.672  
7.656  
7.356  
7.354  
7.347  
7.344  
7.341  
7.339  
7.331  
7.324

3.801  
3.686  
3.679  
3.679  
3.646  
3.637  
3.629

1.864  
1.864

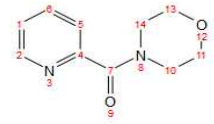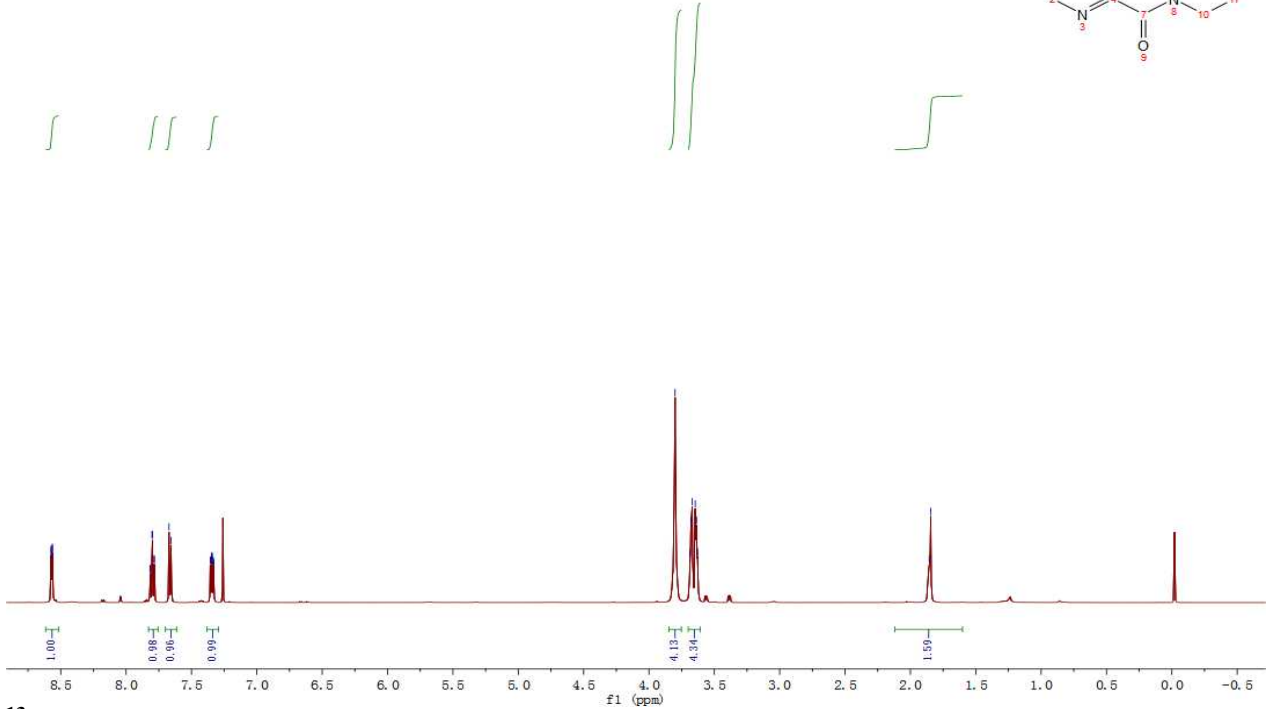

**<sup>13</sup>C NMR**

167.406  
153.627  
148.265  
137.206

124.091  
124.174

67.037  
66.922

47.750  
42.798

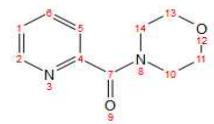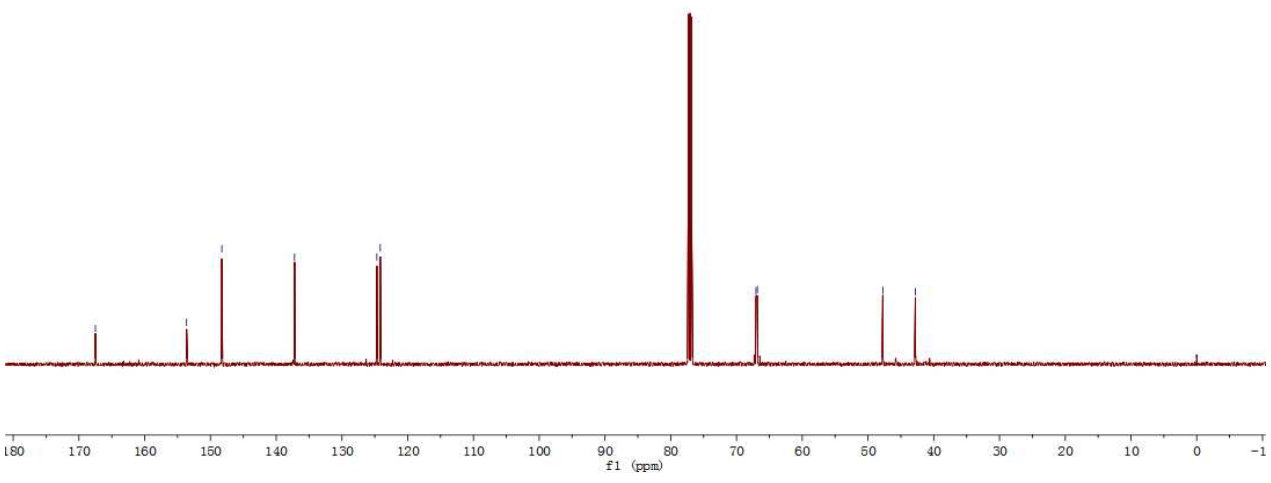

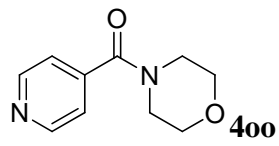

**<sup>1</sup>H NMR**

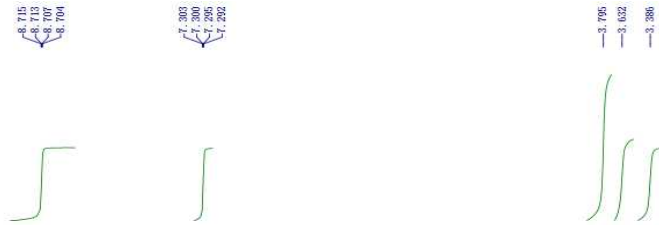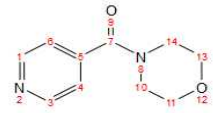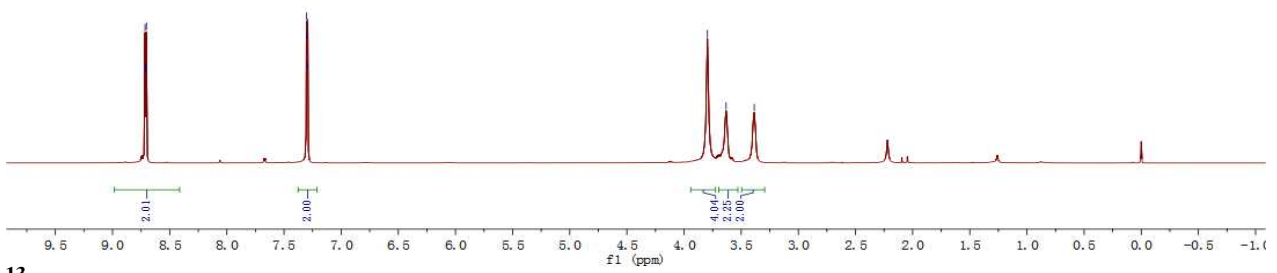

**<sup>13</sup>C NMR**

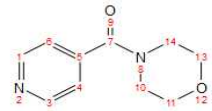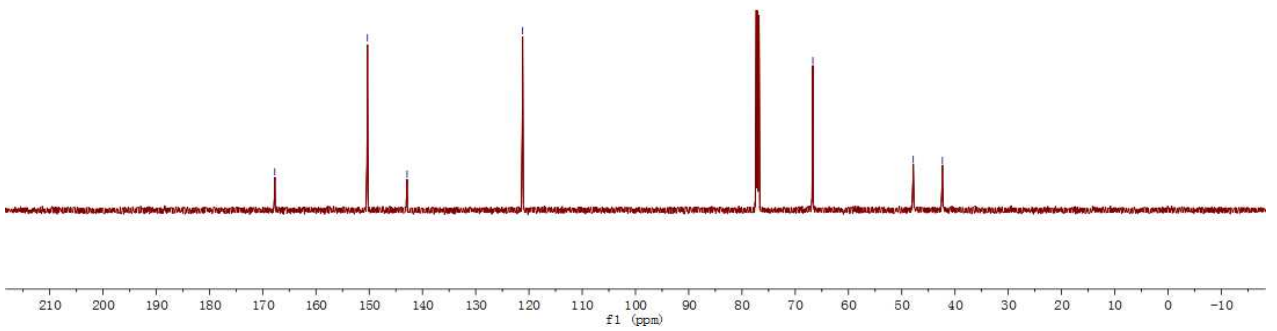

# <sup>1</sup>H NMR

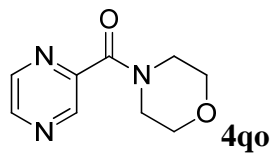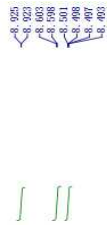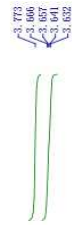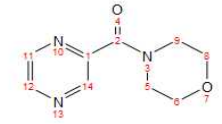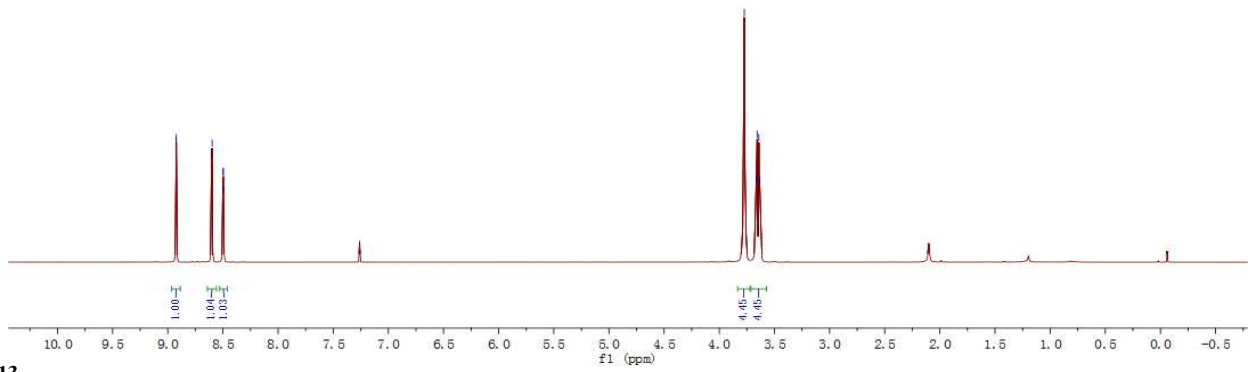

# <sup>13</sup>C NMR

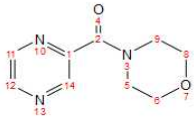

165.028

148.841  
145.851  
145.849  
142.499

66.882  
66.711

47.638  
43.824

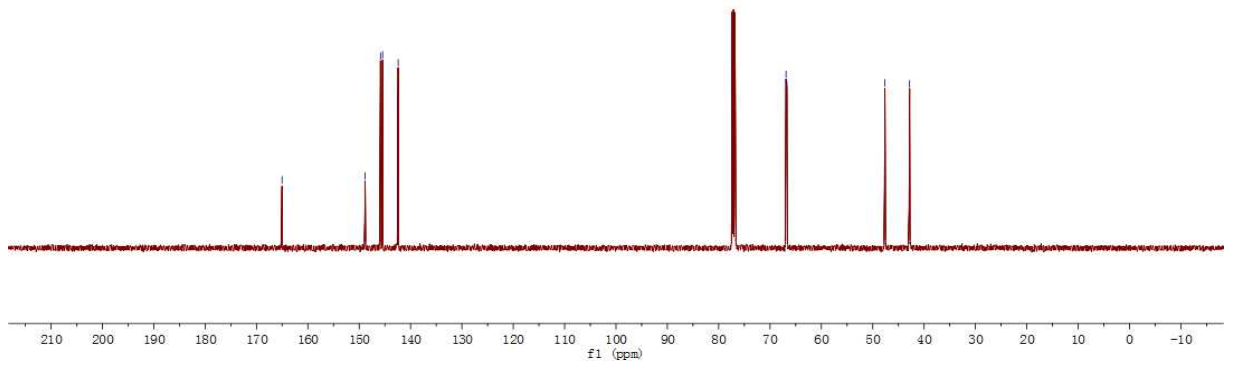

Supplement: c6gc01565d1.pdf [file c6gc01565d1.pdf]
